# Supplementary material for: Amplification of Enantiomeric Excess without Any Chiral Source in Prebiotic Case
Source: Preprints.org preprint supplement (doi:10.20944/preprints202307.0287.v1), 2023-07-05
Supplement: Supplementary file 1 [file supplementary]

Supplementary Materials (SM) for

## **Amplification of Enantiomeric Excess without Any Chiral Source in Prebiotic Case**

Huajie Zhu, <sup>a,b\*</sup> Yunjing Jia, <sup>a,b</sup> Fei Cao, <sup>b</sup> Yujun Zhu, <sup>d</sup> Charles U. Pittman, Jr. <sup>c\*</sup>

<sup>a</sup>School of Chemical and Pharmaceutical Engineering, Hebei University of Science and Technology, 050018, Shijiazhuang, P. R. China.

<sup>b</sup>Institute of Life Science and Green Development, College of Pharmacy, Hebei University, 071002, Baoding, P. R. China.

<sup>c</sup>Department of Chemistry, Mississippi State University, Starkville, 39762, MS, US.

<sup>d</sup>Clinic Medical School of Medicine, Anhui Medical University, 230012, P. R. China.

### List of the SM

| Item | Descriptions                                                                                                                                                                             | Page |
|------|------------------------------------------------------------------------------------------------------------------------------------------------------------------------------------------|------|
| 1    | Reactions of tryptophan esters with biacetyl and computational methods                                                                                                                   | 2    |
| 2    | <sup>1</sup> H, <sup>13</sup> C NMR, HMBC spectra for the two major products (Figures S1-S6, Tables S1-2)                                                                                | 3    |
| 3    | Experimental OR values and ECD experimental spectra for <b>3</b> and <b>4</b> (Figures S7, Table S3)                                                                                     | 11   |
| 4    | Energy computations for 32 enantiomers of <b>3</b> and <b>4</b> at the B3LYP/6-31G(d) level (Table S4)                                                                                   | 32   |
| 5    | Computations of five enantiomers of <b>3</b> and <b>4</b> : Energies, coordinates at three different quantum levels (Tables S5-S6)                                                       | 35   |
| 6    | Coordinates for the four low energy compounds at the B3LYP/6-311++G(2d,p) level in CH <sub>2</sub> Cl <sub>2</sub> using PCM (Tables S7-S10).                                            | 36   |
| 7    | Computations of both the OR and ECD spectra for four enantiomers at the B3LYP/6-311++G(2d,p) level in the gas phase and their comparison with experimental results (Tables S11, Fig. S8) | 43   |
| 8    | Analysis of %ee values and yields of the recovered L-TME via HPLC (Tables S12-S15)                                                                                                       | 45   |
| 9    | Analysis of %ee values of ( <i>S</i> )-benzamide via HPLC (Figs. S9-S10, Table S16)                                                                                                      | 59   |
| 10   | The specific optical rotations for different L-TME samples                                                                                                                               | 63   |
| 11   | The energy for the compounds <b>5</b> and <b>6</b> at the B3LYP/6-31G(d) level (Tables S17)                                                                                              | 64   |
| 12   | Computations of six isomers of <b>5</b> and <b>6</b> : Energy, coordinates at three different quantum levels (Tables S18-S21)                                                            | 67   |
| 13   | Analysis of %ee values of TME via HPLC (Tables S22)                                                                                                                                      | 74   |
| 14   | The %ee <sub>2</sub> values of TME via HPLC (Table S23)                                                                                                                                  | 84   |
| 15   | HPLC analysis of %ee values of recovered L-phenylalanine (Tables S24-S25)                                                                                                                | 85   |
| 16   | The computed relative energies for the cyclodimers of six selected amino acids (Tables S26)                                                                                              | 89   |

## Item 1. Reactions of tryptophan esters with biacetyl and computational methods

### 1. General synthetic procedure:

A/. Synthesis of tryptophan methyl ester. To methanol (100 mL) was added SOCl<sub>2</sub> (3.0 equiv. of L-tryptophan) at -10 °C. After 10 min, L-tryptophan (1.0 g) powder was added into the solution quickly. The powder quickly dissolved in methanol. After reacting over night at room temperature, the solution was heated to reflux for 2 h. Methanol was then removed under the reduced pressure. The residue was then dissolved in ethyl acetate/water (3/1) solution, the aqueous NaOH solution was added to adjust the pH to near 10. After the organic layer was separated from the water phase, the aqueous phase was extracted with ethyl acetate three times. The combined organic layer was then dried over Na<sub>2</sub>SO<sub>4</sub>. TLC analysis exhibited that only one major compound found. The organic layer was filtered and ethyl acetate was removed under the reduced pressure. The residue was L-tryptophan methyl ester (L-TME).

B/. Typical condensation reaction. To a solution of L-tryptophan methyl ester (for example, 0.55 mmol of **1** and 0.45 mmole of **2**) in CH<sub>2</sub>Cl<sub>2</sub> (50 mL), biacetyl (0.405 mmol) was added at 0 °C. It was stirred for several hours (2 to 36 h) to reach equilibrium before molecular sieves (MS) and TFA were added. Then MS and TFA were added and stirring was continued for over 10 h. Na<sub>2</sub>CO<sub>3</sub> powder was then added to neutralize the TFA. Two major products **3** and **4** were obtained by using column chromatography over silica gel using the mixture of CH<sub>2</sub>Cl<sub>2</sub> and methanol. Their NMR spectra are listed in the next part. The enantiomers of **3** and **4** were separated by HPLC using chiral chromatography as mentioned below.

C/. Preparation of different %ee L-TME sample. The commercially available mixture of L-tryptophan and D-tryptophan has about 10%ee. Thus, adding different quantities of optical pure L-TME (99%ee) can afford various concentrations of L-TME (different %ee) for the reactions. These samples with different L-TME %ee were then used for enrichment reactions.

The measurement of NMR was performed under the Bruker AVANCE III

### General computational methods

All possible conformations were searched by using MMFF94S force field for all compounds involved in this study. All of these conformations were then optimized at the B3LYP/6-31G(d) level in the gas phase first. Then, the lower energy conformers with relative energy of 0-6 kcal/mol were further optimized at the B3LYP/6-311+G(d) level in the gas phase and in solution using PCM model, respectively. These B3LYP/6-311+G(d)-optimized conformers may be re-optimized at the B3LYP/6-311++G(2d,p) level in the gas phase or in solution using PCM model if necessary. Optical rotation (OR) and electronic circular dichroism (ECD) or <sup>13</sup>C NMR were computed at the corresponding levels as marked in each notice for the corresponding compounds. For more details, please see the following examples.

## Item 2. $^1\text{H}$ , $^{13}\text{C}$ NMR, HMBC spectra for the two major products.

Compound named in the text: (*R,S*)-3(2)

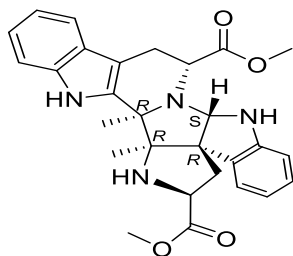

(*R,S*)-3(2)  $^1\text{H}$ -NMR

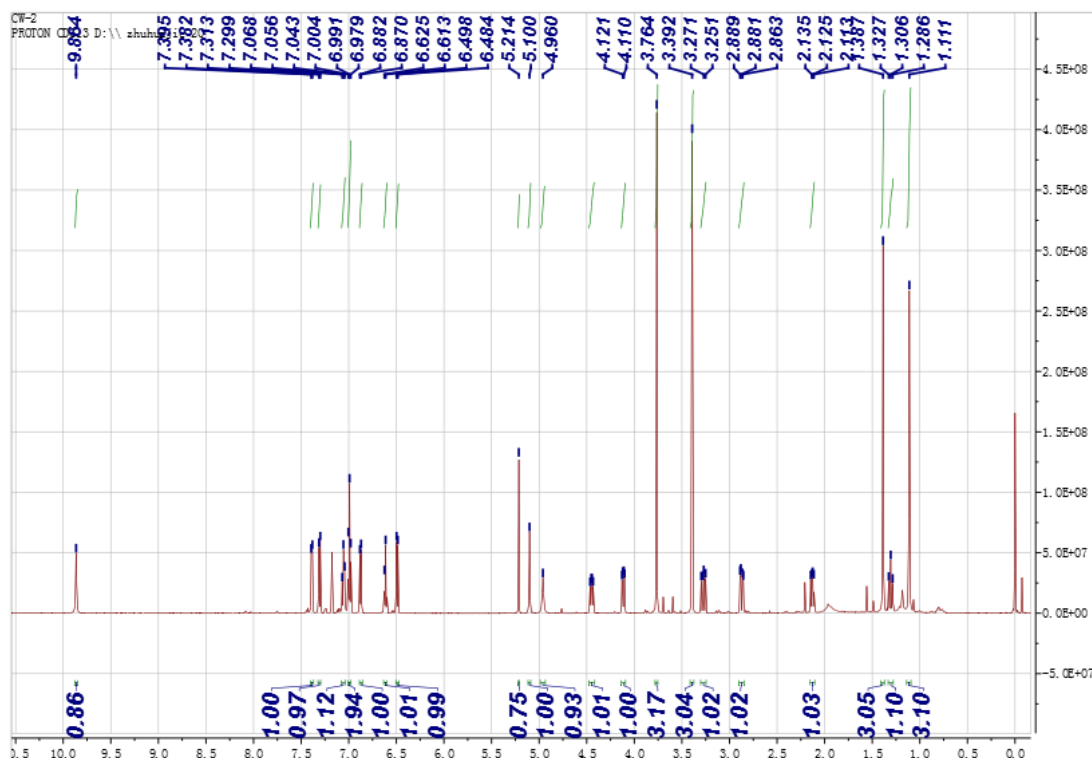

Fig. S1  $^1\text{H}$  NMR spectra for (*R,S*)-3(2)

$^1\text{H}$  NMR (600 MHz, CDCl<sub>3</sub>)  $\delta$  7.39 (1 H, d,  $J=7.8\text{Hz}$ , H-5), 7.31 (1 H, d,  $J=7.86\text{ Hz}$ , H-1), 7.05 (1 H, t,  $J=7.2\text{ Hz}$ , H-6), 6.99 (1 H, H-4), 6.99 (1 H, H-25), 6.88 (1 H, d,  $J=7.2\text{ Hz}$ , H-27), 6.63 (1 H, t,  $J=7.2\text{ Hz}$ , H-26), 6.49 (1 H, d,  $J=8.4\text{ Hz}$ , H-28), 5.10 (1 H, s, H-18), 4.45 (1 H, dd,  $J=12, 7.2\text{ Hz}$ , H-20), 4.12 (1 H, dd,  $J=12.0, 5.1\text{ Hz}$ , H-10), 3.76 (3 H, s, H-12), 3.39 (3 H, s, H-22), 3.27 (1 H, dd,  $J=15.6, 12\text{ Hz}$ , H-19a), 2.88 (1 H, dd,  $J=15.6, 4.8\text{ Hz}$ , H-19b), 2.15 (1 H, dd,  $J=13.2, 7.2\text{ Hz}$ , H-19a), 1.38 (3 H, s, H-14), 1.30 (1 H, t, H-19b), 1.11 (3 H, s, H-16)

(*R,S*)-3(2)  $^{13}\text{C}$ -NMR

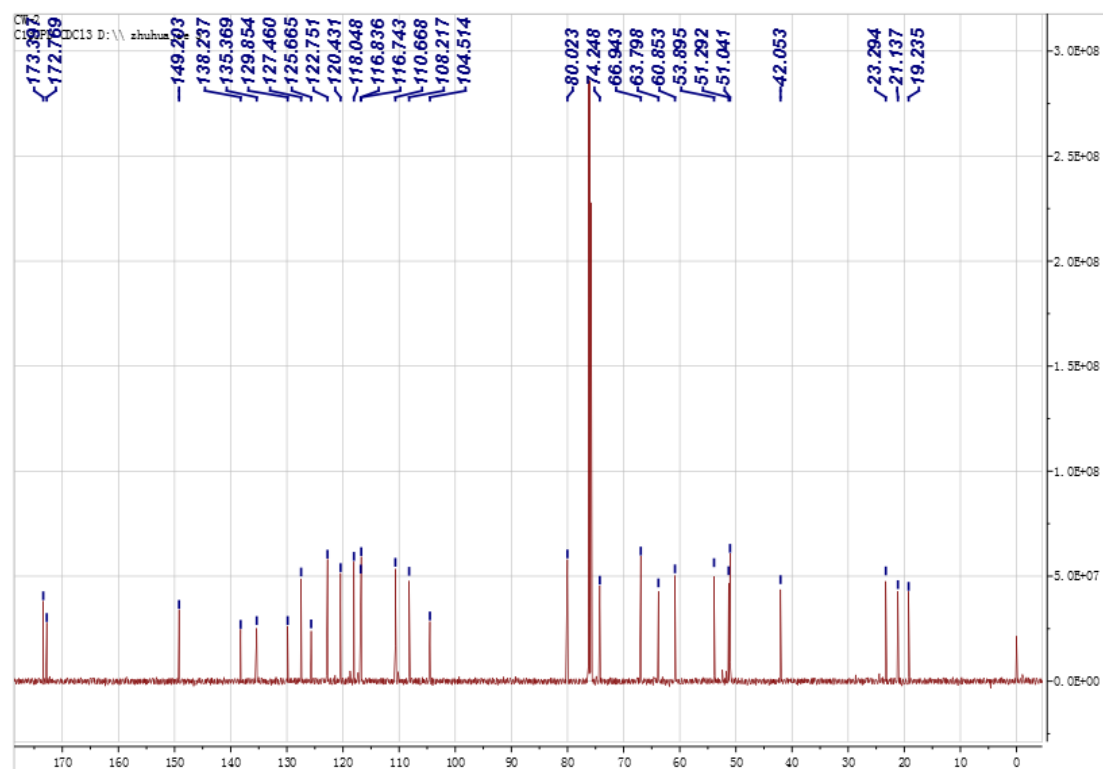

Fig. S2  $^{13}\text{C}$  NMR spectra for (*R,S*)-3(2)

$^{13}\text{C}$  NMR:

(150MHz,  $\text{CDCl}_3$ )  $\delta$  173.4 (C, C-11), 172.8 (C, C-21), 149.2 (C, C-23), 138.2 (C, C-8), 135.4 (C, C-2), 129.9 (C, C-24), 127.5 (CH, C-25), 125.7 (C, C-3), 122.8 (CH, C-27), 120.4 (CH, C-6), 118.0 (C, C-4), 116.8 (CH, C-26), 116.6 (CH, C-5), 110.7 (CH, C-1), 108.2 (CH, C-28), 104.5 (C, C-7), 80.0 (CH, C-18), 74.2 (C, C-15), 66.9 (C, C-13), 63.7 (C, C-17), 60.8 (CH, C-20), 53.9 (CH, C-10), 51.3 ( $\text{CH}_3$ , C-12), 51.0 ( $\text{CH}_3$ , C-22), 42.0 ( $\text{CH}_2$ , C-19), 23.3 ( $\text{CH}_3$ , C-14), 21.1 ( $\text{CH}_3$ , C-16), 19.2 ( $\text{CH}_2$ , C-9).

(*R,S*)-**3**(2) HMBC spectrum

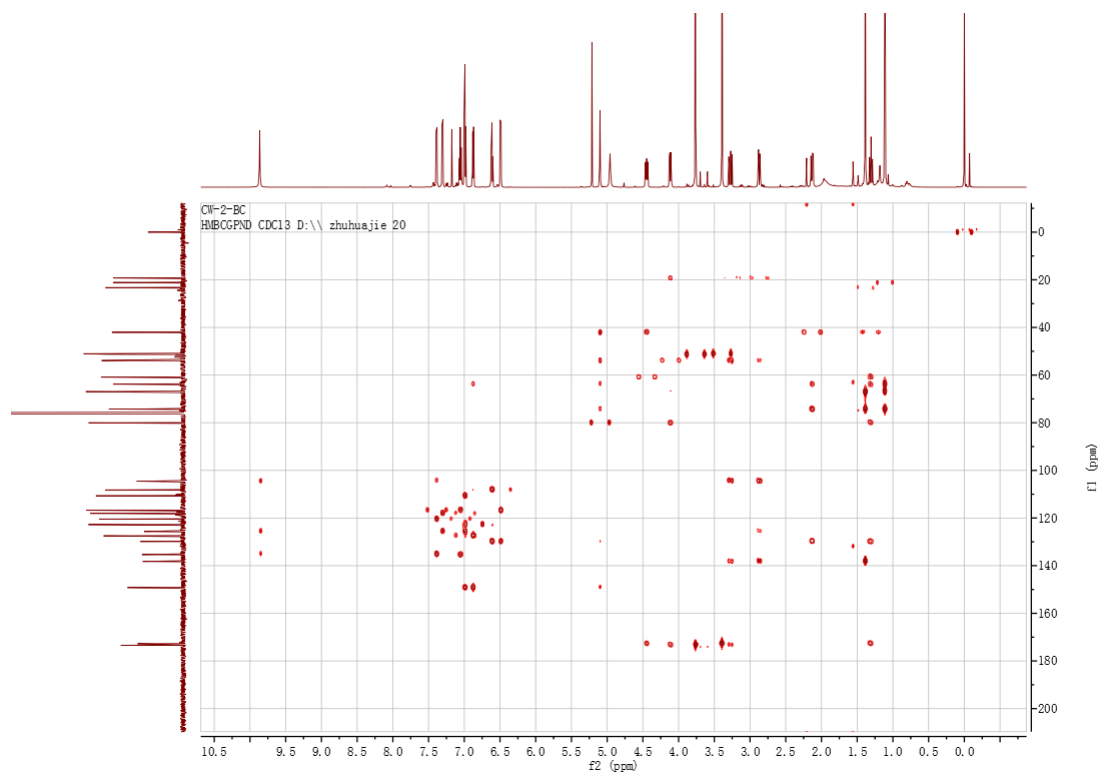

Fig. S3 The HMBC spectrum for (*R,S*)-**3**(2)

The relationship of <sup>1</sup>H and <sup>13</sup>C in the HMBC is summarized in Table S1 too.

Compound named in the text: (*S,S*)-4(*I*)

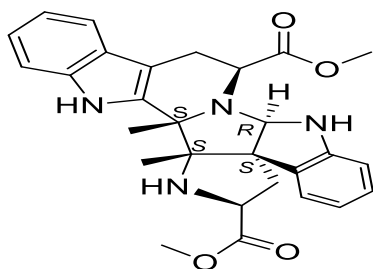

(*S,S*)-4(*I*) <sup>1</sup>H-NMR

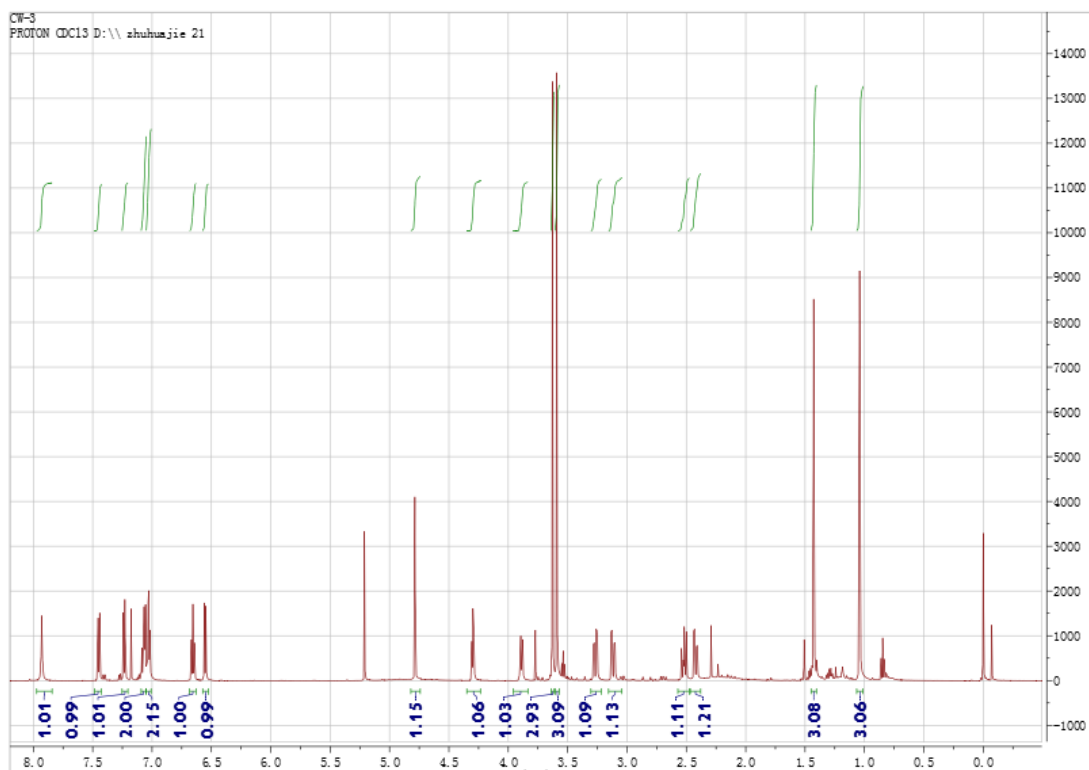

Fig. S4 The <sup>1</sup>H NMR for (*S,S*)-4(*I*) compound in CDCl<sub>3</sub>.

<sup>1</sup>H NMR:

<sup>1</sup>H NMR (600 MHz, CDCl<sub>3</sub>)  $\delta$  7.44 (1 H, d,  $J=7.8$  Hz, H-26), 7.24 (1 H, d,  $J=7.8$  Hz, H-1), 7.07 (1 H, H-6), 7.05 (1 H, H-27), 7.02 (1 H, H-4), 7.02 (1 H, H-25), 6.65 (1 H, t,  $J=7.2$  Hz, H-5), 6.54 (1 H, d,  $J=7.8$  Hz, H-28), 4.78 (1 H, s, H-18), 4.29 (1 H, t,  $J=5.4$  Hz, H-10), 3.89 (1 H, dd,  $J=10.2, 4.8$  Hz, H-20), 3.62 (3 H, s, H-22), 3.58 (3 H, s, H-12), 3.27 (1 H, dd,  $J=15, 6.0$  Hz, H-9a), 3.12 (1 H, dd,  $J=15, 5.4$  Hz, H-9b), 2.51 (1 H, dd, H-19a), 2.41 (1 H, dd,  $J=14.4, 4.8$  Hz, H-19b), 1.43 (3 H, H-16), 1.04 (3 H, s, H-14)

(*S,S*)-4(*I*) <sup>13</sup>C-NMR

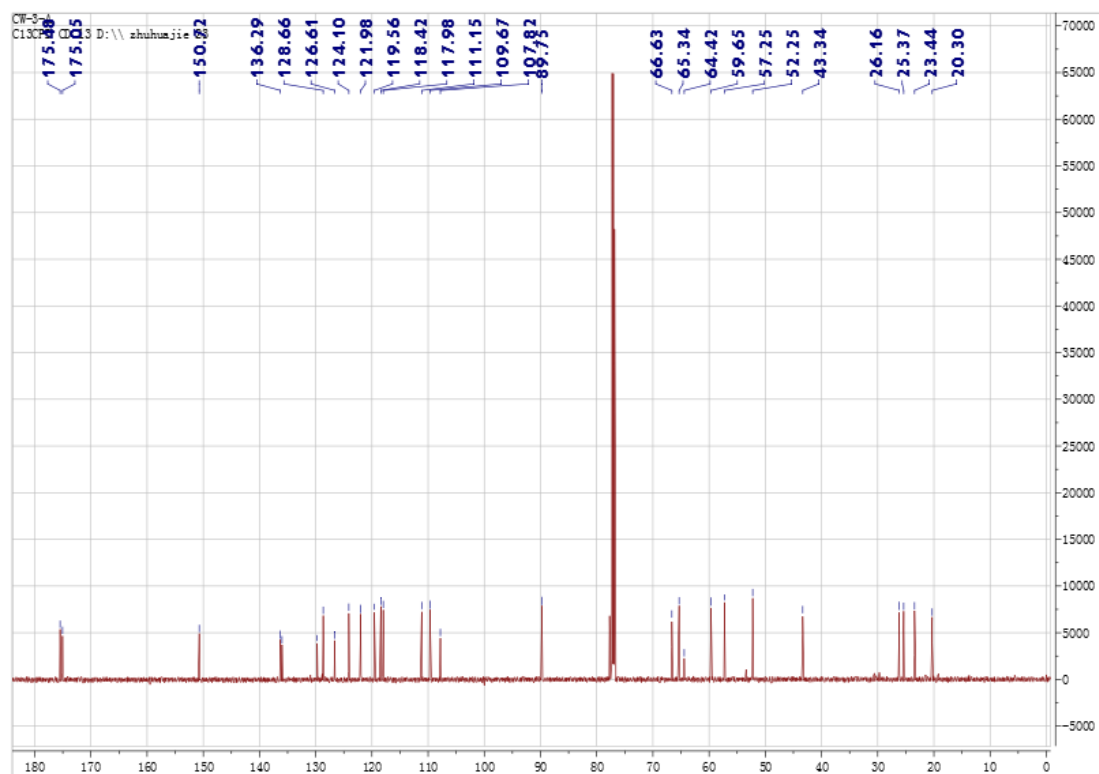

Fig. S5 The <sup>13</sup>C-NMR for (*S,S*)-4(*I*) compound in CDCl<sub>3</sub>.

<sup>13</sup>C NMR (150 MHz, CDCl<sub>3</sub>)  $\delta$  175.5 (C, C-11), 175.0 (C, C-21), 150.7 (C, C-23), 136.3 (C, C-2), 136.0 (C, C-8), 129.7 (C, C-24), 128.7 (CH, C-25), 126.6 (C, C-3), 124.1 (CH, C-27), 122.0 (CH, C-6), 119.6 (CH, C-4), 118.4 (CH, C-26), 118.0 (CH, C-5), 111.2 (CH, C-1), 109.7 (CH, C-28), 107.8 (C, C-7), 89.7 (CH, C-18), 77.7 (C, C-15), 66.6 (C, C-13), 65.3 (C, C-17), 59.6 (CH, C-10), 57.3 (CH, C-20), 52.3 (CH<sub>3</sub>, C-12), 52.2 (CH<sub>3</sub>, C-22), 43.3 (CH<sub>2</sub>, C-19), 26.2 (CH<sub>3</sub>, C-14), 26.2 (CH<sub>3</sub>, C-16) 23.4 (CH<sub>2</sub>, C-9)

(*S,S*)-4(*I*) HMBC spectrum

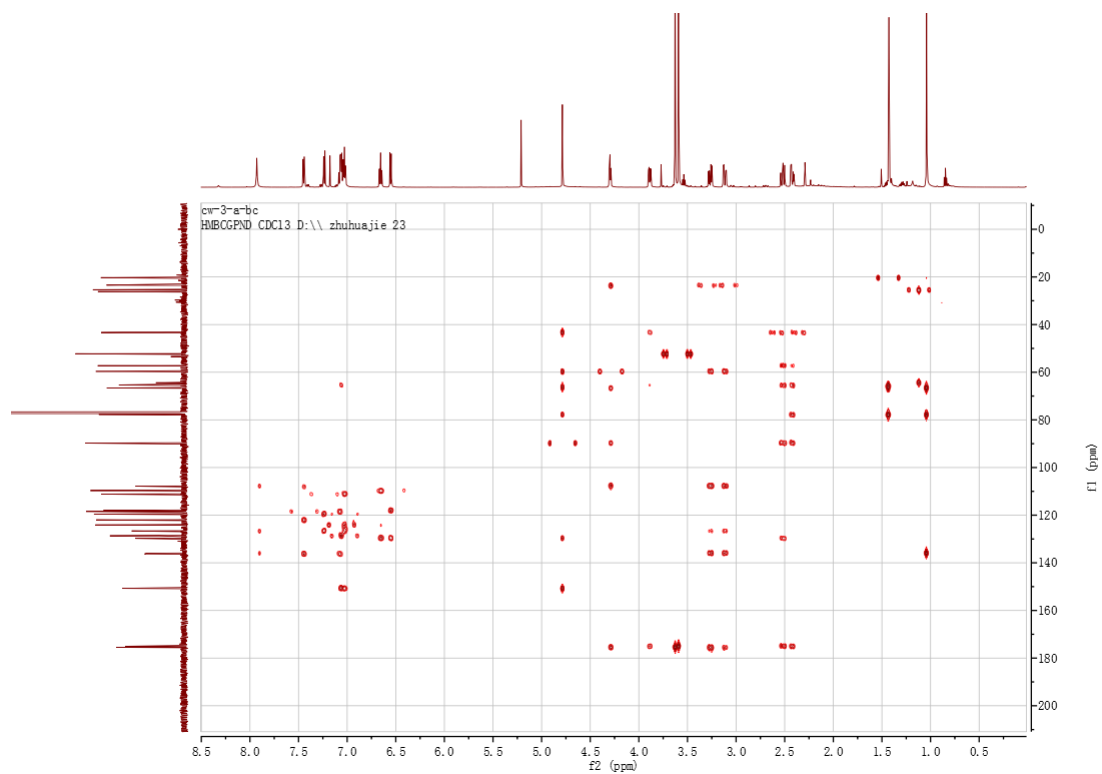

Fig. S6. The HMBC spectrum for (*S,S*)-4(*I*). The relationship of H and C in the HMBC is summarized below (also see the specific data in Table S2)

Table S1. Relationship of C and H in HMBC spectra for (*R,S*)-**3**(2)

| No. | $\delta_C$ | Type            | $\delta_H$ ( <i>J</i> in Hz)                                                          | HMBC                |
|-----|------------|-----------------|---------------------------------------------------------------------------------------|---------------------|
| 1   | 110.7      | CH              | 7.31 (d, <i>J</i> =7.86)                                                              | H-4                 |
| 2   | 120.4      | CH              | 7.05 (t, <i>J</i> =7.2)                                                               | H-4,H-3             |
| 3   | 116.6      | CH              | 7.39 (d, <i>J</i> =7.8)                                                               | H-2                 |
| 4   | 118.0      | CH              | 6.99 (s)                                                                              | H-1                 |
| 4a  | 125.7      | C               |                                                                                       | H-1,H-4,H-2,H-5     |
| 4b  | 104.5      | C               |                                                                                       | H-3,H-5             |
| 5   | 19.2       | CH <sub>2</sub> | 3.27 (dd, <i>J</i> =12, <i>J</i> =15.6) ,<br>2.88 (dd, <i>J</i> =4.8, <i>J</i> =15.6) | H-6                 |
| 6   | 53.9       | CH              | 4.12 (dd, <i>J</i> = 5.1, <i>J</i> =12)                                               | H-5                 |
| 7   |            | N               |                                                                                       |                     |
| 7a  | 80.0       | CH              | 5.10 (s)                                                                              | H-6                 |
| 8   |            | NH              | 4.96                                                                                  |                     |
| 8a  | 149.2      | C               |                                                                                       | H-12,H-10           |
| 9   | 108.2      | CH              | 6.49 (d, <i>J</i> = 8.4)                                                              | H-11,H-10           |
| 10  | 127.5      | CH              | 6.99                                                                                  | H-12                |
| 11  | 116.8      | CH              | 6.63 (t, <i>J</i> =7.2)                                                               | H-12,H-9            |
| 12  | 122.8      | CH              | 6.88 (d, <i>J</i> = 7.2)                                                              | H-10                |
| 12a | 129.9      | C               |                                                                                       | H-13,H-9,H-11       |
| 12b | 63.7       | C               |                                                                                       | H-21, H-13          |
| 13  | 42.0       | CH <sub>2</sub> | 2.15 (dd, <i>J</i> = 7.2, <i>J</i> =13.2)                                             | H-7a, H-14          |
| 14  | 60.8       | CH              | 4.45 (dd, <i>J</i> = 7.2, <i>J</i> =12)                                               | H-13                |
| 15  |            | NH              | 5.21(s)                                                                               |                     |
| 15a | 74.2       | C               |                                                                                       | H-22,H-21,H-7a,H-13 |
| 15b | 66.9       | C               |                                                                                       | H-22,H-21           |
| 15c | 138.2      | C               |                                                                                       | H-5,H-22            |
| 16  |            | NH              | 9.86 (s)                                                                              |                     |
| 16a | 135.4      | C               |                                                                                       | H-3,H-2             |
| 17  | 173.4      |                 |                                                                                       | H-5,H-6,H-18        |
| 18  | 51.3       | CH <sub>3</sub> | 3.76 (s)                                                                              |                     |
| 19  | 172.8      |                 |                                                                                       | H-13,H-14,H-20      |
| 20  | 51.0       | CH <sub>3</sub> | 3.39 (s)                                                                              |                     |
| 21  | 21.1       | CH <sub>3</sub> | 1.11 (s)                                                                              | H-22                |
| 22  | 23.3       | CH <sub>3</sub> | 1.38 (s)                                                                              | H-21,H-13           |

The key correlations of H-6 with C-7a, H13, H21 with C-12b, H7a with C-13, H7a, H13 with C-15a clearly exhibited the key ring structures as illustrated below. The ROSEY of H-6 and H-21 and H7a exhibited that the protons on the corresponding C located at the same side.

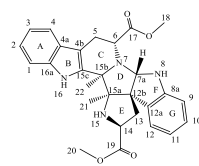(*R,S*)-**3**(2) (Its enantiomer is (*S,R*)-**3**(2))

Table S2 Relationship of C and H in HMBC spectra ((*S,S*)-4(*I*) in DMSO-*d*<sub>6</sub>)

| No.     | $\delta$ C (ppm) | Type            | $\delta$ H (ppm, <i>J</i> in Hz)                                                      | HMBC            |
|---------|------------------|-----------------|---------------------------------------------------------------------------------------|-----------------|
| 1       | 111.2            | CH              | 7.24 (d, <i>J</i> =7.8)                                                               | H4, H2          |
| 2       | 122.0            | CH              | 7.07                                                                                  | H4,H3           |
| 3       | 118.0            | CH              | 6.65 (t, <i>J</i> =7.2)                                                               | H4a,H4,H2       |
| 4       | 119.6            | CH              | 7.02                                                                                  | H3,H2           |
| 4a      | 126.6            | C               |                                                                                       | H4,H2,H5        |
| 4b      | 107.8            | C               |                                                                                       | H5,H6           |
| 5       | 23.4             | CH <sub>2</sub> | 3.12 (dd, <i>J</i> =5.4, <i>J</i> =15) , 3.27 (dd, <i>J</i> = 6, <i>J</i> =15)        | H5,H6           |
| 6       | 59.6             | CH              | 4.29 (t, <i>J</i> =5.4)                                                               | H5,H7a          |
| 7       |                  | N               |                                                                                       |                 |
| 7a      | 89.7             | CH              | 4.78 (s)                                                                              | H6,H15a,H13,H8a |
| 8       |                  | NH              |                                                                                       |                 |
| 8a      | 150.7            | C               |                                                                                       | H7a,H12,H10     |
| 9       | 109.7            | CH              | 6.54 (d, <i>J</i> = 7.8)                                                              | H10             |
| 10      | 124.1            | CH              | 7.05                                                                                  | H12,H11         |
| 11      | 118.4            | CH              | 7.44 (d, <i>J</i> =7.8)                                                               | H12,H10         |
| 12      | 128.7            | CH              | 7.02                                                                                  | H11,H10         |
| 12a     | 129.7            | C               |                                                                                       | H7a,H9          |
| 12b     | 65.3             | C               |                                                                                       | H7a,H13         |
| 13      | 43.3             | CH <sub>2</sub> | 2.41 (dd, <i>J</i> = 4.8, <i>J</i> =14.4) , 2.51 (dd, <i>J</i> =10.2, <i>J</i> =14.4) | H14             |
| 14      | 57.3             | CH              | 3.89 (dd, <i>J</i> = 4.8, <i>J</i> =10.2)                                             | H13             |
| 15      |                  | NH              | 5.21                                                                                  |                 |
| 15, 15a | 77.7             | C               |                                                                                       | H22,H7a         |
| 15b     | 66.6             | C               |                                                                                       | H6,H22,H7a      |
| 15c     | 136.0            | C               |                                                                                       | H5,H22          |
| 16      |                  | NH              | 9.86(s)                                                                               |                 |
| 16a     | 136.3            | C               |                                                                                       | H2              |
| 17      | 175.5            | O               |                                                                                       |                 |
| 18      | 52.3             | CH <sub>3</sub> | 3.58 (s)                                                                              |                 |
| 19      | 175.0            |                 |                                                                                       | H13,H14         |
| 20      | 52.2             | CH <sub>3</sub> | 3.62 (s)                                                                              | H13,H14         |
| 21      | 26.2             | CH <sub>3</sub> | 1.43 (s)                                                                              | H17             |
| 22      | 26.2             | CH <sub>3</sub> | 1.04 (s)                                                                              | H17             |

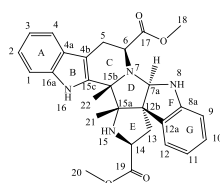**(*S,S*)-4(*I*)**

### Item 3. Experimental OR values and ECD experimental spectra for 3 and 4

#### 3.1 Experimental OR values

(1) The isolated **3** and **4** gave two HPLC signals upon separation using a Chiralcel-IA stationary phase using 1% ee of the starting material L-tryptophan methyl ester. The mixture of petroleum ether and isopropanol (80:20) were used in the HPLC separation of enantiomer **3**. The mixtures of petroleum ether and isopropanol (v/v: 85:15) were used for **4** isolation. The HPLC plots for the two compounds are illustrated below:

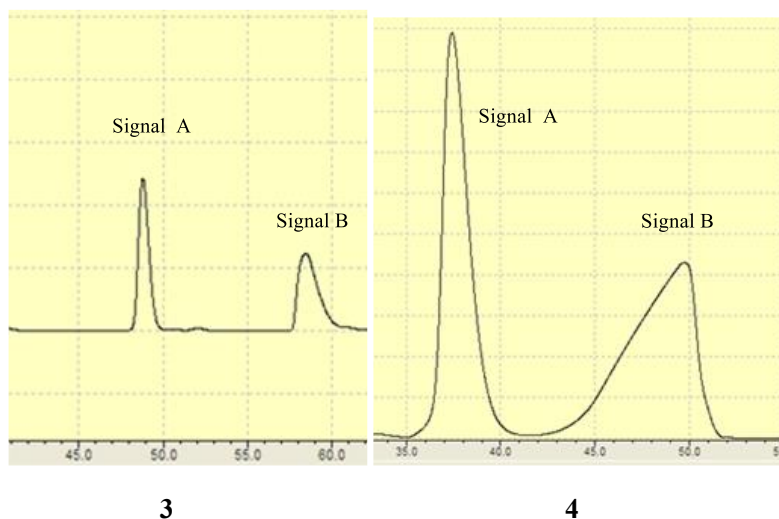

Fig. S7 The HPLC plots for major products **3** and **4** using Chiralcel-IA. The specific optical rotations are +32.0 for signal A (named as **3SA**) and almost -32.0 for signal B (**3SB**). The specific optical rotation values are +104.0 for signal A (**4SA**) and -104.0 for signal B (**4SB**). The solvent is chloroform.

**Table S3** Experimental ECD spectra for (+)-**3SA** and (-)-**4SB**

| Wavelength (nm) | ECD for (+)- <b>3SA</b> | ECD for (-)- <b>4SB</b> |
|-----------------|-------------------------|-------------------------|
| 190             | 1.78976                 | -0.0760804              |
| 190.25          | 2.42079                 | 0.737725                |
| 190.5           | 2.97889                 | 1.44478                 |
| 190.75          | 3.54152                 | 2.14615                 |
| 191             | 4.06652                 | 2.77566                 |
| 191.25          | 4.56689                 | 3.33791                 |
| 191.5           | 4.99908                 | 3.78333                 |
| 191.75          | 5.33063                 | 4.06254                 |
| 192             | 5.50605                 | 4.1175                  |
| 192.25          | 5.48897                 | 3.92019                 |
| 192.5           | 5.26765                 | 3.48237                 |
| 192.75          | 4.86275                 | 2.86395                 |
| 193             | 4.31677                 | 2.16448                 |
| 193.25          | 3.68669                 | 1.50073                 |
| 193.5           | 3.02997                 | 0.983113                |

|        |          |          |
|--------|----------|----------|
| 193.75 | 2.3997   | 0.694884 |
| 194    | 1.84649  | 0.675148 |
| 194.25 | 1.40733  | 0.931213 |
| 194.5  | 1.1157   | 1.43163  |
| 194.75 | 0.995483 | 2.111    |
| 195    | 1.04361  | 2.88567  |
| 195.25 | 1.22198  | 3.66842  |
| 195.5  | 1.48435  | 4.37016  |
| 195.75 | 1.77645  | 4.92417  |
| 196    | 2.04577  | 5.31293  |
| 196.25 | 2.27063  | 5.54702  |
| 196.5  | 2.46751  | 5.65955  |
| 196.75 | 2.65777  | 5.69595  |
| 197    | 2.85378  | 5.69536  |
| 197.25 | 3.06462  | 5.64952  |
| 197.5  | 3.27694  | 5.53082  |
| 197.75 | 3.44749  | 5.31222  |
| 198    | 3.54053  | 4.97346  |
| 198.25 | 3.55744  | 4.51369  |
| 198.5  | 3.51588  | 3.98117  |
| 198.75 | 3.45409  | 3.45484  |
| 199    | 3.44899  | 3.00376  |
| 199.25 | 3.57998  | 2.68718  |
| 199.5  | 3.8802   | 2.53896  |
| 199.75 | 4.35389  | 2.55536  |
| 200    | 4.97556  | 2.70023  |
| 200.25 | 5.65925  | 2.93655  |
| 200.5  | 6.2905   | 3.21809  |
| 200.75 | 6.77545  | 3.49837  |
| 201    | 7.04268  | 3.74022  |
| 201.25 | 7.05161  | 3.91716  |
| 201.5  | 6.82828  | 4.00672  |
| 201.75 | 6.43901  | 4.00298  |
| 202    | 5.97017  | 3.92732  |
| 202.25 | 5.50821  | 3.80917  |
| 202.5  | 5.12161  | 3.67955  |
| 202.75 | 4.83412  | 3.56991  |
| 203    | 4.64148  | 3.50585  |
| 203.25 | 4.50646  | 3.48767  |
| 203.5  | 4.38523  | 3.51202  |
| 203.75 | 4.2511   | 3.5784   |
| 204    | 4.10068  | 3.67547  |
| 204.25 | 3.93764  | 3.78378  |

|        |         |         |
|--------|---------|---------|
| 204.5  | 3.78272 | 3.88889 |
| 204.75 | 3.65505 | 3.96453 |
| 205    | 3.54891 | 3.97177 |
| 205.25 | 3.44389 | 3.89209 |
| 205.5  | 3.33396 | 3.72568 |
| 205.75 | 3.21918 | 3.48201 |
| 206    | 3.10956 | 3.20538 |
| 206.25 | 3.03453 | 2.9654  |
| 206.5  | 3.02885 | 2.82387 |
| 206.75 | 3.10277 | 2.81698 |
| 207    | 3.24152 | 2.96506 |
| 207.25 | 3.41007 | 3.2355  |
| 207.5  | 3.56984 | 3.5677  |
| 207.75 | 3.68836 | 3.88624 |
| 208    | 3.7477  | 4.14755 |
| 208.25 | 3.75251 | 4.33128 |
| 208.5  | 3.72471 | 4.46136 |
| 208.75 | 3.6664  | 4.57495 |
| 209    | 3.55914 | 4.72182 |
| 209.25 | 3.37788 | 4.91043 |
| 209.5  | 3.09982 | 5.11282 |
| 209.75 | 2.7114  | 5.27313 |
| 210    | 2.24265 | 5.33043 |
| 210.25 | 1.76458 | 5.23183 |
| 210.5  | 1.36536 | 4.97476 |
| 210.75 | 1.11151 | 4.61131 |
| 211    | 1.03469 | 4.23634 |
| 211.25 | 1.12518 | 3.96436 |
| 211.5  | 1.31896 | 3.89334 |
| 211.75 | 1.52738 | 4.07181 |
| 212    | 1.6851  | 4.48303 |
| 212.25 | 1.76718 | 5.03602 |
| 212.5  | 1.76318 | 5.60135 |
| 212.75 | 1.71347 | 6.05688 |
| 213    | 1.67226 | 6.3163  |
| 213.25 | 1.67378 | 6.34474 |
| 213.5  | 1.72169 | 6.18044 |
| 213.75 | 1.8219  | 5.90104 |
| 214    | 1.93967 | 5.58807 |
| 214.25 | 2.03495 | 5.30221 |
| 214.5  | 2.07697 | 5.07842 |
| 214.75 | 2.04357 | 4.91249 |
| 215    | 1.91161 | 4.76825 |

|        |          |         |
|--------|----------|---------|
| 215.25 | 1.69619  | 4.59923 |
| 215.5  | 1.42979  | 4.36413 |
| 215.75 | 1.16322  | 4.03799 |
| 216    | 0.965299 | 3.61755 |
| 216.25 | 0.909212 | 3.13853 |
| 216.5  | 1.02727  | 2.65987 |
| 216.75 | 1.32025  | 2.26464 |
| 217    | 1.75314  | 2.02041 |
| 217.25 | 2.267    | 1.96729 |
| 217.5  | 2.789    | 2.10099 |
| 217.75 | 3.27153  | 2.38171 |
| 218    | 3.6819   | 2.7216  |
| 218.25 | 3.99578  | 3.04012 |
| 218.5  | 4.18411  | 3.27944 |
| 218.75 | 4.22319  | 3.40726 |
| 219    | 4.09562  | 3.41759 |
| 219.25 | 3.80348  | 3.34726 |
| 219.5  | 3.38011  | 3.23221 |
| 219.75 | 2.89409  | 3.1057  |
| 220    | 2.42802  | 2.99761 |
| 220.25 | 2.04293  | 2.93569 |
| 220.5  | 1.77215  | 2.9284  |
| 220.75 | 1.62041  | 2.98917 |
| 221    | 1.56219  | 3.12155 |
| 221.25 | 1.56158  | 3.33243 |
| 221.5  | 1.60217  | 3.62178 |
| 221.75 | 1.68268  | 3.98845 |
| 222    | 1.80761  | 4.41695 |
| 222.25 | 1.99396  | 4.88852 |
| 222.5  | 2.25481  | 5.3615  |
| 222.75 | 2.58696  | 5.77861 |
| 223    | 2.9746   | 6.07929 |
| 223.25 | 3.39519  | 6.21057 |
| 223.5  | 3.80438  | 6.14407 |
| 223.75 | 4.1498   | 5.8845  |
| 224    | 4.38637  | 5.47481 |
| 224.25 | 4.47875  | 4.98069 |
| 224.5  | 4.40759  | 4.48341 |
| 224.75 | 4.19313  | 4.0444  |
| 225    | 3.88393  | 3.71308 |
| 225.25 | 3.53131  | 3.51116 |
| 225.5  | 3.19253  | 3.44074 |
| 225.75 | 2.91611  | 3.47944 |

|        |         |           |
|--------|---------|-----------|
| 226    | 2.7213  | 3.60076   |
| 226.25 | 2.61198 | 3.75822   |
| 226.5  | 2.59492 | 3.91007   |
| 226.75 | 2.66026 | 4.01109   |
| 227    | 2.79889 | 4.03492   |
| 227.25 | 3.00888 | 3.97652   |
| 227.5  | 3.27196 | 3.86628   |
| 227.75 | 3.55845 | 3.73559   |
| 228    | 3.85815 | 3.62828   |
| 228.25 | 4.15561 | 3.56027   |
| 228.5  | 4.43195 | 3.51211   |
| 228.75 | 4.69388 | 3.42423   |
| 229    | 4.95048 | 3.23972   |
| 229.25 | 5.18278 | 2.89791   |
| 229.5  | 5.38545 | 2.38268   |
| 229.75 | 5.56427 | 1.72386   |
| 230    | 5.71496 | 0.991463  |
| 230.25 | 5.85002 | 0.254584  |
| 230.5  | 6.01657 | -0.425369 |
| 230.75 | 6.24313 | -1.03321  |
| 231    | 6.54373 | -1.59667  |
| 231.25 | 6.9319  | -2.18265  |
| 231.5  | 7.39559 | -2.87479  |
| 231.75 | 7.8972  | -3.75133  |
| 232    | 8.4137  | -4.85919  |
| 232.25 | 8.93037 | -6.21824  |
| 232.5  | 9.42384 | -7.80908  |
| 232.75 | 9.88951 | -9.56722  |
| 233    | 10.3354 | -11.4133  |
| 233.25 | 10.7757 | -13.2772  |
| 233.5  | 11.2359 | -15.0887  |
| 233.75 | 11.7695 | -16.7971  |
| 234    | 12.4273 | -18.3957  |
| 234.25 | 13.2521 | -19.8981  |
| 234.5  | 14.2585 | -21.3121  |
| 234.75 | 15.4293 | -22.6586  |
| 235    | 16.7066 | -23.9619  |
| 235.25 | 18.0123 | -25.2263  |
| 235.5  | 19.2648 | -26.4426  |
| 235.75 | 20.4016 | -27.6112  |
| 236    | 21.378  | -28.7236  |
| 236.25 | 22.1719 | -29.7627  |
| 236.5  | 22.7852 | -30.7168  |

|        |         |          |
|--------|---------|----------|
| 236.75 | 23.2328 | -31.589  |
| 237    | 23.5333 | -32.3831 |
| 237.25 | 23.7179 | -33.1095 |
| 237.5  | 23.8316 | -33.7863 |
| 237.75 | 23.9137 | -34.433  |
| 238    | 24.0009 | -35.0552 |
| 238.25 | 24.1257 | -35.6511 |
| 238.5  | 24.3003 | -36.2176 |
| 238.75 | 24.5134 | -36.7492 |
| 239    | 24.7457 | -37.2399 |
| 239.25 | 24.9701 | -37.6924 |
| 239.5  | 25.1546 | -38.1175 |
| 239.75 | 25.2795 | -38.5206 |
| 240    | 25.3392 | -38.9039 |
| 240.25 | 25.3387 | -39.2682 |
| 240.5  | 25.2939 | -39.6096 |
| 240.75 | 25.2285 | -39.9197 |
| 241    | 25.1607 | -40.1983 |
| 241.25 | 25.1024 | -40.4514 |
| 241.5  | 25.0552 | -40.6875 |
| 241.75 | 25.0111 | -40.9184 |
| 242    | 24.9561 | -41.1558 |
| 242.25 | 24.8787 | -41.4041 |
| 242.5  | 24.7712 | -41.66   |
| 242.75 | 24.6322 | -41.917  |
| 243    | 24.4677 | -42.1627 |
| 243.25 | 24.2875 | -42.3854 |
| 243.5  | 24.1002 | -42.5753 |
| 243.75 | 23.9112 | -42.7276 |
| 244    | 23.7244 | -42.8401 |
| 244.25 | 23.5393 | -42.9198 |
| 244.5  | 23.3527 | -42.9775 |
| 244.75 | 23.1626 | -43.0282 |
| 245    | 22.9699 | -43.0887 |
| 245.25 | 22.7742 | -43.1733 |
| 245.5  | 22.5761 | -43.2871 |
| 245.75 | 22.3763 | -43.4244 |
| 246    | 22.1718 | -43.572  |
| 246.25 | 21.9558 | -43.7106 |
| 246.5  | 21.7222 | -43.8218 |
| 246.75 | 21.4657 | -43.8957 |
| 247    | 21.1841 | -43.9349 |
| 247.25 | 20.8818 | -43.9483 |

|        |         |          |
|--------|---------|----------|
| 247.5  | 20.5681 | -43.9505 |
| 247.75 | 20.254  | -43.9552 |
| 248    | 19.9494 | -43.9692 |
| 248.25 | 19.6619 | -43.991  |
| 248.5  | 19.393  | -44.0156 |
| 248.75 | 19.1407 | -44.0343 |
| 249    | 18.901  | -44.0396 |
| 249.25 | 18.67   | -44.0273 |
| 249.5  | 18.4443 | -43.9959 |
| 249.75 | 18.2223 | -43.9437 |
| 250    | 18.0008 | -43.8713 |
| 250.25 | 17.7772 | -43.78   |
| 250.5  | 17.5467 | -43.6706 |
| 250.75 | 17.3034 | -43.544  |
| 251    | 17.0418 | -43.4016 |
| 251.25 | 16.7611 | -43.2421 |
| 251.5  | 16.4613 | -43.0598 |
| 251.75 | 16.1467 | -42.8477 |
| 252    | 15.8246 | -42.5994 |
| 252.25 | 15.503  | -42.3103 |
| 252.5  | 15.1853 | -41.9808 |
| 252.75 | 14.8742 | -41.618  |
| 253    | 14.5693 | -41.2319 |
| 253.25 | 14.2673 | -40.8321 |
| 253.5  | 13.9647 | -40.4236 |
| 253.75 | 13.6617 | -40.0081 |
| 254    | 13.3577 | -39.5819 |
| 254.25 | 13.0542 | -39.1399 |
| 254.5  | 12.7532 | -38.6786 |
| 254.75 | 12.4559 | -38.2005 |
| 255    | 12.1605 | -37.7097 |
| 255.25 | 11.8667 | -37.2121 |
| 255.5  | 11.5725 | -36.7124 |
| 255.75 | 11.2758 | -36.2121 |
| 256    | 10.9753 | -35.7069 |
| 256.25 | 10.6715 | -35.1921 |
| 256.5  | 10.3633 | -34.663  |
| 256.75 | 10.0507 | -34.1182 |
| 257    | 9.73589 | -33.5579 |
| 257.25 | 9.42158 | -32.9854 |
| 257.5  | 9.1108  | -32.4031 |
| 257.75 | 8.8088  | -31.8123 |
| 258    | 8.52121 | -31.2117 |

|        |           |          |
|--------|-----------|----------|
| 258.25 | 8.25147   | -30.6012 |
| 258.5  | 8.00062   | -29.9819 |
| 258.75 | 7.76702   | -29.3583 |
| 259    | 7.54479   | -28.7365 |
| 259.25 | 7.32474   | -28.1248 |
| 259.5  | 7.09717   | -27.5293 |
| 259.75 | 6.85435   | -26.9534 |
| 260    | 6.59186   | -26.3972 |
| 260.25 | 6.31067   | -25.8597 |
| 260.5  | 6.01596   | -25.3377 |
| 260.75 | 5.71574   | -24.8281 |
| 261    | 5.41803   | -24.3276 |
| 261.25 | 5.1301    | -23.8325 |
| 261.5  | 4.85568   | -23.3378 |
| 261.75 | 4.59622   | -22.8408 |
| 262    | 4.35092   | -22.3394 |
| 262.25 | 4.11731   | -21.8342 |
| 262.5  | 3.89076   | -21.3296 |
| 262.75 | 3.66755   | -20.8315 |
| 263    | 3.44456   | -20.3443 |
| 263.25 | 3.22031   | -19.8714 |
| 263.5  | 2.99614   | -19.4132 |
| 263.75 | 2.77653   | -18.967  |
| 264    | 2.5661    | -18.5285 |
| 264.25 | 2.36929   | -18.0955 |
| 264.5  | 2.18797   | -17.6659 |
| 264.75 | 2.02001   | -17.2398 |
| 265    | 1.8599    | -16.8189 |
| 265.25 | 1.70139   | -16.4058 |
| 265.5  | 1.53738   | -16.0013 |
| 265.75 | 1.36314   | -15.6074 |
| 266    | 1.178     | -15.2247 |
| 266.25 | 0.984338  | -14.8545 |
| 266.5  | 0.785602  | -14.4981 |
| 266.75 | 0.587299  | -14.1576 |
| 267    | 0.394322  | -13.8338 |
| 267.25 | 0.208822  | -13.5282 |
| 267.5  | 0.0312864 | -13.2402 |
| 267.75 | -0.137818 | -12.9675 |
| 268    | -0.299794 | -12.7075 |
| 268.25 | -0.456159 | -12.4581 |
| 268.5  | -0.607451 | -12.2168 |
| 268.75 | -0.753425 | -11.982  |

|        |           |          |
|--------|-----------|----------|
| 269    | -0.895489 | -11.7544 |
| 269.25 | -1.0353   | -11.5337 |
| 269.5  | -1.17521  | -11.3188 |
| 269.75 | -1.31729  | -11.1081 |
| 270    | -1.46451  | -10.8998 |
| 270.25 | -1.61725  | -10.6919 |
| 270.5  | -1.7728   | -10.4833 |
| 270.75 | -1.92554  | -10.2752 |
| 271    | -2.06966  | -10.0715 |
| 271.25 | -2.19839  | -9.87698 |
| 271.5  | -2.30758  | -9.69605 |
| 271.75 | -2.3983   | -9.53429 |
| 272    | -2.4776   | -9.39564 |
| 272.25 | -2.55536  | -9.28105 |
| 272.5  | -2.6432   | -9.18973 |
| 272.75 | -2.7514   | -9.12097 |
| 273    | -2.8856   | -9.07033 |
| 273.25 | -3.04348  | -9.03179 |
| 273.5  | -3.21728  | -9.00021 |
| 273.75 | -3.39539  | -8.96908 |
| 274    | -3.56465  | -8.92984 |
| 274.25 | -3.71289  | -8.87638 |
| 274.5  | -3.83434  | -8.80513 |
| 274.75 | -3.92863  | -8.71394 |
| 275    | -3.99954  | -8.60604 |
| 275.25 | -4.05423  | -8.49004 |
| 275.5  | -4.1016   | -8.37593 |
| 275.75 | -4.14646  | -8.2728  |
| 276    | -4.18989  | -8.18727 |
| 276.25 | -4.23133  | -8.1199  |
| 276.5  | -4.26805  | -8.06459 |
| 276.75 | -4.29712  | -8.0123  |
| 277    | -4.32029  | -7.95412 |
| 277.25 | -4.342    | -7.88471 |
| 277.5  | -4.3662   | -7.80369 |
| 277.75 | -4.3976   | -7.71725 |
| 278    | -4.43849  | -7.63356 |
| 278.25 | -4.48539  | -7.561   |
| 278.5  | -4.53363  | -7.50326 |
| 278.75 | -4.57925  | -7.45912 |
| 279    | -4.61781  | -7.42041 |
| 279.25 | -4.64752  | -7.37716 |
| 279.5  | -4.67139  | -7.31762 |

|        |          |             |
|--------|----------|-------------|
| 279.75 | -4.69182 | -7.23354    |
| 280    | -4.71147 | -7.12188    |
| 280.25 | -4.73379 | -6.98611    |
| 280.5  | -4.76147 | -6.83198    |
| 280.75 | -4.79544 | -6.66824    |
| 281    | -4.83881 | -6.50239    |
| 281.25 | -4.89333 | -6.33753    |
| 281.5  | -4.96036 | -6.17252    |
| 281.75 | -5.03873 | -6.00423    |
| 282    | -5.12515 | -5.82708    |
| 282.25 | -5.21199 | -5.63579    |
| 282.5  | -5.29222 | -5.42765    |
| 282.75 | -5.35773 | -5.20157    |
| 283    | -5.40468 | -4.95787    |
| 283.25 | -5.43366 | -4.69873    |
| 283.5  | -5.45026 | -4.42665    |
| 283.75 | -5.46091 | -4.14433    |
| 284    | -5.47311 | -3.85498    |
| 284.25 | -5.49107 | -3.56191    |
| 284.5  | -5.51445 | -3.26759    |
| 284.75 | -5.53979 | -2.97505    |
| 285    | -5.56224 | -2.68681    |
| 285.25 | -5.57824 | -2.40532    |
| 285.5  | -5.58589 | -2.13218    |
| 285.75 | -5.58736 | -1.86867    |
| 286    | -5.58576 | -1.61322    |
| 286.25 | -5.58561 | -1.36277    |
| 286.5  | -5.58912 | -1.11201    |
| 286.75 | -5.59797 | -0.855296   |
| 287    | -5.61106 | -0.58725    |
| 287.25 | -5.62804 | -0.30583    |
| 287.5  | -5.64792 | -0.00984509 |
| 287.75 | -5.67094 | 0.299555    |
| 288    | -5.69742 | 0.621165    |
| 288.25 | -5.7288  | 0.954267    |
| 288.5  | -5.76576 | 1.30127     |
| 288.75 | -5.80932 | 1.66407     |
| 289    | -5.86126 | 2.04642     |
| 289.25 | -5.92311 | 2.45188     |
| 289.5  | -5.99577 | 2.88421     |
| 289.75 | -6.07914 | 3.34485     |
| 290    | -6.17145 | 3.83584     |
| 290.25 | -6.26928 | 4.35675     |

|        |          |         |
|--------|----------|---------|
| 290.5  | -6.37002 | 4.9062  |
| 290.75 | -6.47347 | 5.4806  |
| 291    | -6.58246 | 6.07644 |
| 291.25 | -6.70266 | 6.68885 |
| 291.5  | -6.84015 | 7.31435 |
| 291.75 | -6.99796 | 7.94974 |
| 292    | -7.17355 | 8.59261 |
| 292.25 | -7.35893 | 9.24024 |
| 292.5  | -7.54188 | 9.88988 |
| 292.75 | -7.70985 | 10.5368 |
| 293    | -7.85406 | 11.1754 |
| 293.25 | -7.97085 | 11.8    |
| 293.5  | -8.06237 | 12.4056 |
| 293.75 | -8.13493 | 12.9875 |
| 294    | -8.1966  | 13.5442 |
| 294.25 | -8.25454 | 14.0764 |
| 294.5  | -8.31419 | 14.5858 |
| 294.75 | -8.37781 | 15.0742 |
| 295    | -8.44534 | 15.5443 |
| 295.25 | -8.51475 | 15.9966 |
| 295.5  | -8.58237 | 16.429  |
| 295.75 | -8.64506 | 16.8389 |
| 296    | -8.70141 | 17.2239 |
| 296.25 | -8.75129 | 17.5812 |
| 296.5  | -8.79624 | 17.9101 |
| 296.75 | -8.83902 | 18.2125 |
| 297    | -8.88109 | 18.4924 |
| 297.25 | -8.92169 | 18.7528 |
| 297.5  | -8.95922 | 18.9973 |
| 297.75 | -8.99113 | 19.2285 |
| 298    | -9.01528 | 19.4468 |
| 298.25 | -9.03117 | 19.6505 |
| 298.5  | -9.04054 | 19.8388 |
| 298.75 | -9.04521 | 20.0102 |
| 299    | -9.04728 | 20.1634 |
| 299.25 | -9.0478  | 20.2984 |
| 299.5  | -9.04727 | 20.4167 |
| 299.75 | -9.0454  | 20.5192 |
| 300    | -9.04242 | 20.6081 |
| 300.25 | -9.03803 | 20.6859 |
| 300.5  | -9.03245 | 20.7548 |
| 300.75 | -9.0251  | 20.8162 |
| 301    | -9.01427 | 20.8721 |

|        |          |         |
|--------|----------|---------|
| 301.25 | -8.998   | 20.9237 |
| 301.5  | -8.97619 | 20.9714 |
| 301.75 | -8.94968 | 21.0165 |
| 302    | -8.92128 | 21.0598 |
| 302.25 | -8.8962  | 21.1012 |
| 302.5  | -8.87953 | 21.1408 |
| 302.75 | -8.87364 | 21.1788 |
| 303    | -8.87829 | 21.2138 |
| 303.25 | -8.89054 | 21.2448 |
| 303.5  | -8.90479 | 21.2708 |
| 303.75 | -8.9156  | 21.29   |
| 304    | -8.91953 | 21.3007 |
| 304.25 | -8.91595 | 21.3022 |
| 304.5  | -8.90673 | 21.2942 |
| 304.75 | -8.8957  | 21.2779 |
| 305    | -8.88657 | 21.2548 |
| 305.25 | -8.88214 | 21.2272 |
| 305.5  | -8.88347 | 21.1966 |
| 305.75 | -8.88951 | 21.1639 |
| 306    | -8.89781 | 21.1285 |
| 306.25 | -8.90573 | 21.0895 |
| 306.5  | -8.91075 | 21.0463 |
| 306.75 | -8.9115  | 20.9982 |
| 307    | -8.90891 | 20.9448 |
| 307.25 | -8.9056  | 20.8862 |
| 307.5  | -8.90531 | 20.8222 |
| 307.75 | -8.91226 | 20.7521 |
| 308    | -8.92942 | 20.6756 |
| 308.25 | -8.95709 | 20.5931 |
| 308.5  | -8.99312 | 20.5057 |
| 308.75 | -9.03319 | 20.4146 |
| 309    | -9.07202 | 20.3214 |
| 309.25 | -9.10496 | 20.2273 |
| 309.5  | -9.12949 | 20.1322 |
| 309.75 | -9.14547 | 20.0352 |
| 310    | -9.15491 | 19.9356 |
| 310.25 | -9.16051 | 19.8323 |
| 310.5  | -9.16525 | 19.7248 |
| 310.75 | -9.17102 | 19.6132 |
| 311    | -9.17793 | 19.4984 |
| 311.25 | -9.18457 | 19.3808 |
| 311.5  | -9.18907 | 19.2615 |
| 311.75 | -9.18869 | 19.1415 |

|        |          |         |
|--------|----------|---------|
| 312    | -9.18074 | 19.0205 |
| 312.25 | -9.16365 | 18.8978 |
| 312.5  | -9.13682 | 18.7724 |
| 312.75 | -9.10049 | 18.6424 |
| 313    | -9.05634 | 18.5057 |
| 313.25 | -9.00714 | 18.3617 |
| 313.5  | -8.95569 | 18.2111 |
| 313.75 | -8.90484 | 18.0547 |
| 314    | -8.8566  | 17.8949 |
| 314.25 | -8.81188 | 17.7342 |
| 314.5  | -8.77012 | 17.5737 |
| 314.75 | -8.73007 | 17.413  |
| 315    | -8.68961 | 17.2509 |
| 315.25 | -8.64709 | 17.0848 |
| 315.5  | -8.60136 | 16.9116 |
| 315.75 | -8.55224 | 16.7294 |
| 316    | -8.5003  | 16.5377 |
| 316.25 | -8.44696 | 16.3372 |
| 316.5  | -8.39347 | 16.1301 |
| 316.75 | -8.34085 | 15.9198 |
| 317    | -8.28914 | 15.7092 |
| 317.25 | -8.23768 | 15.5003 |
| 317.5  | -8.18488 | 15.294  |
| 317.75 | -8.12886 | 15.09   |
| 318    | -8.06747 | 14.8867 |
| 318.25 | -7.9996  | 14.6829 |
| 318.5  | -7.92475 | 14.4771 |
| 318.75 | -7.84348 | 14.2684 |
| 319    | -7.75708 | 14.0564 |
| 319.25 | -7.66793 | 13.8409 |
| 319.5  | -7.57793 | 13.6214 |
| 319.75 | -7.48886 | 13.3976 |
| 320    | -7.40172 | 13.1689 |
| 320.25 | -7.31656 | 12.935  |
| 320.5  | -7.23187 | 12.6961 |
| 320.75 | -7.14581 | 12.4528 |
| 321    | -7.0559  | 12.2068 |
| 321.25 | -6.96006 | 11.9602 |
| 321.5  | -6.85726 | 11.7153 |
| 321.75 | -6.74819 | 11.4746 |
| 322    | -6.63459 | 11.2402 |
| 322.25 | -6.51936 | 11.0129 |
| 322.5  | -6.40557 | 10.7924 |

|        |          |         |
|--------|----------|---------|
| 322.75 | -6.2955  | 10.5773 |
| 323    | -6.19001 | 10.3649 |
| 323.25 | -6.08879 | 10.1522 |
| 323.5  | -5.99043 | 9.9364  |
| 323.75 | -5.89296 | 9.71614 |
| 324    | -5.79455 | 9.49087 |
| 324.25 | -5.69413 | 9.26134 |
| 324.5  | -5.59142 | 9.0291  |
| 324.75 | -5.4868  | 8.79577 |
| 325    | -5.38117 | 8.5622  |
| 325.25 | -5.27583 | 8.32895 |
| 325.5  | -5.17167 | 8.09632 |
| 325.75 | -5.06913 | 7.86476 |
| 326    | -4.96815 | 7.63511 |
| 326.25 | -4.86823 | 7.4091  |
| 326.5  | -4.76834 | 7.18844 |
| 326.75 | -4.66797 | 6.97439 |
| 327    | -4.56668 | 6.76733 |
| 327.25 | -4.46459 | 6.56662 |
| 327.5  | -4.36225 | 6.37027 |
| 327.75 | -4.26061 | 6.17611 |
| 328    | -4.16017 | 5.98222 |
| 328.25 | -4.06154 | 5.7873  |
| 328.5  | -3.96505 | 5.59064 |
| 328.75 | -3.87068 | 5.3929  |
| 329    | -3.77819 | 5.19491 |
| 329.25 | -3.68751 | 4.99769 |
| 329.5  | -3.59847 | 4.80208 |
| 329.75 | -3.51104 | 4.60902 |
| 330    | -3.42537 | 4.4187  |
| 330.25 | -3.3418  | 4.23134 |
| 330.5  | -3.26091 | 4.04719 |
| 330.75 | -3.18347 | 3.86665 |
| 331    | -3.10991 | 3.6899  |
| 331.25 | -3.04042 | 3.51734 |
| 331.5  | -2.97468 | 3.3493  |
| 331.75 | -2.91157 | 3.18594 |
| 332    | -2.84927 | 3.0274  |
| 332.25 | -2.78602 | 2.87403 |
| 332.5  | -2.72018 | 2.72623 |
| 332.75 | -2.65068 | 2.58442 |
| 333    | -2.57744 | 2.44881 |
| 333.25 | -2.50136 | 2.31925 |

|        |          |            |
|--------|----------|------------|
| 333.5  | -2.42387 | 2.19522    |
| 333.75 | -2.34677 | 2.07604    |
| 334    | -2.27178 | 1.96072    |
| 334.25 | -2.20022 | 1.84856    |
| 334.5  | -2.13301 | 1.73867    |
| 334.75 | -2.07059 | 1.63016    |
| 335    | -2.01289 | 1.52203    |
| 335.25 | -1.95971 | 1.41387    |
| 335.5  | -1.9108  | 1.30536    |
| 335.75 | -1.8656  | 1.19733    |
| 336    | -1.82362 | 1.0912     |
| 336.25 | -1.78455 | 0.988725   |
| 336.5  | -1.74789 | 0.89123    |
| 336.75 | -1.713   | 0.799778   |
| 337    | -1.67948 | 0.714189   |
| 337.25 | -1.64693 | 0.63364    |
| 337.5  | -1.61492 | 0.55717    |
| 337.75 | -1.58335 | 0.483729   |
| 338    | -1.55256 | 0.412105   |
| 338.25 | -1.52315 | 0.341578   |
| 338.5  | -1.4959  | 0.271388   |
| 338.75 | -1.47168 | 0.200619   |
| 339    | -1.45122 | 0.128642   |
| 339.25 | -1.43444 | 0.0556335  |
| 339.5  | -1.42054 | -0.0178873 |
| 339.75 | -1.40799 | -0.0905596 |
| 340    | -1.395   | -0.160525  |
| 340.25 | -1.37951 | -0.225745  |
| 340.5  | -1.36049 | -0.284993  |
| 340.75 | -1.33781 | -0.33741   |
| 341    | -1.31254 | -0.382891  |
| 341.25 | -1.2862  | -0.421581  |
| 341.5  | -1.26087 | -0.454193  |
| 341.75 | -1.23786 | -0.481171  |
| 342    | -1.21774 | -0.503317  |
| 342.25 | -1.20002 | -0.521585  |
| 342.5  | -1.18387 | -0.537498  |
| 342.75 | -1.16796 | -0.552323  |
| 343    | -1.15138 | -0.56725   |
| 343.25 | -1.13378 | -0.582626  |
| 343.5  | -1.11538 | -0.598137  |
| 343.75 | -1.09687 | -0.612789  |
| 344    | -1.07944 | -0.625648  |

|        |           |           |
|--------|-----------|-----------|
| 344.25 | -1.06429  | -0.636275 |
| 344.5  | -1.05257  | -0.645335 |
| 344.75 | -1.04541  | -0.654377 |
| 345    | -1.04312  | -0.665223 |
| 345.25 | -1.04531  | -0.679707 |
| 345.5  | -1.0509   | -0.698778 |
| 345.75 | -1.05797  | -0.722103 |
| 346    | -1.06386  | -0.748143 |
| 346.25 | -1.06642  | -0.775028 |
| 346.5  | -1.06415  | -0.80016  |
| 346.75 | -1.05635  | -0.821401 |
| 347    | -1.04355  | -0.837409 |
| 347.25 | -1.0276   | -0.847653 |
| 347.5  | -1.01062  | -0.851881 |
| 347.75 | -0.99465  | -0.851035 |
| 348    | -0.981515 | -0.846206 |
| 348.25 | -0.972397 | -0.838505 |
| 348.5  | -0.967319 | -0.829291 |
| 348.75 | -0.965645 | -0.820422 |
| 349    | -0.966417 | -0.81342  |
| 349.25 | -0.968383 | -0.809917 |
| 349.5  | -0.969901 | -0.811184 |
| 349.75 | -0.969684 | -0.817462 |
| 350    | -0.966685 | -0.827749 |
| 350.25 | -0.959716 | -0.839857 |
| 350.5  | -0.947917 | -0.850595 |
| 350.75 | -0.931526 | -0.857004 |
| 351    | -0.911414 | -0.857215 |
| 351.25 | -0.889199 | -0.850521 |
| 351.5  | -0.867636 | -0.838036 |
| 351.75 | -0.849677 | -0.822379 |
| 352    | -0.83733  | -0.806161 |
| 352.25 | -0.83153  | -0.791312 |
| 352.5  | -0.831834 | -0.779251 |
| 352.75 | -0.836168 | -0.770279 |
| 353    | -0.841721 | -0.763532 |
| 353.25 | -0.845948 | -0.758016 |
| 353.5  | -0.847002 | -0.752828 |
| 353.75 | -0.844066 | -0.746936 |
| 354    | -0.837569 | -0.739547 |
| 354.25 | -0.828645 | -0.730432 |
| 354.5  | -0.818381 | -0.719576 |
| 354.75 | -0.807761 | -0.707558 |

|        |           |           |
|--------|-----------|-----------|
| 355    | -0.797549 | -0.695473 |
| 355.25 | -0.787923 | -0.684368 |
| 355.5  | -0.778655 | -0.675013 |
| 355.75 | -0.769886 | -0.668014 |
| 356    | -0.761692 | -0.66311  |
| 356.25 | -0.754004 | -0.659727 |
| 356.5  | -0.747082 | -0.657666 |
| 356.75 | -0.741838 | -0.657106 |
| 357    | -0.73894  | -0.658397 |
| 357.25 | -0.739058 | -0.662406 |
| 357.5  | -0.742927 | -0.669578 |
| 357.75 | -0.750882 | -0.679428 |
| 358    | -0.761911 | -0.690668 |
| 358.25 | -0.774378 | -0.701245 |
| 358.5  | -0.786449 | -0.708712 |
| 358.75 | -0.79602  | -0.711179 |
| 359    | -0.801032 | -0.707723 |
| 359.25 | -0.800511 | -0.698154 |
| 359.5  | -0.794368 | -0.683449 |
| 359.75 | -0.782765 | -0.665088 |
| 360    | -0.766364 | -0.644553 |
| 360.25 | -0.746568 | -0.623215 |
| 360.5  | -0.725175 | -0.602823 |
| 360.75 | -0.704092 | -0.584792 |
| 361    | -0.68547  | -0.570675 |
| 361.25 | -0.671405 | -0.561996 |
| 361.5  | -0.663065 | -0.559686 |
| 361.75 | -0.660351 | -0.563403 |
| 362    | -0.662165 | -0.571843 |
| 362.25 | -0.6669   | -0.582566 |
| 362.5  | -0.672391 | -0.592552 |
| 362.75 | -0.676923 | -0.599151 |
| 363    | -0.679434 | -0.600487 |
| 363.25 | -0.679644 | -0.596009 |
| 363.5  | -0.677308 | -0.586361 |
| 363.75 | -0.672556 | -0.572814 |
| 364    | -0.665251 | -0.556674 |
| 364.25 | -0.655424 | -0.539623 |
| 364.5  | -0.642971 | -0.522581 |
| 364.75 | -0.628374 | -0.506245 |
| 365    | -0.612584 | -0.491509 |
| 365.25 | -0.597179 | -0.479299 |
| 365.5  | -0.583592 | -0.469504 |

|        |           |           |
|--------|-----------|-----------|
| 365.75 | -0.573181 | -0.462153 |
| 366    | -0.566758 | -0.456721 |
| 366.25 | -0.564076 | -0.451843 |
| 366.5  | -0.564066 | -0.446136 |
| 366.75 | -0.565434 | -0.43944  |
| 367    | -0.566785 | -0.431812 |
| 367.25 | -0.56664  | -0.423857 |
| 367.5  | -0.564518 | -0.41707  |
| 367.75 | -0.560554 | -0.412818 |
| 368    | -0.555184 | -0.411452 |
| 368.25 | -0.54909  | -0.413126 |
| 368.5  | -0.54352  | -0.417796 |
| 368.75 | -0.539087 | -0.424471 |
| 369    | -0.535885 | -0.431916 |
| 369.25 | -0.533739 | -0.439181 |
| 369.5  | -0.531982 | -0.444766 |
| 369.75 | -0.529234 | -0.446951 |
| 370    | -0.524279 | -0.444948 |
| 370.25 | -0.516476 | -0.438615 |
| 370.5  | -0.505404 | -0.42799  |
| 370.75 | -0.491372 | -0.414433 |
| 371    | -0.475261 | -0.399574 |
| 371.25 | -0.45803  | -0.384338 |
| 371.5  | -0.439992 | -0.369089 |
| 371.75 | -0.421341 | -0.35423  |
| 372    | -0.401744 | -0.338926 |
| 372.25 | -0.380745 | -0.322549 |
| 372.5  | -0.358238 | -0.305134 |
| 372.75 | -0.335148 | -0.287218 |
| 373    | -0.312827 | -0.269284 |
| 373.25 | -0.293195 | -0.252781 |
| 373.5  | -0.278261 | -0.238877 |
| 373.75 | -0.269359 | -0.228238 |
| 374    | -0.266559 | -0.221037 |
| 374.25 | -0.269051 | -0.217348 |
| 374.5  | -0.274983 | -0.216435 |
| 374.75 | -0.282036 | -0.217553 |
| 375    | -0.288318 | -0.22021  |
| 375.25 | -0.292832 | -0.224372 |
| 375.5  | -0.295258 | -0.229788 |
| 375.75 | -0.296198 | -0.236439 |
| 376    | -0.296437 | -0.2441   |
| 376.25 | -0.296263 | -0.252038 |

|        |           |            |
|--------|-----------|------------|
| 376.5  | -0.29531  | -0.258776  |
| 376.75 | -0.29307  | -0.263421  |
| 377    | -0.288768 | -0.265524  |
| 377.25 | -0.282198 | -0.264958  |
| 377.5  | -0.27408  | -0.262425  |
| 377.75 | -0.266116 | -0.259589  |
| 378    | -0.26003  | -0.257324  |
| 378.25 | -0.257477 | -0.255624  |
| 378.5  | -0.259223 | -0.25446   |
| 378.75 | -0.264989 | -0.252966  |
| 379    | -0.272911 | -0.249299  |
| 379.25 | -0.280684 | -0.242473  |
| 379.5  | -0.285813 | -0.232504  |
| 379.75 | -0.286571 | -0.219496  |
| 380    | -0.282047 | -0.204378  |
| 380.25 | -0.273294 | -0.189292  |
| 380.5  | -0.262263 | -0.175922  |
| 380.75 | -0.251526 | -0.165431  |
| 381    | -0.243059 | -0.158472  |
| 381.25 | -0.238204 | -0.154993  |
| 381.5  | -0.236578 | -0.153482  |
| 381.75 | -0.23683  | -0.152267  |
| 382    | -0.236759 | -0.14948   |
| 382.25 | -0.234566 | -0.143927  |
| 382.5  | -0.228978 | -0.134909  |
| 382.75 | -0.219588 | -0.123056  |
| 383    | -0.206788 | -0.109595  |
| 383.25 | -0.191879 | -0.096445  |
| 383.5  | -0.176224 | -0.0851387 |
| 383.75 | -0.161051 | -0.0769441 |
| 384    | -0.147821 | -0.0723995 |
| 384.25 | -0.137689 | -0.0714281 |
| 384.5  | -0.1311   | -0.0731481 |
| 384.75 | -0.128039 | -0.0767773 |
| 385    | -0.128241 | -0.0816432 |
| 385.25 | -0.130665 | -0.0871315 |
| 385.5  | -0.133951 | -0.0928341 |
| 385.75 | -0.137006 | -0.0987546 |
| 386    | -0.139159 | -0.104634  |
| 386.25 | -0.140011 | -0.109857  |
| 386.5  | -0.139534 | -0.113675  |
| 386.75 | -0.13816  | -0.115287  |
| 387    | -0.136191 | -0.11379   |

|        |             |             |
|--------|-------------|-------------|
| 387.25 | -0.133579   | -0.108568   |
| 387.5  | -0.129957   | -0.0995406  |
| 387.75 | -0.125116   | -0.0871652  |
| 388    | -0.118569   | -0.0720858  |
| 388.25 | -0.11006    | -0.0551418  |
| 388.5  | -0.0998175  | -0.03736    |
| 388.75 | -0.0885398  | -0.0195984  |
| 389    | -0.0769277  | -0.00246178 |
| 389.25 | -0.0661897  | 0.0132705   |
| 389.5  | -0.0575787  | 0.0269451   |
| 389.75 | -0.0518888  | 0.0383097   |
| 390    | -0.0495726  | 0.0470689   |
| 390.25 | -0.0504419  | 0.0532138   |
| 390.5  | -0.0532367  | 0.0573472   |
| 390.75 | -0.0562483  | 0.0598706   |
| 391    | -0.0580735  | 0.060728    |
| 391.25 | -0.0573276  | 0.0602193   |
| 391.5  | -0.0536657  | 0.0581839   |
| 391.75 | -0.0478929  | 0.0540727   |
| 392    | -0.0411339  | 0.0481179   |
| 392.25 | -0.0341631  | 0.0414254   |
| 392.5  | -0.0280099  | 0.0346716   |
| 392.75 | -0.022858   | 0.0288905   |
| 393    | -0.0183437  | 0.0249877   |
| 393.25 | -0.0140436  | 0.0228684   |
| 393.5  | -0.00975019 | 0.0214808   |
| 393.75 | -0.00457557 | 0.020137    |
| 394    | 0.00204967  | 0.0182388   |
| 394.25 | 0.0106545   | 0.0158815   |
| 394.5  | 0.0215129   | 0.0140088   |
| 394.75 | 0.0345583   | 0.0142816   |
| 395    | 0.0484996   | 0.018225    |
| 395.25 | 0.0620349   | 0.0270019   |
| 395.5  | 0.0740003   | 0.0407958   |
| 395.75 | 0.0837929   | 0.0589532   |
| 396    | 0.0915142   | 0.080148    |
| 396.25 | 0.0984598   | 0.102717    |
| 396.5  | 0.105847    | 0.125137    |
| 396.75 | 0.114422    | 0.14645     |
| 397    | 0.124195    | 0.166181    |
| 397.25 | 0.134491    | 0.184168    |
| 397.5  | 0.144047    | 0.200482    |
| 397.75 | 0.151672    | 0.214716    |

|        |          |          |
|--------|----------|----------|
| 398    | 0.156474 | 0.226076 |
| 398.25 | 0.158173 | 0.233567 |
| 398.5  | 0.156911 | 0.236359 |
| 398.75 | 0.152823 | 0.233659 |
| 399    | 0.14631  | 0.226219 |
| 399.25 | 0.137941 | 0.214757 |
| 399.5  | 0.127972 | 0.201628 |
| 399.75 | 0.11726  | 0.186913 |
| 400    | 0.105198 | 0.173797 |

#### Item 4. Energy computations for 32 enantiomers of 3 and 4 at the B3LYP/6-31G(d) level

The products formed in the reactions have six stereogenic centers. Thus, it has 64 enantiomers ( $2^6$ ). Theoretically, half of 64 enantiomers need to be investigated for their relative energy study.

Optimizations for all 32 compounds were performed using well-known density functional theory (DFT), such as at the B3LYP/6-31G(d) level in the gas phase. The energy data are in au. and their relative energy values in kcal/mol are listed below the corresponding geometries. It could be found that compound DL-9 had the lowest energy among all the 32 compounds. LL-8 had the lowest energy in series of 16 compounds named as LL-1 to LL-16. The specific data are illustrated in the corresponding sections below.

**Table S4 The specific isomer structures and their energetics.**

|                                                                                     |                                                                                                 |                                                                                      |                                                                                       |
|-------------------------------------------------------------------------------------|-------------------------------------------------------------------------------------------------|--------------------------------------------------------------------------------------|---------------------------------------------------------------------------------------|
| 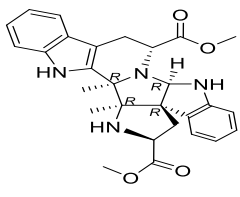   |                |    |    |
| DL-1<br>E=-1604.923486 (au)<br>$\Delta E=24.529$ kcal/mol                           | DL-2<br>E=-1604.919527 (au)<br>$\Delta E=27.013$ kcal/mol                                       | DL-3<br>E=-1604.820336 (au)<br>$\Delta E=89.256$ kcal/mol                            | DL-4<br>E=-1604.947719 (au)<br>$\Delta E=9.323$ kcal/mol                              |
|  |              |  |  |
| DL-5<br>E=-1604.824436 (au)<br>$\Delta E=86.683$ kcal/mol                           | DL-6 (( <i>R,S</i> )-3( <i>I</i> ) in text)<br>E=-1604.960288 (au)<br>$\Delta E=1.436$ kcal/mol | DL-7<br>E=-1604.929503 (au)<br>$\Delta E=20.753$ kcal/mol                            | DL-8<br>E=-1604.922946 (au)<br>$\Delta E=24.868$ kcal/mol                             |
|  |              |  |  |
| DL-9<br>E=-1604.962576 (au)<br>$\Delta E=0.000$ kcal/mol                            | DL-10<br>E=-1604.810426 (au)<br>$\Delta E=95.474$ kcal/mol                                      | DL-11<br>E=-1604.955313 (au)<br>$\Delta E=4.558$ kcal/mol                            | DL-12<br>E=-1604.820019 (au)<br>$\Delta E=89.455$ kcal/mol                            |

Table S4 Continued

|                                                                                     |                                                                                     |                                                                                      |                                                                                       |
|-------------------------------------------------------------------------------------|-------------------------------------------------------------------------------------|--------------------------------------------------------------------------------------|---------------------------------------------------------------------------------------|
| 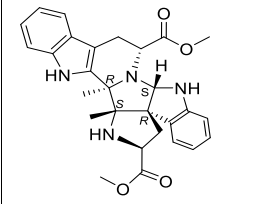   |    |    |    |
| DL-13<br>E=-1604.927585 (au)<br>$\Delta E=21.957$ kcal/mol                          | DL-14<br>E=-1604.926568 (au)<br>$\Delta E=22.595$ kcal/mol                          | DL-15<br>E=-1604.928717 (au)<br>$\Delta E=21.247$ kcal/mol                           | DL-16<br>E=-1604.925409 (au)<br>$\Delta E=23.322$ kcal/mol                            |
|    |    |    |    |
| LL-1<br>E=-1604.919621 (au)<br>$\Delta E=26.954$ kcal/mol                           | LL-2<br>E=-1604.922976 (au)<br>$\Delta E=24.849$ kcal/mol                           | LL-3<br>E=-1604.822613 (au)<br>$\Delta E=87.827$ kcal/mol                            | LL-4<br>E=-1604.958986 (au)<br>$\Delta E=2.253$ kcal/mol                              |
|  |  |  |  |
| LL-5<br>E=-1604.816599 (au)<br>$\Delta E=91.601$ kcal/mol                           | LL-6((S,S)-4(I) in text)<br>E=-1604.961737 (au)<br>$\Delta E=0.526$ kcal/mol        | LL-7<br>E=-1604.922153 (au)<br>$\Delta E=25.365$ kcal/mol                            | LL-8<br>E=-1604.925961 (au)<br>$\Delta E=22.976$ kcal/mol                             |
|  |  |  |  |
| LL-9((S,S)-4(2) in text)<br>E=-1604.959764 (au)<br>$\Delta E=1.765$ kcal/mol        | LL-10<br>E=-1604.817760 (au)<br>$\Delta E=90.872$ kcal/mol                          | LL-11<br>E=-1604.952776 (au)<br>$\Delta E=6.149$ kcal/mol                            | LL-12<br>E=-1604.817929 (au)<br>$\Delta E=90.766$ kcal/mol                            |

**Table S4 Continued**

|                                                                                   |                                                                                   |                                                                                    |                                                                                     |
|-----------------------------------------------------------------------------------|-----------------------------------------------------------------------------------|------------------------------------------------------------------------------------|-------------------------------------------------------------------------------------|
| 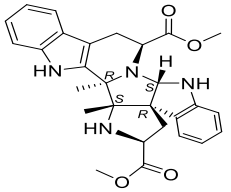 |  |  |  |
| LL-13<br>E=-1604.925895 (au)<br>$\Delta E=23.017$ kcal/mol                        | LL-14<br>E=-1604.933716 (au)<br>$\Delta E=18.110$ kcal/mol                        | LL-15<br>E=-1604.925049 (au)<br>$\Delta E=23.548$ kcal/mol                         | LL-16<br>E=-1604.928409 (au)<br>$\Delta E=21.440$ kcal/mol                          |

**Note:** DL-6, DL-9, LL-8 and LL-9 are the numbers for series of energy investigations for **3** and **4**. They are corresponding to the compound numbers of (*R,S*)-**3**(1), (*R,S*)-**3**(2), (*S,S*)-**4**(1) and (*S,S*)-**4**(2) in the paper text.

## Item 5. Computations of five enantiomers of **3** and **4**: Energies, coordinates at three different quantum levels

The following five geometries were optimized at the B3LYP/6-311+G(d) level in the gas phase first. Then, these compounds named as **LL-8**, **LL-9**, **DL-6** and **DL-9** were used in further calculations at the levels of B3LYP/6-311++G(2d,p) in the gas phase and in solution (CH<sub>2</sub>Cl<sub>2</sub>) using PCM model. The lowest energy conformation is **LL-8**. **DL-9** had the second lowest energy. The specific data are listed below the corresponding geometries.

Energy unit of E is au.  $\Delta E$  unit is in kcal/mol.

Table S5 The predicted relative energy for the four isomers of **3** and **4**.

|                                                                                                                                                                                                           |                                                                                                                                                                                                           |
|-----------------------------------------------------------------------------------------------------------------------------------------------------------------------------------------------------------|-----------------------------------------------------------------------------------------------------------------------------------------------------------------------------------------------------------|
| 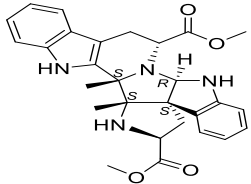                                                                                                                         |                                                                                                                          |
| DL-6 (( <i>R,S</i> )- <b>3(I)</b> ) in paper<br>E <sub>1</sub> =-1605.342488, $\Delta E_1=1.730$<br>E <sub>2</sub> =-1605.425883, $\Delta E_2=1.751$<br>E <sub>3</sub> =-1605.4415281, $\Delta E_3=1.452$ | DL-9 (( <i>R,S</i> )- <b>3(2)</b> ) in paper<br>E <sub>1</sub> =-1605.344416, $\Delta E_1=0.520$<br>E <sub>2</sub> =-1605.427947, $\Delta E_2=0.456$<br>E <sub>3</sub> =-1605.442763, $\Delta E_3=0.677$  |
|                                                                                                                        |                                                                                                                        |
| LL-6 (( <i>S,S</i> )- <b>4(I)</b> ) in paper<br>E <sub>1</sub> =-1605.345244, $\Delta E_1=0.000$<br>E <sub>2</sub> =-1605.428674, $\Delta E_2=0.000$<br>E <sub>3</sub> =-1605.443842, $\Delta E_3=0.000$  | LL-9 (( <i>S,S</i> )- <b>4(2)</b> ) in paper<br>E <sub>1</sub> =-1605.341896, $\Delta E_1=2.101$<br>E <sub>2</sub> =-1605.425447, $\Delta E_2=2.025$<br>E <sub>3</sub> =-1605.4412202, $\Delta E_3=1.645$ |

Table S6 The summarized energetics and yields for the four compounds.

| Computational method  | ( <i>R,S</i> )- <b>3(I)</b><br>$\Delta E^d$ / yield (%) <sup>c</sup> | ( <i>R,S</i> )- <b>3(2)</b><br>$\Delta E^d$ / yield (%) <sup>c</sup> | ( <i>S,S</i> )- <b>4(I)</b><br>$\Delta E^d$ / yield (%) <sup>c</sup> | ( <i>S,S</i> )- <b>4(2)</b><br>$\Delta E^d$ / yield (%) <sup>c</sup> |
|-----------------------|----------------------------------------------------------------------|----------------------------------------------------------------------|----------------------------------------------------------------------|----------------------------------------------------------------------|
| Method 1 <sup>a</sup> | 1.730 / 3.5                                                          | 0.520 / 27.7                                                         | 0.000 / 66.8                                                         | 2.101 / 2.0                                                          |
| Method 2 <sup>b</sup> | 1.751 / 3.3                                                          | 0.456 / 29.9                                                         | 0.000 / 64.6                                                         | 2.025 / 2.1                                                          |
| Method 3 <sup>c</sup> | 1.452 / 5.8                                                          | 0.677 / 21.7                                                         | 0.000 / 68.3                                                         | 1.645 / 4.2                                                          |

<sup>a</sup>Optimizations at the B3LYP/6-311+G(d) level in the gas phase. <sup>b</sup>At the B3LYP/6-311++G(2d,p) level in the gas phase. <sup>c</sup>At the B3LYP/6-311++G(2d,p) level in CH<sub>2</sub>Cl<sub>2</sub> using PCM model.

<sup>d</sup>Relative energy ( $\Delta E$ ) unit: kcal/mol. <sup>e</sup>These are the predicted yields based on the calculated  $\Delta E$  values.

**Item 6. Coordinates for the four low energy compounds at the B3LYP/6-311++G(2d,p) level in CH<sub>2</sub>Cl<sub>2</sub> using PCM.**

Table S7 Coordinates for (*R,S*)-3(2) (=DL-9 in SM)

Standard orientation:

| Center<br>Number | Atomic<br>Number | Atomic<br>Type | Coordinates (Angstroms) |           |           |
|------------------|------------------|----------------|-------------------------|-----------|-----------|
|                  |                  |                | X                       | Y         | Z         |
| 1                | 6                | 0              | -4.907581               | -2.473706 | 0.215170  |
| 2                | 6                | 0              | -3.787241               | -1.729434 | -0.156576 |
| 3                | 6                | 0              | -3.895612               | -0.411955 | -0.676259 |
| 4                | 6                | 0              | -5.169648               | 0.151360  | -0.845309 |
| 5                | 6                | 0              | -6.286758               | -0.589642 | -0.483235 |
| 6                | 6                | 0              | -6.156493               | -1.887482 | 0.045582  |
| 7                | 6                | 0              | -2.550769               | 0.046005  | -0.903467 |
| 8                | 6                | 0              | -1.702976               | -0.959573 | -0.536430 |
| 9                | 7                | 0              | -2.442327               | -2.058483 | -0.119664 |
| 10               | 1                | 0              | -2.067974               | -2.802884 | 0.445180  |
| 11               | 6                | 0              | -2.023320               | 1.330124  | -1.445020 |
| 12               | 6                | 0              | -0.645946               | 1.610455  | -0.800936 |
| 13               | 6                | 0              | -0.064271               | 2.846311  | -1.494739 |
| 14               | 8                | 0              | -0.706942               | 3.952402  | -1.072364 |
| 15               | 6                | 0              | -0.305442               | 5.193163  | -1.679847 |
| 16               | 7                | 0              | 0.268436                | 0.473028  | -0.895707 |
| 17               | 6                | 0              | -0.208439               | -0.937997 | -0.737653 |
| 18               | 6                | 0              | 0.606461                | -1.481533 | 0.489193  |
| 19               | 1                | 0              | -1.922460               | 1.294586  | -2.538011 |
| 20               | 1                | 0              | -2.686000               | 2.166699  | -1.212230 |
| 21               | 1                | 0              | -0.828418               | 1.898620  | 0.245482  |
| 22               | 1                | 0              | -0.918186               | 5.958169  | -1.208604 |
| 23               | 1                | 0              | 0.752609                | 5.382178  | -1.496027 |
| 24               | 1                | 0              | -0.484006               | 5.167858  | -2.755456 |
| 25               | 6                | 0              | 1.557054                | 0.669020  | -0.228580 |
| 26               | 6                | 0              | 1.957375                | -0.682570 | 0.456801  |
| 27               | 6                | 0              | 2.330750                | -0.543671 | 1.945117  |
| 28               | 6                | 0              | 0.974023                | -0.601058 | 2.713295  |
| 29               | 6                | 0              | 0.594455                | 0.744136  | 3.313527  |
| 30               | 7                | 0              | -0.037993               | -1.052966 | 1.755327  |
| 31               | 1                | 0              | -0.702660               | -0.302398 | 1.592629  |
| 32               | 8                | 0              | -0.236593               | 1.499337  | 2.863663  |
| 33               | 8                | 0              | 1.315942                | 1.002491  | 4.417220  |
| 34               | 6                | 0              | 1.069908                | 2.268709  | 5.058142  |
| 35               | 1                | 0              | 1.735508                | 2.292136  | 5.917663  |

|    |   |   |           |           |           |
|----|---|---|-----------|-----------|-----------|
| 36 | 1 | 0 | 1.293776  | 3.090582  | 4.377289  |
| 37 | 1 | 0 | 0.029245  | 2.337116  | 5.375750  |
| 38 | 1 | 0 | 2.901740  | 0.365830  | 2.142664  |
| 39 | 1 | 0 | 2.964120  | -1.378811 | 2.251175  |
| 40 | 1 | 0 | 1.063893  | -1.300470 | 3.550643  |
| 41 | 7 | 0 | 2.674455  | 0.973051  | -1.133039 |
| 42 | 6 | 0 | 3.114562  | -1.166189 | -0.401417 |
| 43 | 6 | 0 | 3.866763  | -2.333615 | -0.349583 |
| 44 | 6 | 0 | 3.443413  | -0.164477 | -1.329526 |
| 45 | 6 | 0 | 4.908897  | -2.528899 | -1.263180 |
| 46 | 1 | 0 | 3.654156  | -3.102850 | 0.385960  |
| 47 | 6 | 0 | 4.472867  | -0.353082 | -2.254590 |
| 48 | 6 | 0 | 5.194326  | -1.546343 | -2.213112 |
| 49 | 1 | 0 | 5.492158  | -3.443064 | -1.232143 |
| 50 | 1 | 0 | 4.717198  | 0.418711  | -2.977812 |
| 51 | 1 | 0 | 5.999144  | -1.704920 | -2.924587 |
| 52 | 1 | 0 | 2.423322  | 1.548347  | -1.926972 |
| 53 | 1 | 0 | 1.460481  | 1.487501  | 0.493757  |
| 54 | 1 | 0 | -4.812329 | -3.477914 | 0.617223  |
| 55 | 1 | 0 | -7.047002 | -2.442496 | 0.322695  |
| 56 | 1 | 0 | -7.277467 | -0.164119 | -0.607338 |
| 57 | 1 | 0 | -5.283561 | 1.152714  | -1.249611 |
| 58 | 8 | 0 | 0.814161  | 2.873042  | -2.324525 |
| 59 | 6 | 0 | 0.107366  | -1.718255 | -2.037644 |
| 60 | 1 | 0 | -0.371771 | -1.210187 | -2.876009 |
| 61 | 1 | 0 | 1.181100  | -1.752241 | -2.230072 |
| 62 | 1 | 0 | -0.274390 | -2.741569 | -1.998227 |
| 63 | 6 | 0 | 0.797375  | -3.001372 | 0.523475  |
| 64 | 1 | 0 | -0.160955 | -3.522311 | 0.579827  |
| 65 | 1 | 0 | 1.337119  | -3.377423 | -0.344130 |
| 66 | 1 | 0 | 1.354470  | -3.288560 | 1.419726  |

Table S8 Coordinates for *(R,S)*-**3(I)** (=DL-6 in SM)

Standard orientation:

| Center<br>Number | Atomic<br>Number | Atomic<br>Type | Coordinates (Angstroms) |           |           |
|------------------|------------------|----------------|-------------------------|-----------|-----------|
|                  |                  |                | X                       | Y         | Z         |
| 1                | 6                | 0              | -4.800775               | 1.063260  | -2.270454 |
| 2                | 6                | 0              | -3.697921               | 0.473110  | -1.657492 |
| 3                | 6                | 0              | -3.832466               | -0.466034 | -0.603052 |
| 4                | 6                | 0              | -5.117364               | -0.823460 | -0.173628 |
| 5                | 6                | 0              | -6.216467               | -0.242363 | -0.784905 |

|    |   |   |           |           |           |
|----|---|---|-----------|-----------|-----------|
| 6  | 6 | 0 | -6.059533 | 0.693145  | -1.821413 |
| 7  | 6 | 0 | -2.501286 | -0.842802 | -0.213383 |
| 8  | 6 | 0 | -1.632685 | -0.143195 | -1.004029 |
| 9  | 7 | 0 | -2.348136 | 0.634983  | -1.898790 |
| 10 | 1 | 0 | -1.952108 | 1.315283  | -2.524113 |
| 11 | 6 | 0 | -2.050843 | -1.831479 | 0.815207  |
| 12 | 6 | 0 | -0.561183 | -2.203564 | 0.570033  |
| 13 | 6 | 0 | -0.075542 | -2.963164 | 1.793707  |
| 14 | 8 | 0 | -0.482173 | -4.246376 | 1.721736  |
| 15 | 6 | 0 | -0.189826 | -5.062241 | 2.871299  |
| 16 | 7 | 0 | 0.188886  | -0.990749 | 0.284556  |
| 17 | 6 | 0 | -0.137018 | -0.309213 | -0.985356 |
| 18 | 6 | 0 | 0.691631  | 1.013655  | -0.813188 |
| 19 | 1 | 0 | -2.151654 | -1.414125 | 1.823761  |
| 20 | 1 | 0 | -2.657011 | -2.740505 | 0.778027  |
| 21 | 1 | 0 | -0.521601 | -2.915255 | -0.264295 |
| 22 | 1 | 0 | -0.604489 | -6.040742 | 2.644295  |
| 23 | 1 | 0 | 0.886577  | -5.128202 | 3.026570  |
| 24 | 1 | 0 | -0.655451 | -4.643488 | 3.762987  |
| 25 | 6 | 0 | 1.594490  | -0.835790 | 0.587055  |
| 26 | 6 | 0 | 1.997382  | 0.535828  | -0.058995 |
| 27 | 6 | 0 | 2.224999  | 1.645718  | 0.978455  |
| 28 | 6 | 0 | 0.817579  | 2.048624  | 1.391590  |
| 29 | 6 | 0 | 0.719419  | 3.479051  | 1.908138  |
| 30 | 7 | 0 | 0.036772  | 1.938618  | 0.146474  |
| 31 | 1 | 0 | -0.914703 | 1.654142  | 0.344342  |
| 32 | 8 | 0 | 1.545716  | 4.344641  | 1.764097  |
| 33 | 8 | 0 | -0.453741 | 3.667558  | 2.545160  |
| 34 | 6 | 0 | -0.704803 | 5.005076  | 3.011687  |
| 35 | 1 | 0 | -0.707701 | 5.703217  | 2.174982  |
| 36 | 1 | 0 | -1.682519 | 4.969842  | 3.485345  |
| 37 | 1 | 0 | 0.059127  | 5.307048  | 3.727689  |
| 38 | 1 | 0 | 2.729939  | 2.498422  | 0.522090  |
| 39 | 1 | 0 | 2.835360  | 1.311526  | 1.817984  |
| 40 | 1 | 0 | 0.433910  | 1.380816  | 2.171780  |
| 41 | 7 | 0 | 2.509619  | -1.846101 | -0.006165 |
| 42 | 6 | 0 | 3.232643  | 0.182717  | -0.857937 |
| 43 | 6 | 0 | 4.107750  | 0.996637  | -1.562906 |
| 44 | 6 | 0 | 3.500403  | -1.185958 | -0.741436 |
| 45 | 6 | 0 | 5.237480  | 0.440528  | -2.164624 |
| 46 | 1 | 0 | 3.931746  | 2.063122  | -1.637714 |
| 47 | 6 | 0 | 4.623713  | -1.753243 | -1.337206 |
| 48 | 6 | 0 | 5.488542  | -0.924487 | -2.047444 |
| 49 | 1 | 0 | 5.923453  | 1.072826  | -2.714398 |

|    |   |   |           |           |           |
|----|---|---|-----------|-----------|-----------|
| 50 | 1 | 0 | 4.821668  | -2.815259 | -1.248443 |
| 51 | 1 | 0 | 6.370193  | -1.350234 | -2.512333 |
| 52 | 1 | 0 | 2.844632  | -2.543808 | 0.644486  |
| 53 | 1 | 0 | -4.683406 | 1.782921  | -3.072569 |
| 54 | 1 | 0 | -6.937547 | 1.132322  | -2.279434 |
| 55 | 1 | 0 | -7.214889 | -0.509524 | -0.460103 |
| 56 | 1 | 0 | -5.252335 | -1.540522 | 0.628101  |
| 57 | 8 | 0 | 0.536747  | -2.516674 | 2.732590  |
| 58 | 6 | 0 | 0.278953  | -1.093783 | -2.258427 |
| 59 | 1 | 0 | -0.170050 | -2.087485 | -2.249660 |
| 60 | 1 | 0 | -0.081880 | -0.588273 | -3.155479 |
| 61 | 1 | 0 | 1.358043  | -1.206892 | -2.338146 |
| 62 | 6 | 0 | 0.954285  | 1.776388  | -2.113207 |
| 63 | 1 | 0 | 1.547227  | 2.665727  | -1.897952 |
| 64 | 1 | 0 | 1.476735  | 1.183827  | -2.862802 |
| 65 | 1 | 0 | 0.015551  | 2.136509  | -2.541464 |
| 66 | 1 | 0 | 1.721445  | -0.841444 | 1.666752  |

Table S9 Coordinates for (*S,S*)-4(*l*) (=LL-8 in SM)

Standard orientation:

| Center<br>Number | Atomic<br>Number | Atomic<br>Type | Coordinates (Angstroms) |           |           |
|------------------|------------------|----------------|-------------------------|-----------|-----------|
|                  |                  |                | X                       | Y         | Z         |
| 1                | 6                | 0              | -4.759885               | 1.975253  | -1.862045 |
| 2                | 6                | 0              | -3.752693               | 1.138659  | -1.380132 |
| 3                | 6                | 0              | -4.023965               | 0.057224  | -0.499006 |
| 4                | 6                | 0              | -5.349341               | -0.177736 | -0.101966 |
| 5                | 6                | 0              | -6.355001               | 0.650533  | -0.582446 |
| 6                | 6                | 0              | -6.063405               | 1.715697  | -1.454668 |
| 7                | 6                | 0              | -2.761035               | -0.571448 | -0.221538 |
| 8                | 6                | 0              | -1.797420               | 0.113461  | -0.903421 |
| 9                | 7                | 0              | -2.387557               | 1.155411  | -1.605132 |
| 10               | 1                | 0              | -1.924353               | 1.753277  | -2.267314 |
| 11               | 6                | 0              | -2.416840               | -1.757742 | 0.612851  |
| 12               | 6                | 0              | -0.956509               | -1.619334 | 1.092741  |
| 13               | 6                | 0              | -0.569681               | -2.925486 | 1.788040  |
| 14               | 8                | 0              | -1.162162               | -2.997929 | 2.997720  |
| 15               | 6                | 0              | -0.935468               | -4.205534 | 3.745849  |
| 16               | 7                | 0              | -0.024883               | -1.335033 | 0.001633  |
| 17               | 6                | 0              | -0.348615               | -0.273903 | -1.003046 |
| 18               | 6                | 0              | 0.656374                | 0.887907  | -0.653008 |
| 19               | 1                | 0              | -3.060894               | -1.833524 | 1.492574  |

|    |   |   |           |           |           |
|----|---|---|-----------|-----------|-----------|
| 20 | 1 | 0 | -2.535018 | -2.691710 | 0.047613  |
| 21 | 1 | 0 | -0.940922 | -0.825742 | 1.854837  |
| 22 | 1 | 0 | -1.480966 | -4.075905 | 4.677598  |
| 23 | 1 | 0 | -1.311845 | -5.070573 | 3.198983  |
| 24 | 1 | 0 | 0.128975  | -4.339457 | 3.940390  |
| 25 | 6 | 0 | 1.362592  | -1.174917 | 0.456160  |
| 26 | 6 | 0 | 1.940567  | 0.138675  | -0.172343 |
| 27 | 6 | 0 | 2.549223  | 1.097956  | 0.866320  |
| 28 | 6 | 0 | 1.321296  | 1.778984  | 1.517308  |
| 29 | 6 | 0 | 1.554913  | 3.260000  | 1.781103  |
| 30 | 7 | 0 | 0.210335  | 1.532853  | 0.601298  |
| 31 | 1 | 0 | -0.336358 | 2.369895  | 0.437543  |
| 32 | 8 | 0 | 1.014921  | 4.167264  | 1.193384  |
| 33 | 8 | 0 | 2.449348  | 3.437032  | 2.770917  |
| 34 | 6 | 0 | 2.762339  | 4.800373  | 3.112343  |
| 35 | 1 | 0 | 3.186426  | 5.320954  | 2.253294  |
| 36 | 1 | 0 | 1.865740  | 5.324479  | 3.444003  |
| 37 | 1 | 0 | 3.489405  | 4.737731  | 3.918307  |
| 38 | 1 | 0 | 3.179831  | 1.831303  | 0.356082  |
| 39 | 1 | 0 | 3.181718  | 0.584697  | 1.591827  |
| 40 | 1 | 0 | 1.119945  | 1.321843  | 2.494709  |
| 41 | 7 | 0 | 2.277416  | -2.230041 | 0.015490  |
| 42 | 6 | 0 | 2.953717  | -0.379961 | -1.176002 |
| 43 | 6 | 0 | 3.754760  | 0.287218  | -2.093066 |
| 44 | 6 | 0 | 3.069752  | -1.773663 | -1.025373 |
| 45 | 6 | 0 | 4.638382  | -0.439678 | -2.899579 |
| 46 | 1 | 0 | 3.700541  | 1.365785  | -2.199414 |
| 47 | 6 | 0 | 3.941067  | -2.509761 | -1.831184 |
| 48 | 6 | 0 | 4.715735  | -1.827212 | -2.769692 |
| 49 | 1 | 0 | 5.260278  | 0.075330  | -3.623797 |
| 50 | 1 | 0 | 4.024393  | -3.586277 | -1.720362 |
| 51 | 1 | 0 | 5.398367  | -2.387832 | -3.401042 |
| 52 | 1 | 0 | 1.883970  | -3.161117 | 0.000505  |
| 53 | 1 | 0 | 1.372815  | -1.136354 | 1.550795  |
| 54 | 1 | 0 | -4.539322 | 2.800378  | -2.532759 |
| 55 | 1 | 0 | -6.869341 | 2.346481  | -1.815435 |
| 56 | 1 | 0 | -7.383497 | 0.476386  | -0.282959 |
| 57 | 1 | 0 | -5.588461 | -0.996724 | 0.569785  |
| 58 | 8 | 0 | 0.135615  | -3.800793 | 1.346039  |
| 59 | 6 | 0 | -0.120262 | -0.854336 | -2.422135 |
| 60 | 1 | 0 | 0.920531  | -1.132905 | -2.586448 |
| 61 | 1 | 0 | -0.736008 | -1.747193 | -2.537731 |
| 62 | 1 | 0 | -0.407769 | -0.144973 | -3.203039 |
| 63 | 6 | 0 | 0.902269  | 1.910938  | -1.768946 |

|    |   |   |          |          |           |
|----|---|---|----------|----------|-----------|
| 64 | 1 | 0 | 1.205905 | 1.448546 | -2.708163 |
| 65 | 1 | 0 | 0.009426 | 2.515370 | -1.954493 |
| 66 | 1 | 0 | 1.680322 | 2.617920 | -1.472118 |

Table S10 Coordinates for (S,S)-4(2) (=LL-9 in SM)

Standard orientation:

| Center<br>Number | Atomic<br>Number | Atomic<br>Type | Coordinates (Angstroms) |           |           |
|------------------|------------------|----------------|-------------------------|-----------|-----------|
|                  |                  |                | X                       | Y         | Z         |
| 1                | 6                | 0              | 4.794757                | 1.399981  | -2.160199 |
| 2                | 6                | 0              | 3.725921                | 0.711207  | -1.593614 |
| 3                | 6                | 0              | 3.901962                | -0.212760 | -0.533490 |
| 4                | 6                | 0              | 5.194706                | -0.460836 | -0.056047 |
| 5                | 6                | 0              | 6.262021                | 0.218510  | -0.622462 |
| 6                | 6                | 0              | 6.063471                | 1.142853  | -1.660782 |
| 7                | 6                | 0              | 2.591746                | -0.695432 | -0.187823 |
| 8                | 6                | 0              | 1.700015                | -0.070191 | -1.010497 |
| 9                | 7                | 0              | 2.377057                | 0.747641  | -1.901635 |
| 10               | 1                | 0              | 1.943238                | 1.515546  | -2.386676 |
| 11               | 6                | 0              | 2.187834                | -1.692521 | 0.851006  |
| 12               | 6                | 0              | 0.727204                | -2.158043 | 0.597244  |
| 13               | 6                | 0              | 0.267685                | -2.920391 | 1.829500  |
| 14               | 8                | 0              | 0.809655                | -4.155565 | 1.820700  |
| 15               | 6                | 0              | 0.552443                | -4.961136 | 2.985432  |
| 16               | 7                | 0              | -0.092548               | -1.001657 | 0.260774  |
| 17               | 6                | 0              | 0.220596                | -0.353059 | -1.033658 |
| 18               | 6                | 0              | -0.704386               | 0.906513  | -0.961138 |
| 19               | 1                | 0              | 2.845374                | -2.565636 | 0.841570  |
| 20               | 1                | 0              | 2.251821                | -1.247554 | 1.850898  |
| 21               | 1                | 0              | 0.743373                | -2.891654 | -0.218605 |
| 22               | 1                | 0              | 1.086929                | -5.892212 | 2.816756  |
| 23               | 1                | 0              | 0.920148                | -4.462180 | 3.881518  |
| 24               | 1                | 0              | -0.516160               | -5.146064 | 3.091354  |
| 25               | 6                | 0              | -1.510689               | -0.936643 | 0.520671  |
| 26               | 6                | 0              | -1.975750               | 0.413789  | -0.121209 |
| 27               | 6                | 0              | -2.202887               | 1.546784  | 0.917448  |
| 28               | 6                | 0              | -1.140589               | 2.631487  | 0.582272  |
| 29               | 6                | 0              | -0.612464               | 3.299952  | 1.833072  |
| 30               | 7                | 0              | -0.070080               | 1.951875  | -0.136063 |
| 31               | 1                | 0              | 0.543458                | 1.522845  | 0.554665  |
| 32               | 8                | 0              | 0.362873                | 2.944437  | 2.445448  |
| 33               | 8                | 0              | -1.402461               | 4.324165  | 2.208020  |

|    |   |   |           |           |           |
|----|---|---|-----------|-----------|-----------|
| 34 | 6 | 0 | -1.028859 | 4.982920  | 3.433253  |
| 35 | 1 | 0 | -0.033450 | 5.415899  | 3.340845  |
| 36 | 1 | 0 | -1.773643 | 5.759979  | 3.583590  |
| 37 | 1 | 0 | -1.036839 | 4.275705  | 4.262147  |
| 38 | 1 | 0 | -2.040998 | 1.164003  | 1.926699  |
| 39 | 1 | 0 | -3.217377 | 1.942445  | 0.877401  |
| 40 | 1 | 0 | -1.587018 | 3.403475  | -0.048321 |
| 41 | 7 | 0 | -2.350530 | -1.992309 | -0.111943 |
| 42 | 6 | 0 | -3.221710 | 0.008812  | -0.878327 |
| 43 | 6 | 0 | -4.164337 | 0.785840  | -1.536536 |
| 44 | 6 | 0 | -3.400895 | -1.377117 | -0.798311 |
| 45 | 6 | 0 | -5.275288 | 0.180080  | -2.124370 |
| 46 | 1 | 0 | -4.053727 | 1.863245  | -1.587477 |
| 47 | 6 | 0 | -4.505995 | -1.994495 | -1.380003 |
| 48 | 6 | 0 | -5.439422 | -1.201000 | -2.041463 |
| 49 | 1 | 0 | -6.013170 | 0.784182  | -2.637467 |
| 50 | 1 | 0 | -4.637856 | -3.068563 | -1.316728 |
| 51 | 1 | 0 | -6.306816 | -1.666804 | -2.494560 |
| 52 | 1 | 0 | -2.619462 | -2.743176 | 0.509959  |
| 53 | 1 | 0 | -1.670301 | -0.963354 | 1.594683  |
| 54 | 1 | 0 | 4.645222  | 2.109450  | -2.966078 |
| 55 | 1 | 0 | 6.916044  | 1.662518  | -2.081269 |
| 56 | 1 | 0 | 7.266580  | 0.038784  | -0.258522 |
| 57 | 1 | 0 | 5.360941  | -1.166442 | 0.749995  |
| 58 | 8 | 0 | -0.433139 | -2.515785 | 2.724029  |
| 59 | 6 | 0 | -0.090394 | -1.226141 | -2.278273 |
| 60 | 1 | 0 | 0.443139  | -2.174594 | -2.214039 |
| 61 | 1 | 0 | -1.152836 | -1.439139 | -2.376668 |
| 62 | 1 | 0 | 0.253398  | -0.728194 | -3.185738 |
| 63 | 6 | 0 | -1.060044 | 1.516070  | -2.319102 |
| 64 | 1 | 0 | -1.632826 | 0.838591  | -2.948396 |
| 65 | 1 | 0 | -1.652924 | 2.422057  | -2.183742 |
| 66 | 1 | 0 | -0.156906 | 1.809782  | -2.856862 |

---

**Item 7. Computations of both the OR and ECD spectra for four enantiomers at the B3LYP/6-311++G(2d,p) level in the gas phase and their comparison with experimental results**

Table S11 The experimental and predicted OR values for the four compounds

|                                                                                                                                                                                                                               |                                                                                                                                                                                                                          |
|-------------------------------------------------------------------------------------------------------------------------------------------------------------------------------------------------------------------------------|--------------------------------------------------------------------------------------------------------------------------------------------------------------------------------------------------------------------------|
| 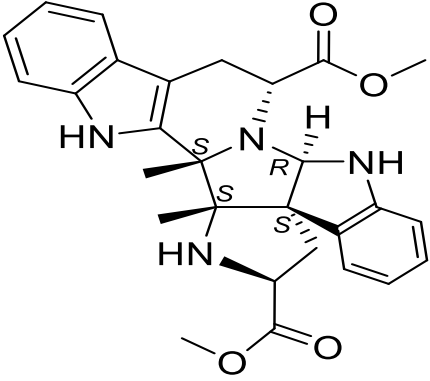                                                                                                                                             |                                                                                                                                        |
| <p>(<i>R,S</i>)-3(1) (OR) (numbered as DL-6 in item 4 part)<br/>           Calcd OR (<math>[\alpha]_D</math>): 142.7<br/>           Exp. <math>[\alpha]_D</math>: +32 (<i>c</i> 3.25, CH<sub>2</sub>Cl<sub>2</sub>)</p>       | <p>(<i>R,S</i>)-3(2) (OR) (numbered as DL-9 in item 4 part)<br/>           Calcd OR (<math>[\alpha]_D</math>): -156.3<br/>           Exp. <math>[\alpha]_D</math>: +32 (<i>c</i> 3.25, CH<sub>2</sub>Cl<sub>2</sub>)</p> |
|                                                                                                                                            |                                                                                                                                      |
| <p>(<i>S,S</i>)-4(1) (LL-8 in text section 4)<br/>           Calcd OR (<math>[\alpha]_D</math>) for current structure: 100.5<br/>           Exp. OR (<math>[\alpha]_D</math>): -104.76 (<i>c</i>, 5.25, CHCl<sub>3</sub>)</p> | <p>(<i>S,S</i>)-4(2) (LL-9 in section 4)<br/>           Calcd OR (<math>[\alpha]_D</math>): -225.2<br/>           Exp. OR (<math>[\alpha]_D</math>): -104.76 (<i>c</i>, 5.25, CHCl<sub>3</sub>)</p>                      |

The ECD spectra are listed below:

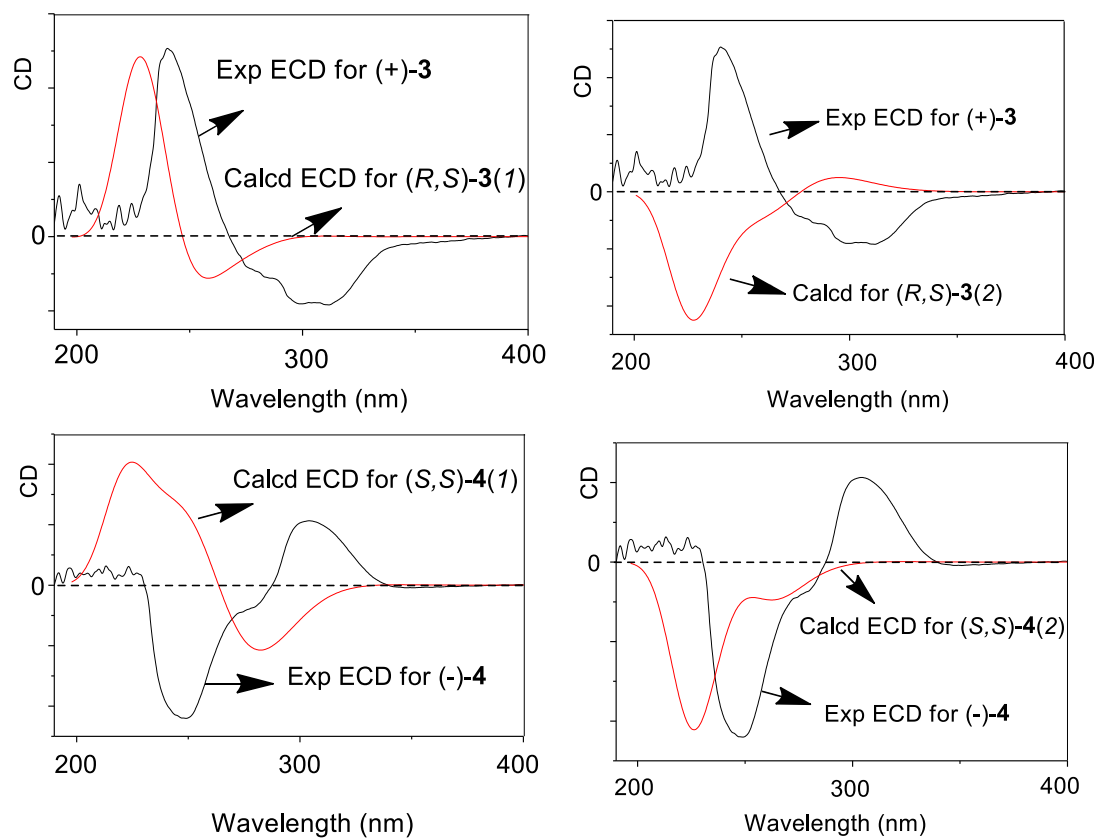

Fig. S8 The experimental and computed ECD for the two compounds **3** and **4**.

**Conclusion:**

- (1) The ECD curve of (+)-**3** matched either (*R,S*)-**3**(2)'s enantiomer (namely (*S,R*)-**3**(2)) or (*R,S*)-**3**(1). However, the energy of **3**(2) is lower than **3**(1) by near 0.8 – 1.2 kcal/mol (Table S6). By the way, the isolated yield of **3** was about 18%. This yield is close the theoretical yield (21-30%). In this case, (*S,R*)-**3**(2) is preferred.
- (2) The ECD curve of (-)-**4** looked like its enantiomers ECD of (*S,S*)-**4**(1).

Based on the OR and ECD and the geometries with lowest energy among the diastereoisomers (Table S6), the (+)-**3** was assigned as (*S,R*)-**3**(2), and (-)-**4** was assigned as (*R,R*)-**4**(1).

## Item 8. Analysis of %ee values of L-TME via HPLC

### A: Computation of the yields to recovered 1 and 2.

The recovered yield may be named as below using the following reaction formula:

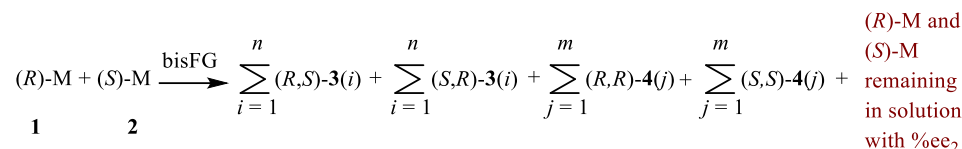

In this reaction, the quantity of **1** has been assumed larger quantity than **2**. For easy understanding the calculation procedure, an ideal example is listed here. Materials **1** (120 mg, 0.55 mmole) and **2** (98 mg, 0.45 mmol) in CH<sub>2</sub>Cl<sub>2</sub> solution, the bisFG, biacetyl (35 mg, 0.405 mmole, 90% of mole of **2**) (since 1 mole of bisFG can react with 2 moles of **1** and **2** theoretically) was added into the solution at near 0 °C. The 0.405 mole of bisFG theoretically consumed 0.81 mole of sum of **1** and **2**. Then, only total of 0.19 mmole of **1** and **2** (41.4 mg) will be left theoretically. Finally, silica column chromatography was used to isolate the unreacted **1** and **2**. The weight the recovered material was 23.3 mg, it's recovered yield was 56%.

In the series of the reactions, biacetyl was 90% of the mole of **2** used.

The smaller the %ee<sub>1</sub> used in the reaction, the more the recovered material will be. In real cases, when the %ee<sub>1</sub> was about 5%, then, the material used in the reactions were 700-800 mg. When the %ee<sub>1</sub> was about 90%, the material used in the reactions were 200 to 300 mg. The specific yields are summarized in the Table S12 in the next section.

### B. %ee<sub>2</sub> analysis using HPLC.

All the data from the Tables S10 to S12 are finally summarized at the end of this section for clear reading.

The content of L-tryptophan methyl ester and D- tryptophan methyl ester (%ee) was analyzed by HPLC using Chiralcel-IB column, employing a mixture of petroleum ether, dichloromethane and isopropanol (v/v/v: 60:10:30).

There are three series of Pictet-Spengler reactions.

The %ee values of L-TME recovered from the first condensation series are listed below.

“Before the reaction” refers to the HPLC and %ee<sub>1</sub> of L-TME prepared as the starting material. “After the reaction” means the HPLC and the corresponding %ee<sub>2</sub> of the L-TME that was recovered from the Pictet-Spengler reaction in HPLC analysis.

**Table S12** HPLC analysis for the *first series of condensations*. Accurate determination of %ee values is very critical in HPLC analysis. The integration intervals (from starting retention time to its ending time) are fixed in all integration squares.

| Before the reaction <sup>a</sup>                                                    | After the reaction <sup>a</sup>                                                      |
|-------------------------------------------------------------------------------------|--------------------------------------------------------------------------------------|
| 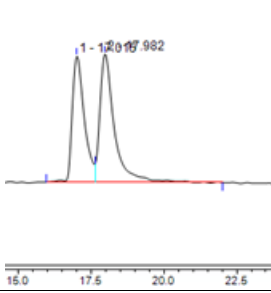 |  |
| 10.3% of L-TME initially used                                                       | 11.8% of L-TME recovered                                                             |

HPLC area percentage for the left plot.

| Signal | Retention time | sample | area%  | area     | height | type | half peak wide | -    | -    | -   |
|--------|----------------|--------|--------|----------|--------|------|----------------|------|------|-----|
| 峰 峰名称  | 保留时间           | 样品量    | 相对峰面积  | 峰面积      | 峰高     | 类型   | 峰宽 (50%)       | 不对称度 | 分离度  | 塔板数 |
| 序号     | min            | n.a.   | %      | mAU*min  | mAU    |      | min            | EP   | EP   | EP  |
| 1      | 17.015         | n.a.   | 44.85  | 122.8869 | 255.42 | BM*  | 0.433          | n.a. | 1.27 | 856 |
| 2      | 17.982         | n.a.   | 55.15  | 151.0868 | 260.41 | MB*  | 0.465          | n.a. | n.a. | 829 |
| 最大值    |                | 0.0000 | 55.15  | 151.0868 | 260.41 |      | 0.465          | 0.00 | 1.27 | 856 |
| 最小值    |                | 0.0000 | 44.85  | 122.8869 | 255.42 |      | 0.433          | 0.00 | 1.27 | 829 |
| 总和     |                | 0.0000 | 100.00 | 273.9737 | 515.83 |      |                |      |      |     |

HPLC area percentage for the left plot.

| Signal | Retention time | sample | area%  | area     | height | type | half peak wide | -    | -    | -   |
|--------|----------------|--------|--------|----------|--------|------|----------------|------|------|-----|
| 峰 峰名称  | 保留时间           | 样品量    | 相对峰面积  | 峰面积      | 峰高     | 类型   | 峰宽 (50%)       | 不对称度 | 分离度  | 塔板数 |
| 序号     | min            | n.a.   | %      | mAU*min  | mAU    |      | min            | EP   | EP   | EP  |
| 1      | 16.992         | n.a.   | 44.09  | 251.4693 | 457.51 | BM*  | 0.535          | n.a. | 1.02 | 558 |
| 2      | 17.948         | n.a.   | 55.91  | 318.8901 | 472.82 | MB*  | 0.576          | n.a. | n.a. | 538 |
| 最大值    |                | 0.0000 | 55.91  | 318.8901 | 472.82 |      | 0.576          | 0.00 | 1.02 | 558 |
| 最小值    |                | 0.0000 | 44.09  | 251.4693 | 457.51 |      | 0.535          | 0.00 | 1.02 | 538 |
| 总和     |                | 0.0000 | 100.00 | 570.3594 | 930.33 |      |                |      |      |     |

The others have the same arrangement below:

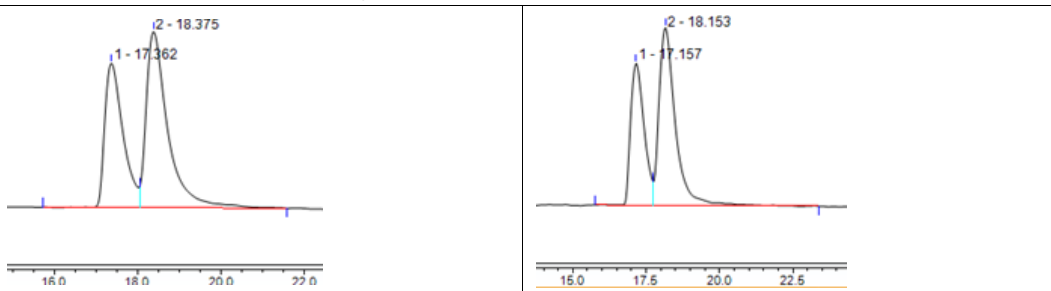

18.7% of L-TME initially used

20.9% of L-TME recovered

| Signal | Retention time | sample | area%  | area     | height | type | half peak wide | -    | -    | -   |
|--------|----------------|--------|--------|----------|--------|------|----------------|------|------|-----|
| 峰 峰名称  | 保留时间           | 样品量    | 相对峰面积  | 峰面积      | 峰高     | 类型   | 峰宽 (50%)       | 不对称度 | 分离度  | 塔板数 |
| 序号     | min            | n.a.   | %      | mAU*min  | mAU    |      | min            | EP   | EP   | EP  |
| 1      | 17.362         | n.a.   | 40.66  | 102.1802 | 202.47 | BM*  | 0.465          | n.a. | 1.24 | 772 |
| 2      | 18.375         | n.a.   | 59.34  | 149.1388 | 247.08 | MB*  | 0.498          | n.a. | n.a. | 754 |
| 最大值    |                | 0.0000 | 59.34  | 149.1388 | 247.08 |      | 0.498          | 0.00 | 1.24 | 772 |
| 最小值    |                | 0.0000 | 40.66  | 102.1802 | 202.47 |      | 0.465          | 0.00 | 1.24 | 754 |
| 总和     |                | 0.0000 | 100.00 | 251.3191 | 449.55 |      |                |      |      |     |

| 峰 峰名称 | 保留时间   | 样品量    | 相对峰面积  | 峰面积      | 峰高      | 类型  | 峰宽 (50%) | 不对称度 | 分离度  | 塔板数 |
|-------|--------|--------|--------|----------|---------|-----|----------|------|------|-----|
| 序号    | min    | n.a.   | %      | mAU*min  | mAU     |     | min      | EP   | EP   | EP  |
| 1     | 17.157 | n.a.   | 39.54  | 271.7299 | 510.57  | BM* | 0.513    | n.a. | 1.10 |     |
| 2     | 18.153 | n.a.   | 60.46  | 415.5243 | 639.67  | MB* | 0.556    | n.a. | n.a. |     |
| 最大值   |        | 0.0000 | 60.46  | 415.5243 | 639.67  |     | 0.556    | 0.00 | 1.10 |     |
| 最小值   |        | 0.0000 | 39.54  | 271.7299 | 510.57  |     | 0.513    | 0.00 | 1.10 |     |
| 总和    |        | 0.0000 | 100.00 | 687.2542 | 1150.24 |     |          |      |      |     |

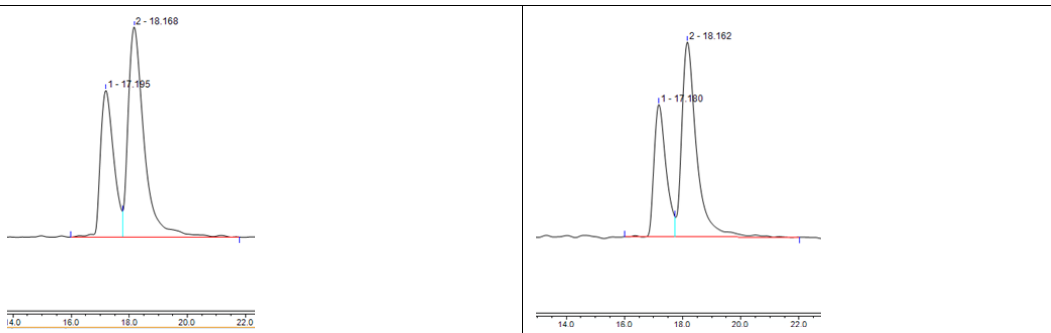

27.1% of L-TME initially used

29.4% of L-TME recovered

| Signal | Retention time | sample | area% | area | height | type | half peak wide | - | - | - |
|--------|----------------|--------|-------|------|--------|------|----------------|---|---|---|
| -      |                |        |       |      |        |      |                |   |   |   |

Table S12 continued

| 峰序号 | 峰名称 | 保留时间 min | 样品量 n.a. | 相对峰面积 % | 峰面积 mAU*min | 峰高 mAU | 类型  | 峰宽 (50%) min | 不对称度 EP | 分离度 EP | 塔板数 EP |
|-----|-----|----------|----------|---------|-------------|--------|-----|--------------|---------|--------|--------|
| 1   |     | 17.195   | n.a.     | 36.47   | 206.4828    | 391.03 | BM* | 0.501        | n.a.    | 1.10   | 653    |
| 2   |     | 18.168   | n.a.     | 63.53   | 359.7481    | 559.86 | MB* | 0.547        | n.a.    | n.a.   | 610    |
| 最大值 |     |          | 0.0000   | 63.53   | 359.7481    | 559.86 |     | 0.547        | 0.00    | 1.10   | 653    |
| 最小值 |     |          | 0.0000   | 36.47   | 206.4828    | 391.03 |     | 0.501        | 0.00    | 1.10   | 610    |
| 总和  |     |          | 0.0000   | 100.00  | 566.2309    | 950.89 |     |              |         |        |        |

| 峰序号 | 峰名称 | 保留时间 min | 样品量 n.a. | 相对峰面积 % | 峰面积 mAU*min | 峰高 mAU | 类型  | 峰宽 (50%) min | 不对称度 EP | 分离度 EP | 塔板数 EP |
|-----|-----|----------|----------|---------|-------------|--------|-----|--------------|---------|--------|--------|
| 1   |     | 17.180   | n.a.     | 35.32   | 127.2259    | 266.32 | BM* | 0.445        | n.a.    | 1.23   | 8259   |
| 2   |     | 18.162   | n.a.     | 64.68   | 233.0023    | 392.03 | MB* | 0.493        | n.a.    | n.a.   | 7507   |
| 最大值 |     |          | 0.0000   | 64.68   | 233.0023    | 392.03 |     | 0.493        | 0.00    | 1.23   | 8259   |
| 最小值 |     |          | 0.0000   | 35.32   | 127.2259    | 266.32 |     | 0.445        | 0.00    | 1.23   | 7507   |
| 总和  |     |          | 0.0000   | 100.00  | 360.2282    | 658.35 |     |              |         |        |        |

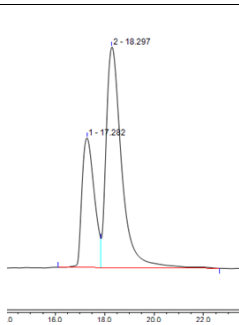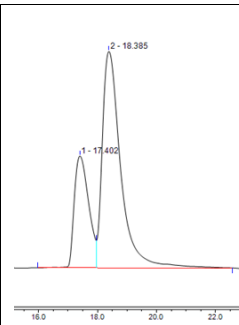

36.6% of L-TME initially used

42.2% of L-TME recovered

| 峰序号 | 峰名称 | 保留时间 min | 样品量 n.a. | 相对峰面积 % | 峰面积 mAU*min | 峰高 mAU  | 类型  | 峰宽 (50%) min | 不对称度 EP | 分离度 EP | 塔板数 EP |
|-----|-----|----------|----------|---------|-------------|---------|-----|--------------|---------|--------|--------|
| 1   |     | 17.282   | n.a.     | 31.69   | 359.4257    | 623.98  | BM* | 0.566        | n.a.    | 1.00   | 516    |
| 2   |     | 18.297   | n.a.     | 68.31   | 774.8411    | 1062.51 | MB* | 0.628        | n.a.    | n.a.   | 470    |
| 最大值 |     |          | 0.0000   | 68.31   | 774.8411    | 1062.51 |     | 0.628        | 0.00    | 1.00   | 516    |
| 最小值 |     |          | 0.0000   | 31.69   | 359.4257    | 623.98  |     | 0.566        | 0.00    | 1.00   | 470    |
| 总和  |     |          | 0.0000   | 100.00  | 1134.2668   | 1686.48 |     |              |         |        |        |

| 峰序号 | 峰名称 | 保留时间 min | 样品量 n.a. | 相对峰面积 % | 峰面积 mAU*min | 峰高 mAU | 类型  | 峰宽 (50%) min | 不对称度 EP | 分离度 EP | 塔板数 EP |
|-----|-----|----------|----------|---------|-------------|--------|-----|--------------|---------|--------|--------|
| 1   |     | 17.402   | n.a.     | 28.88   | 174.0920    | 306.44 | BM* | 0.557        | n.a.    | 0.99   | 5403   |
| 2   |     | 18.385   | n.a.     | 71.12   | 428.7598    | 593.03 | MB* | 0.617        | n.a.    | n.a.   | 4925   |
| 最大值 |     |          | 0.0000   | 71.12   | 428.7598    | 593.03 |     | 0.617        | 0.00    | 0.99   | 5403   |
| 最小值 |     |          | 0.0000   | 28.88   | 174.0920    | 306.44 |     | 0.557        | 0.00    | 0.99   | 4925   |
| 总和  |     |          | 0.0000   | 100.00  | 602.8519    | 899.47 |     |              |         |        |        |

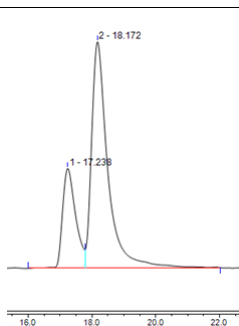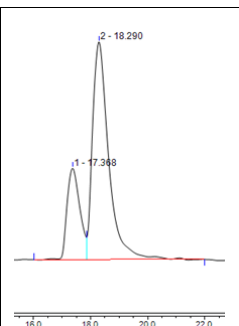

47.7% of L-TME initially used

50.2% of L-TME recovered

| 峰序号 | 峰名称 | 保留时间 min | 样品量 n.a. | 相对峰面积 % | 峰面积 mAU*min | 峰高 mAU | 类型  | 峰宽 (50%) min | 不对称度 EP | 分离度 EP | 塔板数 EP |
|-----|-----|----------|----------|---------|-------------|--------|-----|--------------|---------|--------|--------|
| 1   |     | 17.238   | n.a.     | 26.16   | 111.1851    | 234.07 | BM* | 0.440        | n.a.    | 1.19   | 849    |
| 2   |     | 18.172   | n.a.     | 73.84   | 313.9112    | 531.06 | MB* | 0.485        | n.a.    | n.a.   | 777    |
| 最大值 |     |          | 0.0000   | 73.84   | 313.9112    | 531.06 |     | 0.485        | 0.00    | 1.19   | 849    |
| 最小值 |     |          | 0.0000   | 26.16   | 111.1851    | 234.07 |     | 0.440        | 0.00    | 1.19   | 777    |
| 总和  |     |          | 0.0000   | 100.00  | 425.0973    | 765.13 |     |              |         |        |        |

| 峰序号 | 峰名称 | 保留时间 min | 样品量 n.a. | 相对峰面积 % | 峰面积 mAU*min | 峰高 mAU | 类型  | 峰宽 (50%) min | 不对称度 EP | 分离度 EP | 塔板数 EP |
|-----|-----|----------|----------|---------|-------------|--------|-----|--------------|---------|--------|--------|
| 1   |     | 18.0     | n.a.     | 24.91   | 95.2677     | 183.72 | BM* | 0.509        | n.a.    | 1.00   | 645    |
| 2   |     | 18.0     | n.a.     | 75.09   | 287.1179    | 437.84 | MB* | 0.574        | n.a.    | n.a.   | 562    |
| 最大值 |     |          | 0.0000   | 75.09   | 287.1179    | 437.84 |     | 0.574        | 0.00    | 1.00   | 645    |
| 最小值 |     |          | 0.0000   | 24.91   | 95.2677     | 183.72 |     | 0.509        | 0.00    | 1.00   | 562    |
| 总和  |     |          | 0.0000   | 100.00  | 382.3856    | 621.56 |     |              |         |        |        |

Table S12 continued

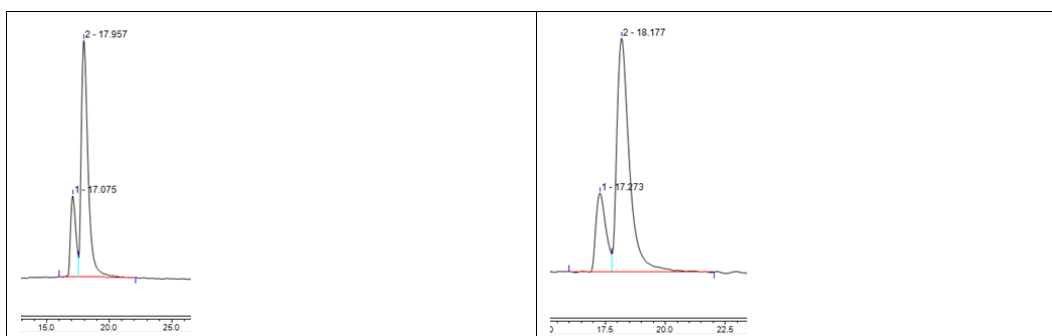

57.8% of L-TME initially used

58.4% of L-TME recovered

| Signal | Retention time | sample | area%  | area      | height  | type | half peak wide | -    | -    | -   |
|--------|----------------|--------|--------|-----------|---------|------|----------------|------|------|-----|
| 峰 峰名称  | 保留时间           | 样品量    | 相对峰面积  | 峰面积       | 峰高      | 类型   | 峰宽 (50%)       | 不对称度 | 分离度  | 塔板数 |
| 序号     | min            | n.a.   | %      | mAU*min   | mAU     |      | min            | EP   | EP   | EP  |
| 1      | 17.075         | n.a.   | 21.08  | 212.9558  | 433.72  | BM*  | 0.483          | n.a. | 1.00 | 691 |
| 2      | 17.957         | n.a.   | 78.92  | 797.3170  | 1268.20 | MB*  | 0.553          | n.a. | n.a. | 584 |
| 最大值    |                | 0.0000 | 78.92  | 797.3170  | 1268.20 |      | 0.553          | 0.00 | 1.00 | 691 |
| 最小值    |                | 0.0000 | 21.08  | 212.9558  | 433.72  |      | 0.483          | 0.00 | 1.00 | 584 |
| 总和     |                | 0.0000 | 100.00 | 1010.2728 | 1701.92 |      |                |      |      |     |

  

| 峰 峰名称 | 保留时间   | 样品量    | 相对峰面积  | 峰面积      | 峰高     | 类型  | 峰宽 (50%) | 不对称度 | 分离度  | 塔板数 |
|-------|--------|--------|--------|----------|--------|-----|----------|------|------|-----|
| 序号    | min    | n.a.   | %      | mAU*min  | mAU    |     | min      | EP   | EP   | EP  |
| 1     | 17.273 | n.a.   | 20.81  | 75.7716  | 158.20 | BM* | 0.467    | n.a. | 1.07 | 75  |
| 2     | 18.177 | n.a.   | 79.19  | 288.3187 | 470.02 | MB* | 0.527    | n.a. | n.a. | 66  |
| 最大值   |        | 0.0000 | 79.19  | 288.3187 | 470.02 |     | 0.527    | 0.00 | 1.07 | 75  |
| 最小值   |        | 0.0000 | 20.81  | 75.7716  | 158.20 |     | 0.467    | 0.00 | 1.07 | 66  |
| 总和    |        | 0.0000 | 100.00 | 364.0903 | 628.22 |     |          |      |      |     |

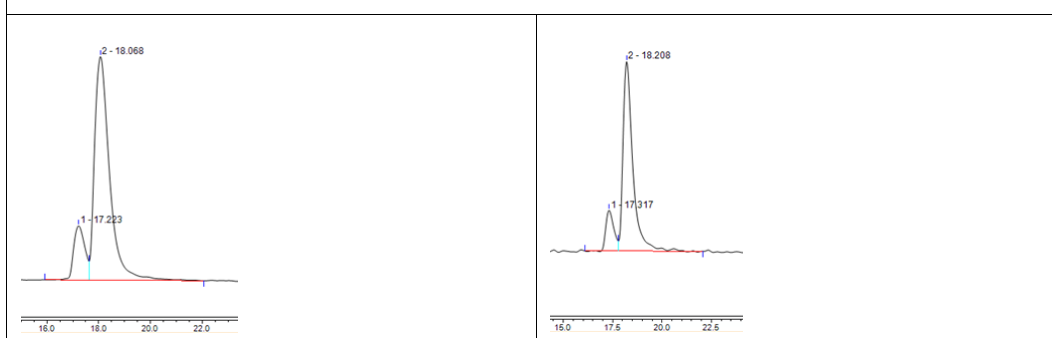

69.4% of L-TME initially used

70.3% of L-TME recovered

| Signal | Retention time | sample | area%  | area     | height  | type | half peak wide | -    | -    | -    |
|--------|----------------|--------|--------|----------|---------|------|----------------|------|------|------|
| 峰 峰名称  | 保留时间           | 样品量    | 相对峰面积  | 峰面积      | 峰高      | 类型   | 峰宽 (50%)       | 不对称度 | 分离度  | 塔板数  |
| 序号     | min            | n.a.   | %      | mAU*min  | mAU     |      | min            | EP   | EP   | EP   |
| 1      | 17.223         | n.a.   | 15.32  | 146.8727 | 291.31  | BM*  | 0.511          | n.a. | 0.90 | 6285 |
| 2      | 18.068         | n.a.   | 84.68  | 811.7688 | 1203.07 | MB*  | 0.593          | n.a. | n.a. | 5137 |
| 最大值    |                | 0.0000 | 84.68  | 811.7688 | 1203.07 |      | 0.593          | 0.00 | 0.90 | 6285 |
| 最小值    |                | 0.0000 | 15.32  | 146.8727 | 291.31  |      | 0.511          | 0.00 | 0.90 | 5137 |
| 总和     |                | 0.0000 | 100.00 | 958.6415 | 1494.38 |      |                |      |      |      |

  

| 峰 峰名称 | 保留时间   | 样品量    | 相对峰面积  | 峰面积      | 峰高     | 类型  | 峰宽 (50%) | 不对称度 | 分离度  | 塔板数  |
|-------|--------|--------|--------|----------|--------|-----|----------|------|------|------|
| 序号    | min    | n.a.   | %      | mAU*min  | mAU    |     | min      | EP   | EP   | EP   |
| 1     | 17.317 | n.a.   | 14.85  | 29.0059  | 61.69  | BM* | 0.455    | n.a. | 1.12 | 8025 |
| 2     | 18.208 | n.a.   | 85.15  | 166.3511 | 286.81 | MB* | 0.487    | n.a. | n.a. | 7755 |
| 最大值   |        | 0.0000 | 85.15  | 166.3511 | 286.81 |     | 0.487    | 0.00 | 1.12 | 8025 |
| 最小值   |        | 0.0000 | 14.85  | 29.0059  | 61.69  |     | 0.455    | 0.00 | 1.12 | 7755 |
| 总和    |        | 0.0000 | 100.00 | 195.3570 | 348.49 |     |          |      |      |      |

|                                                                                                                                                                                                                                                                                    |                |             |            |                |                                                                                     |      |                 |            |           |           |
|------------------------------------------------------------------------------------------------------------------------------------------------------------------------------------------------------------------------------------------------------------------------------------|----------------|-------------|------------|----------------|-------------------------------------------------------------------------------------|------|-----------------|------------|-----------|-----------|
| 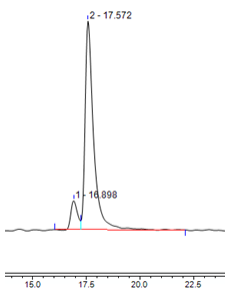                                                                                                                                                                                                  |                |             |            |                |   |      |                 |            |           |           |
| 80.5% of L-TME initially used                                                                                                                                                                                                                                                      |                |             |            |                | 82.1% of L-TME recovered                                                            |      |                 |            |           |           |
| Signal                                                                                                                                                                                                                                                                             | Retention time | sample      | area%      | area           | height                                                                              | type | half peak wide  | -          | -         | -         |
| 峰 峰名称<br>序号                                                                                                                                                                                                                                                                        | 保留时间<br>min    | 样品量<br>n.a. | 相对峰面积<br>% | 峰面积<br>mAU*min | 峰高<br>mAU                                                                           | 类型   | 峰宽 (50%)<br>min | 不对称度<br>EP | 分离度<br>EP | 塔板数<br>EP |
| 1                                                                                                                                                                                                                                                                                  | 16.898         | n.a.        | 9.73       | 24.1430        | 68.12                                                                               | BM*  | 0.347           | n.a.       | 1.10      | 13168     |
| 2                                                                                                                                                                                                                                                                                  | 17.572         | n.a.        | 90.27      | 223.8867       | 490.69                                                                              | MB*  | 0.376           | 1.75       | n.a.      | 12113     |
| 最大值                                                                                                                                                                                                                                                                                |                | 0.0000      | 90.27      | 223.8867       | 490.69                                                                              |      | 0.376           | 1.75       | 1.10      | 13168     |
| 最小值                                                                                                                                                                                                                                                                                |                | 0.0000      | 9.73       | 24.1430        | 68.12                                                                               |      | 0.347           | 1.75       | 1.10      | 12113     |
| 总和                                                                                                                                                                                                                                                                                 |                | 0.0000      | 100.00     | 248.0297       | 558.81                                                                              |      |                 |            |           |           |
| 峰 峰名称<br>序号                                                                                                                                                                                                                                                                        | 保留时间<br>min    | 样品量<br>n.a. | 相对峰面积<br>% | 峰面积<br>mAU*min | 峰高<br>mAU                                                                           | 类型   | 峰宽 (50%)<br>min | 不对称度<br>EP | 分离度<br>EP | 塔板数<br>EP |
| 1                                                                                                                                                                                                                                                                                  | 17.112         | n.a.        | 8.93       | 69.2341        | 164.00                                                                              | BM*  | 0.437           | n.a.       | 0.90      | 8488      |
| 2                                                                                                                                                                                                                                                                                  | 17.857         | n.a.        | 91.07      | 705.6747       | 1134.46                                                                             | MB*  | 0.540           | n.a.       | n.a.      | 6048      |
| 最大值                                                                                                                                                                                                                                                                                |                | 0.0000      | 91.07      | 705.6747       | 1134.46                                                                             |      | 0.540           | 0.00       | 0.90      | 8488      |
| 最小值                                                                                                                                                                                                                                                                                |                | 0.0000      | 8.93       | 69.2341        | 164.00                                                                              |      | 0.437           | 0.00       | 0.90      | 6048      |
| 总和                                                                                                                                                                                                                                                                                 |                | 0.0000      | 100.00     | 774.9088       | 1298.47                                                                             |      |                 |            |           |           |
|                                                                                                                                                                                                  |                |             |            |                |  |      |                 |            |           |           |
| 90.4% of L-TME initially used                                                                                                                                                                                                                                                      |                |             |            |                | 91.2% of L-TME recovered                                                            |      |                 |            |           |           |
| Signal                                                                                                                                                                                                                                                                             | Retention time | sample      | area%      | area           | height                                                                              | type | half peak wide  | -          | -         | -         |
| 峰 峰名称<br>序号                                                                                                                                                                                                                                                                        | 保留时间<br>min    | 样品量<br>n.a. | 相对峰面积<br>% | 峰面积<br>mAU*min | 峰高<br>mAU                                                                           | 类型   | 峰宽 (50%)<br>min | 不对称度<br>EP | 分离度<br>EP | 塔板数<br>EP |
| 1                                                                                                                                                                                                                                                                                  | 17.065         | n.a.        | 4.82       | 40.7488        | 104.28                                                                              | BM*  | 0.394           | n.a.       | 0.96      | 10388     |
| 2                                                                                                                                                                                                                                                                                  | 17.758         | n.a.        | 95.18      | 804.4848       | 1496.20                                                                             | MB*  | 0.457           | 1.88       | n.a.      | 8368      |
| 最大值                                                                                                                                                                                                                                                                                |                | 0.0000      | 95.18      | 804.4848       | 1496.20                                                                             |      | 0.457           | 1.88       | 0.96      | 10388     |
| 最小值                                                                                                                                                                                                                                                                                |                | 0.0000      | 4.82       | 40.7488        | 104.28                                                                              |      | 0.394           | 1.88       | 0.96      | 8368      |
| 总和                                                                                                                                                                                                                                                                                 |                | 0.0000      | 100.00     | 845.2336       | 1600.48                                                                             |      |                 |            |           |           |
| 峰 峰名称<br>序号                                                                                                                                                                                                                                                                        | 保留时间<br>min    | 样品量<br>n.a. | 相对峰面积<br>% | 峰面积<br>mAU*min | 峰高<br>mAU                                                                           | 类型   | 峰宽 (50%)<br>min | 不对称度<br>EP | 分离度<br>EP | 塔板数<br>EP |
| Table S12 continued                                                                                                                                                                                                                                                                |                | n.a.        | 4.39       | 35.5056        | 83.27                                                                               | BM*  | n.a.            | n.a.       | n.a.      | n.a.      |
| Table S12 continued                                                                                                                                                                                                                                                                |                | n.a.        | 95.61      | 772.4494       | 1210.14                                                                             | MB*  | 0.556           | 1.70       | n.a.      | 5648      |
| Table S12 continued                                                                                                                                                                                                                                                                |                | 0.0000      | 95.61      | 772.4494       | 1210.14                                                                             |      | 0.556           | 1.70       | 0.00      | 5648      |
| Table S12 continued                                                                                                                                                                                                                                                                |                | 0.0000      | 4.39       | 35.5056        | 83.27                                                                               |      | 0.556           | 1.70       | 0.00      | 5648      |
| Table S12 continued                                                                                                                                                                                                                                                                |                | 0.0000      | 100.00     | 807.9550       | 1293.41                                                                             |      |                 |            |           |           |
| <p><sup>a</sup> “Before the reaction” means the HPLC and %ee<sub>1</sub> of L-TME prepared as the starting material. “After the reaction” means HPLC and the corresponding %ee<sub>2</sub> of the L-TME that was recovered from the Pictet-Spengler reaction in HPLC analysis.</p> |                |             |            |                |                                                                                     |      |                 |            |           |           |

Table S13 The HPLC analysis for the L-TME recovered from the second series of condensation.

| Before the reaction <sup>a</sup>                                                                                                                                                                                                                                                                       |                | After the reaction <sup>a</sup>                                                      |            |                |           |      |                 |            |           |           |
|--------------------------------------------------------------------------------------------------------------------------------------------------------------------------------------------------------------------------------------------------------------------------------------------------------|----------------|--------------------------------------------------------------------------------------|------------|----------------|-----------|------|-----------------|------------|-----------|-----------|
| 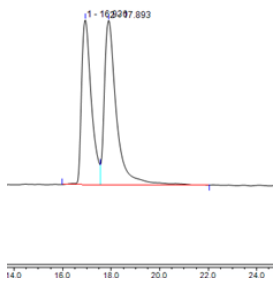                                                                                                                                                                                                                      |                |    |            |                |           |      |                 |            |           |           |
| 10.6% of L-TME initially used                                                                                                                                                                                                                                                                          |                | 11.8% of L-TME recovered                                                             |            |                |           |      |                 |            |           |           |
| Signal                                                                                                                                                                                                                                                                                                 | Retention time | sample                                                                               | area%      | area           | height    | type | half peak wide  | -          | -         | -         |
| 峰 峰名称<br>序号                                                                                                                                                                                                                                                                                            | 保留时间<br>min    | 样品量<br>n.a.                                                                          | 相对峰面积<br>% | 峰面积<br>mAU*min | 峰高<br>mAU | 类型   | 峰宽 (50%)<br>min | 不对称度<br>EP | 分离度<br>EP | 塔板数<br>EP |
| 1                                                                                                                                                                                                                                                                                                      | 16.930         | n.a.                                                                                 | 44.72      | 266.6971       | 571.90    | BM*  | 0.427           | n.a.       | 1.26      | 870       |
| 2                                                                                                                                                                                                                                                                                                      | 17.893         | n.a.                                                                                 | 55.28      | 329.7375       | 569.92    | MB*  | 0.474           | n.a.       | n.a.      | 790       |
| 最大值                                                                                                                                                                                                                                                                                                    |                | 0.0000                                                                               | 55.28      | 329.7375       | 571.90    |      | 0.474           | 0.00       | 1.26      | 870       |
| 最小值                                                                                                                                                                                                                                                                                                    |                | 0.0000                                                                               | 44.72      | 266.6971       | 569.92    |      | 0.427           | 0.00       | 1.26      | 790       |
| 总和                                                                                                                                                                                                                                                                                                     |                | 0.0000                                                                               | 100.00     | 596.4346       | 1141.82   |      |                 |            |           |           |
| 峰 峰名称<br>序号                                                                                                                                                                                                                                                                                            | 保留时间<br>min    | 样品量<br>n.a.                                                                          | 相对峰面积<br>% | 峰面积<br>mAU*min | 峰高<br>mAU | 类型   | 峰宽 (50%)<br>min | 不对称度<br>EP | 分离度<br>EP | 塔板数<br>EP |
| 1                                                                                                                                                                                                                                                                                                      | 16.868         | n.a.                                                                                 | 44.09      | 619.0041       | 1053.26   | BM*  | 0.584           | n.a.       | 0.94      | 4629      |
| 2                                                                                                                                                                                                                                                                                                      | 17.837         | n.a.                                                                                 | 55.91      | 784.9343       | 1084.73   | MB*  | 0.632           | n.a.       | n.a.      | 4407      |
| 最大值                                                                                                                                                                                                                                                                                                    |                | 0.0000                                                                               | 55.91      | 784.9343       | 1084.73   |      | 0.632           | 0.00       | 0.94      | 4629      |
| 最小值                                                                                                                                                                                                                                                                                                    |                | 0.0000                                                                               | 44.09      | 619.0041       | 1053.26   |      | 0.584           | 0.00       | 0.94      | 4407      |
| 总和                                                                                                                                                                                                                                                                                                     |                | 0.0000                                                                               | 100.00     | 1403.9384      | 2137.99   |      |                 |            |           |           |
|                                                                                                                                                                                                                     |                |  |            |                |           |      |                 |            |           |           |
| 17.9% of L-TME initially used                                                                                                                                                                                                                                                                          |                | 19.0% of L-TME recovered                                                             |            |                |           |      |                 |            |           |           |
| Signal                                                                                                                                                                                                                                                                                                 | Retention time | sample                                                                               | area%      | area           | height    | type | half peak wide  | -          | -         | -         |
| 峰 峰名称<br>序号                                                                                                                                                                                                                                                                                            | 保留时间<br>min    | 样品量<br>n.a.                                                                          | 相对峰面积<br>% | 峰面积<br>mAU*min | 峰高<br>mAU | 类型   | 峰宽 (50%)<br>min | 不对称度<br>EP | 分离度<br>EP | 塔板数<br>EP |
| 1                                                                                                                                                                                                                                                                                                      | 17.072         | n.a.                                                                                 | 41.04      | 163.0883       | 297.17    | BM*  | 0.529           | n.a.       | 0.99      | 576       |
| 2                                                                                                                                                                                                                                                                                                      | 18.003         | n.a.                                                                                 | 58.96      | 234.3166       | 350.96    | MB*  | 0.577           | n.a.       | n.a.      | 539       |
| 最大值                                                                                                                                                                                                                                                                                                    |                | 0.0000                                                                               | 58.96      | 234.3166       | 350.96    |      | 0.577           | 0.00       | 0.99      | 576       |
| 最小值                                                                                                                                                                                                                                                                                                    |                | 0.0000                                                                               | 41.04      | 163.0883       | 297.17    |      | 0.529           | 0.00       | 0.99      | 539       |
| 总和                                                                                                                                                                                                                                                                                                     |                | 0.0000                                                                               | 100.00     | 397.4048       | 648.13    |      |                 |            |           |           |
| 峰 峰名称<br>序号                                                                                                                                                                                                                                                                                            | 保留时间<br>min    | 样品量<br>n.a.                                                                          | 相对峰面积<br>% | 峰面积<br>mAU*min | 峰高<br>mAU | 类型   | 峰宽 (50%)<br>min | 不对称度<br>EP | 分离度<br>EP | 塔板数<br>EP |
| 1                                                                                                                                                                                                                                                                                                      | 16.897         | n.a.                                                                                 | 40.48      | 316.3315       | 663.73    | BM*  | 0.449           | n.a.       | 1.17      | 7862      |
| 2                                                                                                                                                                                                                                                                                                      | 17.827         | n.a.                                                                                 | 59.52      | 465.2138       | 791.71    | MB*  | 0.492           | n.a.       | n.a.      | 7271      |
| 最大值                                                                                                                                                                                                                                                                                                    |                | 0.0000                                                                               | 59.52      | 465.2138       | 791.71    |      | 0.492           | 0.00       | 1.17      | 7862      |
| 最小值                                                                                                                                                                                                                                                                                                    |                | 0.0000                                                                               | 40.48      | 316.3315       | 663.73    |      | 0.449           | 0.00       | 1.17      | 7271      |
| 总和                                                                                                                                                                                                                                                                                                     |                | 0.0000                                                                               | 100.00     | 781.5453       | 1455.43   |      |                 |            |           |           |
| <sup>a</sup> “Before the reaction” means the HPLC plot analyzed for %ee <sub>1</sub> of L-TME prepared as the starting material. <sup>b</sup> “After the reaction” means HPLC plot analyzed for the corresponding %ee <sub>2</sub> of the L-TME that was recovered after the Pictet-Spengler reaction. |                |                                                                                      |            |                |           |      |                 |            |           |           |

|                                                                                     |                |             |            |                                                                                      |           |      |                 |            |           |           |
|-------------------------------------------------------------------------------------|----------------|-------------|------------|--------------------------------------------------------------------------------------|-----------|------|-----------------|------------|-----------|-----------|
| 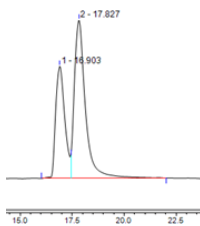   |                |             |            |    |           |      |                 |            |           |           |
| 26.5% of L-TME initially used                                                       |                |             |            | 28.8% of L-TME recovered                                                             |           |      |                 |            |           |           |
| Signal                                                                              | Retention time | sample      | area%      | area                                                                                 | height    | type | half peak wide  | -          | -         |           |
| 峰 峰名称<br>序号                                                                         | 保留时间<br>min    | 样品量<br>n.a. | 相对峰面积<br>% | 峰面积<br>mAU*min                                                                       | 峰高<br>mAU | 类型   | 峰宽 (50%)<br>min | 不对称度<br>EP | 分离度<br>EP | 塔板数<br>EP |
| 1                                                                                   | 16.903         | n.a.        | 36.73      | 342.0223                                                                             | 675.79    | BM*  | 0.480           | n.a.       | 1.08      | 6879      |
| 2                                                                                   | 17.827         | n.a.        | 63.27      | 589.1061                                                                             | 953.39    | MB*  | 0.529           | n.a.       | n.a.      | 6297      |
| 最大值                                                                                 |                | 0.0000      | 63.27      | 589.1061                                                                             | 953.39    |      | 0.529           | 0.00       | 1.08      | 6879      |
| 最小值                                                                                 |                | 0.0000      | 36.73      | 342.0223                                                                             | 675.79    |      | 0.480           | 0.00       | 1.08      | 6297      |
| 总和                                                                                  |                | 0.0000      | 100.00     | 931.1284                                                                             | 1629.19   |      |                 |            |           |           |
| 峰 峰名称<br>序号                                                                         | 保留时间<br>min    | 样品量<br>n.a. | 相对峰面积<br>% | 峰面积<br>mAU*min                                                                       | 峰高<br>mAU | 类型   | 峰宽 (50%)<br>min | 不对称度<br>EP | 分离度<br>EP | 塔板数<br>EP |
| 1                                                                                   | 16.928         | n.a.        | 35.59      | 529.4750                                                                             | 970.47    | BM*  | 0.544           | n.a.       | 0.95      | 537       |
| 2                                                                                   | 17.850         | n.a.        | 64.41      | 958.2383                                                                             | 1407.48   | MB*  | 0.603           | n.a.       | n.a.      | 485       |
| 最大值                                                                                 |                | 0.0000      | 64.41      | 958.2383                                                                             | 1407.48   |      | 0.603           | 0.00       | 0.95      | 537       |
| 最小值                                                                                 |                | 0.0000      | 35.59      | 529.4750                                                                             | 970.47    |      | 0.544           | 0.00       | 0.95      | 485       |
| 总和                                                                                  |                | 0.0000      | 100.00     | 1487.7133                                                                            | 2377.95   |      |                 |            |           |           |
|   |                |             |            |   |           |      |                 |            |           |           |
| 36.7% of L-TME initially used                                                       |                |             |            | 41.5% of L-TME recovered                                                             |           |      |                 |            |           |           |
| Signal                                                                              | Retention time | sample      | area%      | area                                                                                 | height    | type | half peak wide  | -          | -         |           |
| 峰 峰名称<br>序号                                                                         | 保留时间<br>min    | 样品量<br>n.a. | 相对峰面积<br>% | 峰面积<br>mAU*min                                                                       | 峰高<br>mAU | 类型   | 峰宽 (50%)<br>min | 不对称度<br>EP | 分离度<br>EP | 塔板数<br>EP |
| 1                                                                                   | 17.017         | n.a.        | 31.67      | 225.0382                                                                             | 492.55    | BM*  | 0.446           | n.a.       | 0.98      | 808       |
| 2                                                                                   | 17.803         | n.a.        | 68.33      | 485.5694                                                                             | 859.15    | MB*  | 0.499           | n.a.       | n.a.      | 705       |
| 最大值                                                                                 |                | 0.0000      | 68.33      | 485.5694                                                                             | 859.15    |      | 0.499           | 0.00       | 0.98      | 808       |
| 最小值                                                                                 |                | 0.0000      | 31.67      | 225.0382                                                                             | 492.55    |      | 0.446           | 0.00       | 0.98      | 705       |
| 总和                                                                                  |                | 0.0000      | 100.00     | 710.6075                                                                             | 1351.70   |      |                 |            |           |           |
| 峰 峰名称<br>序号                                                                         | 保留时间<br>min    | 样品量<br>n.a. | 相对峰面积<br>% | 峰面积<br>mAU*min                                                                       | 峰高<br>mAU | 类型   | 峰宽 (50%)<br>min | 不对称度<br>EP | 分离度<br>EP | 塔板数<br>EP |
| 1                                                                                   | 17.010         | n.a.        | 29.26      | 322.8895                                                                             | 759.58    | BM*  | 0.423           | n.a.       | 1.02      | 893       |
| 2                                                                                   | 17.787         | n.a.        | 70.74      | 780.6347                                                                             | 1401.53   | MB*  | 0.473           | n.a.       | n.a.      | 783       |
| 最大值                                                                                 |                | 0.0000      | 70.74      | 780.6347                                                                             | 1401.53   |      | 0.473           | 0.00       | 1.02      | 893       |
| 最小值                                                                                 |                | 0.0000      | 29.26      | 322.8895                                                                             | 759.58    |      | 0.423           | 0.00       | 1.02      | 783       |
| 总和                                                                                  |                | 0.0000      | 100.00     | 1103.5242                                                                            | 2161.11   |      |                 |            |           |           |
|  |                |             |            |  |           |      |                 |            |           |           |
| 48.4% of L-TME initially used                                                       |                |             |            | 54.2% of L-TME recovered                                                             |           |      |                 |            |           |           |
| Signal                                                                              | Retention time | sample      | area%      | area                                                                                 | height    | type | half peak wide  | -          | -         |           |

Table S13 continued

| 峰序号 | 峰名称 | 保留时间 min | 样品量 n.a. | 相对峰面积 % | 峰面积 mAU*min | 峰高 mAU  | 类型  | 峰宽 (50%) min | 不对称度 EP | 分离度 EP | 塔板数 EP |
|-----|-----|----------|----------|---------|-------------|---------|-----|--------------|---------|--------|--------|
| 1   |     | 16.985   | n.a.     | 25.82   | 156.3227    | 343.02  | BM* | 0.432        | n.a.    | 1.12   | 854    |
| 2   |     | 17.852   | n.a.     | 74.18   | 449.0213    | 794.45  | MB* | 0.481        | n.a.    | n.a.   | 763    |
| 最大值 |     |          | 0.0000   | 74.18   | 449.0213    | 794.45  |     | 0.481        | 0.00    | 1.12   | 854    |
| 最小值 |     |          | 0.0000   | 25.82   | 156.3227    | 343.02  |     | 0.432        | 0.00    | 1.12   | 763    |
| 总和  |     |          | 0.0000   | 100.00  | 605.3439    | 1137.46 |     |              |         |        |        |

| 峰序号 | 峰名称 | 保留时间 min | 样品量 n.a. | 相对峰面积 % | 峰面积 mAU*min | 峰高 mAU  | 类型  | 峰宽 (50%) min | 不对称度 EP | 分离度 EP | 塔板数 EP |
|-----|-----|----------|----------|---------|-------------|---------|-----|--------------|---------|--------|--------|
| 1   |     | 16.908   | n.a.     | 22.90   | 287.2445    | 639.31  | BM* | 0.465        | n.a.    | 1.01   | 732    |
| 2   |     | 17.760   | n.a.     | 77.10   | 967.1523    | 1559.48 | MB* | 0.526        | n.a.    | n.a.   | 631    |
| 最大值 |     |          | 0.0000   | 77.10   | 967.1523    | 1559.48 |     | 0.526        | 0.00    | 1.01   | 732    |
| 最小值 |     |          | 0.0000   | 22.90   | 287.2445    | 639.31  |     | 0.465        | 0.00    | 1.01   | 631    |
| 总和  |     |          | 0.0000   | 100.00  | 1254.3968   | 2198.78 |     |              |         |        |        |

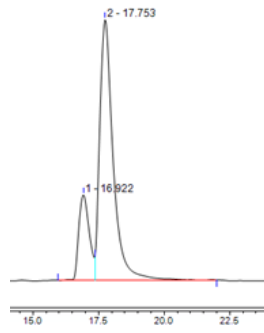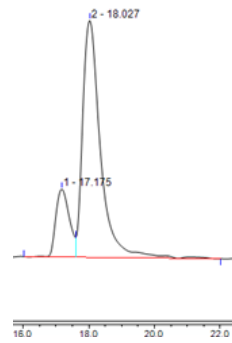

59.0% of L-TME initially used

64.4% of L-TME recovered

| Signal | Retention time | sample   | area%    | area    | height      | type    | half peak wide | -            | -       | -      |        |
|--------|----------------|----------|----------|---------|-------------|---------|----------------|--------------|---------|--------|--------|
| 峰序号    | 峰名称            | 保留时间 min | 样品量 n.a. | 相对峰面积 % | 峰面积 mAU*min | 峰高 mAU  | 类型             | 峰宽 (50%) min | 不对称度 EP | 分离度 EP | 塔板数 EP |
| 1      |                | 16.922   | n.a.     | 20.50   | 217.2808    | 466.32  | BM*            | 0.455        | n.a.    | 1.01   | 765    |
| 2      |                | 17.753   | n.a.     | 79.50   | 842.3683    | 1423.57 | MB*            | 0.517        | n.a.    | n.a.   | 652    |
| 最大值    |                |          | 0.0000   | 79.50   | 842.3683    | 1423.57 |                | 0.517        | 0.00    | 1.01   | 765    |
| 最小值    |                |          | 0.0000   | 20.50   | 217.2808    | 466.32  |                | 0.455        | 0.00    | 1.01   | 652    |
| 总和     |                |          | 0.0000   | 100.00  | 1059.6491   | 1889.89 |                |              |         |        |        |

| 峰序号 | 峰名称 | 保留时间 min | 样品量 n.a. | 相对峰面积 % | 峰面积 mAU*min | 峰高 mAU | 类型  | 峰宽 (50%) min | 不对称度 EP | 分离度 EP | 塔板数 EP |
|-----|-----|----------|----------|---------|-------------|--------|-----|--------------|---------|--------|--------|
| 1   |     | 17.175   | n.a.     | 17.78   | 44.2575     | 93.24  | BM* | 0.470        | n.a.    | 1.00   | 739    |
| 2   |     | 18.027   | n.a.     | 82.22   | 204.7276    | 325.25 | MB* | 0.536        | n.a.    | n.a.   | 627    |
| 最大值 |     |          | 0.0000   | 82.22   | 204.7276    | 325.25 |     | 0.536        | 0.00    | 1.00   | 739    |
| 最小值 |     |          | 0.0000   | 17.78   | 44.2575     | 93.24  |     | 0.470        | 0.00    | 1.00   | 627    |
| 总和  |     |          | 0.0000   | 100.00  | 248.9851    | 418.49 |     |              |         |        |        |

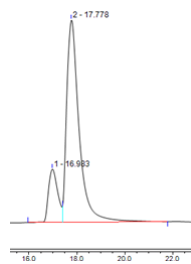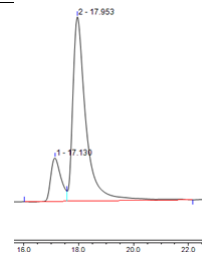

67.2% of L-TME initially used

69.5% of L-TME recovered

| Signal | Retention time | sample   | area%    | area    | height      | type    | half peak wide | -            | -       | -      |        |
|--------|----------------|----------|----------|---------|-------------|---------|----------------|--------------|---------|--------|--------|
| 峰序号    | 峰名称            | 保留时间 min | 样品量 n.a. | 相对峰面积 % | 峰面积 mAU*min | 峰高 mAU  | 类型             | 峰宽 (50%) min | 不对称度 EP | 分离度 EP | 塔板数 EP |
| 1      |                | 16.983   | n.a.     | 16.39   | 195.3745    | 435.62  | BM*            | 0.440        | n.a.    | 0.98   | 8250   |
| 2      |                | 17.778   | n.a.     | 83.61   | 996.7091    | 1653.93 | MB*            | 0.521        | n.a.    | n.a.   | 6456   |
| 最大值    |                |          | 0.0000   | 83.61   | 996.7091    | 1653.93 |                | 0.521        | 0.00    | 0.98   | 8250   |
| 最小值    |                |          | 0.0000   | 16.39   | 195.3745    | 435.62  |                | 0.440        | 0.00    | 0.98   | 6456   |
| 总和     |                |          | 0.0000   | 100.00  | 1192.0836   | 2089.55 |                |              |         |        |        |

| 峰序号 | 峰名称 | 保留时间 min | 样品量 n.a. | 相对峰面积 % | 峰面积 mAU*min | 峰高 mAU | 类型  | 峰宽 (50%) min | 不对称度 EP | 分离度 EP | 塔板数 EP |
|-----|-----|----------|----------|---------|-------------|--------|-----|--------------|---------|--------|--------|
| 1   |     | 17.130   | n.a.     | 15.26   | 53.0016     | 124.61 | BM* | 0.408        | n.a.    | 1.13   | 978    |
| 2   |     | 17.953   | n.a.     | 84.74   | 294.4109    | 529.11 | MB* | 0.452        | n.a.    | n.a.   | 873    |
| 最大值 |     |          | 0.0000   | 84.74   | 294.4109    | 529.11 |     | 0.452        | 0.00    | 1.13   | 978    |
| 最小值 |     |          | 0.0000   | 15.26   | 53.0016     | 124.61 |     | 0.408        | 0.00    | 1.13   | 873    |
| 总和  |     |          | 0.0000   | 100.00  | 347.4125    | 653.72 |     |              |         |        |        |

Table S13 continued

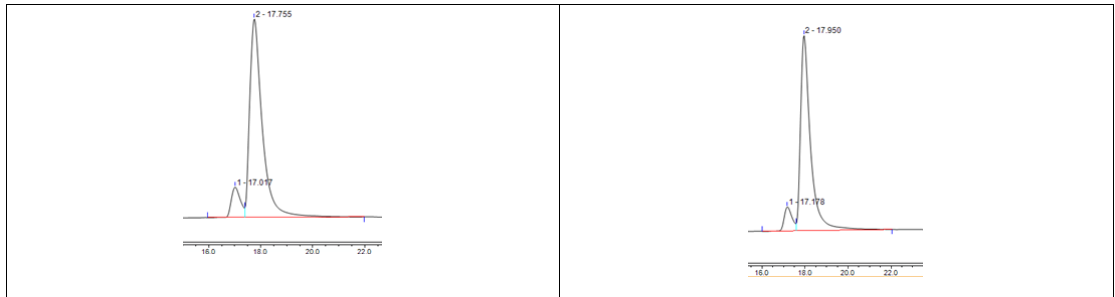

79.9% of L-TME initially used

82.5% of L-TME recovered

| Signal | Retention time | sample | area%  | area      | height  | type | half peak wide | -    | -    | -   |
|--------|----------------|--------|--------|-----------|---------|------|----------------|------|------|-----|
| 峰 峰名称  | 保留时间           | 样品量    | 相对峰面积  | 峰面积       | 峰高      | 类型   | 峰宽 (50%)       | 不对称度 | 分离度  | 塔板数 |
| 序号     | min            | n.a.   | %      | mAU*min   | mAU     |      | min            | EP   | EP   | EP  |
| 1      | 17.017         | n.a.   | 10.03  | 111.3924  | 271.61  | BM*  | 0.402          | n.a. | 0.99 | 993 |
| 2      | 17.755         | n.a.   | 89.97  | 999.1459  | 1784.01 | MB*  | 0.480          | 0.00 | 0.99 | 993 |
| 最大值    |                | 0.0000 | 89.97  | 999.1459  | 1784.01 |      | 0.480          | 0.00 | 0.99 | 993 |
| 最小值    |                | 0.0000 | 10.03  | 111.3924  | 271.61  |      | 0.402          | 0.00 | 0.99 | 759 |
| 总和     |                | 0.0000 | 100.00 | 1110.5383 | 2055.62 |      |                |      |      |     |

| 峰 峰名称 | 保留时间   | 样品量    | 相对峰面积  | 峰面积      | 峰高     | 类型  | 峰宽 (50%) | 不对称度 | 分离度  | 塔板数  |
|-------|--------|--------|--------|----------|--------|-----|----------|------|------|------|
| 序号    | min    | n.a.   | %      | mAU*min  | mAU    |     | min      | EP   | EP   | EP   |
| 1     | 17.178 | n.a.   | 8.77   | 33.1522  | 78.81  | BM* | 0.407    | n.a. | 1.07 | 9883 |
| 2     | 17.950 | n.a.   | 91.23  | 344.8191 | 641.24 | MB* | 0.442    | 1.90 | n.a. | 9143 |
| 最大值   |        | 0.0000 | 91.23  | 344.8191 | 641.24 |     | 0.442    | 1.90 | 1.07 | 9883 |
| 最小值   |        | 0.0000 | 8.77   | 33.1522  | 78.81  |     | 0.407    | 1.90 | 1.07 | 9143 |
| 总和    |        | 0.0000 | 100.00 | 377.9713 | 720.04 |     |          |      |      |      |

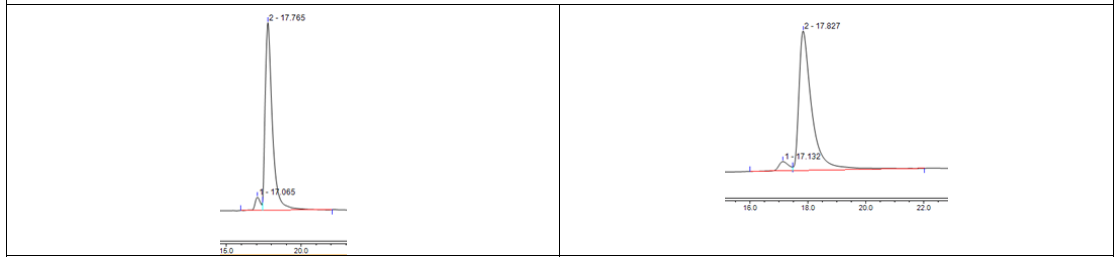

90.2% of L-TME initially used

90.2% of L-TME recovered

| Signal | Retention time | sample | area%  | area     | height  | type | half peak wide | -    | -    | -   |
|--------|----------------|--------|--------|----------|---------|------|----------------|------|------|-----|
| 峰 峰名称  | 保留时间           | 样品量    | 相对峰面积  | 峰面积      | 峰高      | 类型   | 峰宽 (50%)       | 不对称度 | 分离度  | 塔板数 |
| 序号     | min            | n.a.   | %      | mAU*min  | mAU     |      | min            | EP   | EP   | EP  |
| 1      | 17.065         | n.a.   | 4.91   | 44.2486  | 106.87  | BM*  | 0.403          | n.a. | 0.93 | 992 |
| 2      | 17.765         | n.a.   | 95.09  | 856.7635 | 1533.37 | MB*  | 0.484          | 1.76 | n.a. | 745 |
| 最大值    |                | 0.0000 | 95.09  | 856.7635 | 1533.37 |      | 0.484          | 1.76 | 0.93 | 992 |
| 最小值    |                | 0.0000 | 4.91   | 44.2486  | 106.87  |      | 0.403          | 1.76 | 0.93 | 745 |
| 总和     |                | 0.0000 | 100.00 | 901.0121 | 1640.24 |      |                |      |      |     |

| 峰 峰名称 | 保留时间   | 样品量    | 相对峰面积  | 峰面积      | 峰高      | 类型  | 峰宽 (50%) | 不对称度 | 分离度  | 塔板数  |
|-------|--------|--------|--------|----------|---------|-----|----------|------|------|------|
| 序号    | min    | n.a.   | %      | mAU*min  | mAU     |     | min      | EP   | EP   | EP   |
| 1     | 17.132 | n.a.   | 4.89   | 30.3378  | 76.09   | BM* | 0.395    | n.a. | 1.00 | 1042 |
| 2     | 17.827 | n.a.   | 95.11  | 590.0644 | 1144.13 | MB* | 0.422    | 2.04 | n.a. | 986  |
| 最大值   |        | 0.0000 | 95.11  | 590.0644 | 1144.13 |     | 0.422    | 2.04 | 1.00 | 1042 |
| 最小值   |        | 0.0000 | 4.89   | 30.3378  | 76.09   |     | 0.395    | 2.04 | 1.00 | 986  |
| 总和    |        | 0.0000 | 100.00 | 620.4023 | 1220.22 |     |          |      |      |      |

Table S13 continued

Table S14 The HPLC analysis for recovered L-TME from the third series of reactions.

| Before the reaction <sup>a</sup>                                                                                                                                                                                                                                              |                |             |            |                | After the reaction <sup>a</sup>                                                      |      |                 |            |           |           |
|-------------------------------------------------------------------------------------------------------------------------------------------------------------------------------------------------------------------------------------------------------------------------------|----------------|-------------|------------|----------------|--------------------------------------------------------------------------------------|------|-----------------|------------|-----------|-----------|
| 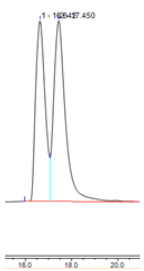                                                                                                                                                                                             |                |             |            |                |   |      |                 |            |           |           |
| 11.3% of L-TME initially used                                                                                                                                                                                                                                                 |                |             |            |                | 12.2% of L-TME recovered                                                             |      |                 |            |           |           |
| Signal                                                                                                                                                                                                                                                                        | Retention time | sample      | area%      | area           | height                                                                               | type | half peak wide  | -          | -         | -         |
| 峰 峰名称<br>序号                                                                                                                                                                                                                                                                   | 保留时间<br>min    | 样品量<br>n.a. | 相对峰面积<br>% | 峰面积<br>mAU*min | 峰高<br>mAU                                                                            | 类型   | 峰宽 (50%)<br>min | 不对称度<br>EP | 分离度<br>EP | 塔板数<br>EP |
| 1                                                                                                                                                                                                                                                                             | 16.642         | n.a.        | 44.36      | 597.4715       | 1268.69                                                                              | BM*  | 0.464           | n.a.       | 0.98      | 7119      |
| 2                                                                                                                                                                                                                                                                             | 17.450         | n.a.        | 55.64      | 749.2548       | 1270.69                                                                              | MB*  | 0.511           | n.a.       | n.a.      | 6463      |
| 最大值                                                                                                                                                                                                                                                                           |                | 0.0000      | 55.64      | 749.2548       | 1270.69                                                                              |      | 0.511           | 0.00       | 0.98      | 7119      |
| 最小值                                                                                                                                                                                                                                                                           |                | 0.0000      | 44.36      | 597.4715       | 1268.69                                                                              |      | 0.464           | 0.00       | 0.98      | 6463      |
| 总和                                                                                                                                                                                                                                                                            |                | 0.0000      | 100.00     | 1346.7263      | 2539.37                                                                              |      |                 |            |           |           |
| 峰 峰名称<br>序号                                                                                                                                                                                                                                                                   | 保留时间<br>min    | 样品量<br>n.a. | 相对峰面积<br>% | 峰面积<br>mAU*min | 峰高<br>mAU                                                                            | 类型   | 峰宽 (50%)<br>min | 不对称度<br>EP | 分离度<br>EP | 塔板数<br>EP |
| 1                                                                                                                                                                                                                                                                             | 16.878         | n.a.        | 43.90      | 106.5404       | 254.81                                                                               | BM*  | 0.379           | n.a.       | 1.21      | 10973     |
| 2                                                                                                                                                                                                                                                                             | 17.687         | n.a.        | 56.10      | 136.1750       | 257.43                                                                               | MB*  | 0.412           | n.a.       | n.a.      | 10217     |
| 最大值                                                                                                                                                                                                                                                                           |                | 0.0000      | 56.10      | 136.1750       | 257.43                                                                               |      | 0.412           | 0.00       | 1.21      | 10973     |
| 最小值                                                                                                                                                                                                                                                                           |                | 0.0000      | 43.90      | 106.5404       | 254.81                                                                               |      | 0.379           | 0.00       | 1.21      | 10217     |
| 总和                                                                                                                                                                                                                                                                            |                | 0.0000      | 100.00     | 242.7154       | 512.24                                                                               |      |                 |            |           |           |
|                                                                                                                                                                                            |                |             |            |                |  |      |                 |            |           |           |
| 17.9% of L-TME initially used                                                                                                                                                                                                                                                 |                |             |            |                | 18.8% of L-TME recovered                                                             |      |                 |            |           |           |
| Signal                                                                                                                                                                                                                                                                        | Retention time | sample      | area%      | area           | height                                                                               | type | half peak wide  | -          | -         | -         |
| 峰 峰名称<br>序号                                                                                                                                                                                                                                                                   | 保留时间<br>min    | 样品量<br>n.a. | 相对峰面积<br>% | 峰面积<br>mAU*min | 峰高<br>mAU                                                                            | 类型   | 峰宽 (50%)<br>min | 不对称度<br>EP | 分离度<br>EP | 塔板数<br>EP |
| 1                                                                                                                                                                                                                                                                             | 16.877         | n.a.        | 41.06      | 235.0304       | 530.43                                                                               | BM*  | 0.425           | n.a.       | 1.05      | 8728      |
| 2                                                                                                                                                                                                                                                                             | 17.668         | n.a.        | 58.94      | 337.3636       | 616.96                                                                               | MB*  | 0.466           | n.a.       | n.a.      | 7965      |
| 最大值                                                                                                                                                                                                                                                                           |                | 0.0000      | 58.94      | 337.3636       | 616.96                                                                               |      | 0.466           | 0.00       | 1.05      | 8728      |
| 最小值                                                                                                                                                                                                                                                                           |                | 0.0000      | 41.06      | 235.0304       | 530.43                                                                               |      | 0.425           | 0.00       | 1.05      | 7965      |
| 总和                                                                                                                                                                                                                                                                            |                | 0.0000      | 100.00     | 572.3940       | 1147.39                                                                              |      |                 |            |           |           |
| 峰 峰名称<br>序号                                                                                                                                                                                                                                                                   | 保留时间<br>min    | 样品量<br>n.a. | 相对峰面积<br>% | 峰面积<br>mAU*min | 峰高<br>mAU                                                                            | 类型   | 峰宽 (50%)<br>min | 不对称度<br>EP | 分离度<br>EP | 塔板数<br>EP |
| 1                                                                                                                                                                                                                                                                             | 16.838         | n.a.        | 40.58      | 277.2027       | 689.13                                                                               | BM*  | 0.379           | n.a.       | 1.17      | 10949     |
| 2                                                                                                                                                                                                                                                                             | 17.628         | n.a.        | 59.42      | 405.8928       | 798.17                                                                               | MB*  | 0.418           | n.a.       | n.a.      | 9863      |
| 最大值                                                                                                                                                                                                                                                                           |                | 0.0000      | 59.42      | 405.8928       | 798.17                                                                               |      | 0.418           | 0.00       | 1.17      | 10949     |
| 最小值                                                                                                                                                                                                                                                                           |                | 0.0000      | 40.58      | 277.2027       | 689.13                                                                               |      | 0.379           | 0.00       | 1.17      | 9863      |
| 总和                                                                                                                                                                                                                                                                            |                | 0.0000      | 100.00     | 683.0955       | 1487.30                                                                              |      |                 |            |           |           |
| <sup>a</sup> “Before the reaction” means the HPLC and %ee <sub>1</sub> of L-TME prepared as the starting material. “After the reaction” means HPLC and the corresponding %ee <sub>2</sub> of the L-TME that was recovered from the Pictet-Spengler reaction in HPLC analysis. |                |             |            |                |                                                                                      |      |                 |            |           |           |

|                                                                                     |                |                                                                                      |            |                |           |      |                 |            |           |           |
|-------------------------------------------------------------------------------------|----------------|--------------------------------------------------------------------------------------|------------|----------------|-----------|------|-----------------|------------|-----------|-----------|
| 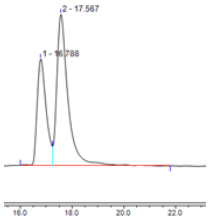   |                |    |            |                |           |      |                 |            |           |           |
| 27.4% of L-TME initially used                                                       |                | 29.7% of L-TME recovered                                                             |            |                |           |      |                 |            |           |           |
| Signal                                                                              | Retention time | sample                                                                               | area%      | area           | height    | type | half peak wide  | -          | -         | -         |
| 峰 峰名称<br>序号                                                                         | 保留时间<br>min    | 样品量<br>n.a.                                                                          | 相对峰面积<br>% | 峰面积<br>mAU*min | 峰高<br>mAU | 类型   | 峰宽 (50%)<br>min | 不对称度<br>EP | 分离度<br>EP | 塔板数<br>EP |
| 1                                                                                   | 16.788         | n.a.                                                                                 | 36.32      | 231.7504       | 574.85    | BM*  | 0.377           | n.a.       | 1.16      | 11004     |
| 2                                                                                   | 17.567         | n.a.                                                                                 | 63.68      | 406.3239       | 815.43    | MB*  | 0.415           | n.a.       | n.a.      | 9909      |
| 最大值                                                                                 |                | 0.0000                                                                               | 63.68      | 406.3239       | 815.43    |      | 0.415           | 0.00       | 1.16      | 11004     |
| 最小值                                                                                 |                | 0.0000                                                                               | 36.32      | 231.7504       | 574.85    |      | 0.377           | 0.00       | 1.16      | 9909      |
| 总和                                                                                  |                | 0.0000                                                                               | 100.00     | 638.0742       | 1390.28   |      |                 |            |           |           |
| 峰 峰名称<br>序号                                                                         | 保留时间<br>min    | 样品量<br>n.a.                                                                          | 相对峰面积<br>% | 峰面积<br>mAU*min | 峰高<br>mAU | 类型   | 峰宽 (50%)<br>min | 不对称度<br>EP | 分离度<br>EP | 塔板数<br>EP |
| 1                                                                                   | 16.745         | n.a.                                                                                 | 35.14      | 322.1469       | 778.04    | BM*  | 0.399           | n.a.       | 1.08      | 9754      |
| 2                                                                                   | 17.518         | n.a.                                                                                 | 64.86      | 594.5839       | 1129.64   | MB*  | 0.442           | n.a.       | n.a.      | 8689      |
| 最大值                                                                                 |                | 0.0000                                                                               | 64.86      | 594.5839       | 1129.64   |      | 0.442           | 0.00       | 1.08      | 9754      |
| 最小值                                                                                 |                | 0.0000                                                                               | 35.14      | 322.1469       | 778.04    |      | 0.399           | 0.00       | 1.08      | 8689      |
| 总和                                                                                  |                | 0.0000                                                                               | 100.00     | 916.7308       | 1907.67   |      |                 |            |           |           |
|   |                |   |            |                |           |      |                 |            |           |           |
| 37.6% of L-TME initially used                                                       |                | 40.7% of L-TME recovered                                                             |            |                |           |      |                 |            |           |           |
| Signal                                                                              | Retention time | sample                                                                               | area%      | area           | height    | type | half peak wide  | -          | -         | -         |
| 峰 峰名称<br>序号                                                                         | 保留时间<br>min    | 样品量<br>n.a.                                                                          | 相对峰面积<br>% | 峰面积<br>mAU*min | 峰高<br>mAU | 类型   | 峰宽 (50%)<br>min | 不对称度<br>EP | 分离度<br>EP | 塔板数<br>EP |
| 1                                                                                   | 16.822         | n.a.                                                                                 | 31.22      | 159.2300       | 395.16    | BM*  | 0.375           | n.a.       | 1.13      | 11129     |
| 2                                                                                   | 17.585         | n.a.                                                                                 | 68.78      | 350.7180       | 698.14    | MB*  | 0.418           | n.a.       | n.a.      | 9786      |
| 最大值                                                                                 |                | 0.0000                                                                               | 68.78      | 350.7180       | 698.14    |      | 0.418           | 0.00       | 1.13      | 11129     |
| 最小值                                                                                 |                | 0.0000                                                                               | 31.22      | 159.2300       | 395.16    |      | 0.375           | 0.00       | 1.13      | 9786      |
| 总和                                                                                  |                | 0.0000                                                                               | 100.00     | 509.9479       | 1093.30   |      |                 |            |           |           |
| 峰 峰名称<br>序号                                                                         | 保留时间<br>min    | 样品量<br>n.a.                                                                          | 相对峰面积<br>% | 峰面积<br>mAU*min | 峰高<br>mAU | 类型   | 峰宽 (50%)<br>min | 不对称度<br>EP | 分离度<br>EP | 塔板数<br>EP |
| 1                                                                                   | 16.877         | n.a.                                                                                 | 29.66      | 201.4859       | 481.71    | BM*  | 0.408           | n.a.       | 1.03      | 9476      |
| 2                                                                                   | 17.628         | n.a.                                                                                 | 70.34      | 477.7727       | 877.88    | MB*  | 0.456           | n.a.       | n.a.      | 8289      |
| 最大值                                                                                 |                | 0.0000                                                                               | 70.34      | 477.7727       | 877.88    |      | 0.456           | 0.00       | 1.03      | 9476      |
| 最小值                                                                                 |                | 0.0000                                                                               | 29.66      | 201.4859       | 481.71    |      | 0.408           | 0.00       | 1.03      | 8289      |
| 总和                                                                                  |                | 0.0000                                                                               | 100.00     | 679.2585       | 1359.59   |      |                 |            |           |           |
|  |                |  |            |                |           |      |                 |            |           |           |
| 47.9% of L-TME initially used                                                       |                | 51.4% of L-TME recovered                                                             |            |                |           |      |                 |            |           |           |
| Signal                                                                              | Retention time | sample                                                                               | area%      | area           | height    | type | half peak wide  | -          | -         | -         |
| 峰 峰名称<br>序号                                                                         | 保留时间<br>min    | 样品量<br>n.a.                                                                          | 相对峰面积<br>% | 峰面积<br>mAU*min | 峰高<br>mAU | 类型   | 峰宽 (50%)<br>min | 不对称度<br>EP | 分离度<br>EP | 塔板数<br>EP |
| 1                                                                                   | 17.005         | n.a.                                                                                 | 26.06      | 131.8176       | 304.98    | BM*  | 0.397           | n.a.       | 1.25      | 10183     |
| 2                                                                                   | 17.885         | n.a.                                                                                 | 73.94      | 373.9723       | 695.38    | MB*  | 0.436           | n.a.       | n.a.      | 9306      |
| 最大值                                                                                 |                | 0.0000                                                                               | 73.94      | 373.9723       | 695.38    |      | 0.436           | 0.00       | 1.25      | 10183     |
| 最小值                                                                                 |                | 0.0000                                                                               | 26.06      | 131.8176       | 304.98    |      | 0.397           | 0.00       | 1.25      | 9306      |
| 总和                                                                                  |                | 0.0000                                                                               | 100.00     | 505.7899       | 1000.36   |      |                 |            |           |           |

Table S14 continued

| 峰序号 | 峰名称 | 保留时间 min | 样品量 n.a. | 相对峰面积 % | 峰面积 mAU*min | 峰高 mAU  | 类型  | 峰宽 (50%) min | 不对称度 EP | 分离度 EP | 塔板数 EP |
|-----|-----|----------|----------|---------|-------------|---------|-----|--------------|---------|--------|--------|
| 1   |     | 16.802   | n.a.     | 24.28   | 174.9958    | 445.25  | BM* | 0.380        | n.a.    | 1.07   | 10845  |
| 2   |     | 17.532   | n.a.     | 75.72   | 545.8648    | 1064.34 | MB* | 0.428        | n.a.    | n.a.   | 9287   |
| 最大值 |     |          | 0.0000   | 75.72   | 545.8648    | 1064.34 |     | 0.428        | 0.00    | 1.07   | 10845  |
| 最小值 |     |          | 0.0000   | 24.28   | 174.9958    | 445.25  |     | 0.380        | 0.00    | 1.07   | 9287   |
| 总和  |     |          | 0.0000   | 100.00  | 720.8606    | 1509.58 |     |              |         |        |        |

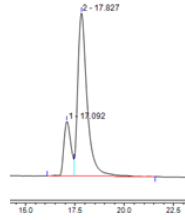

60.2% of L-TME initially used

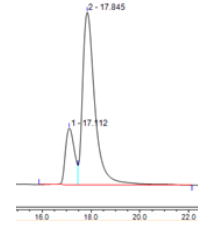

61.7% of L-TME recovered

| Signal | Retention time | sample   | area%    | area    | height      | type    | half peak wide | -            | -       | -      |        |
|--------|----------------|----------|----------|---------|-------------|---------|----------------|--------------|---------|--------|--------|
| 峰序号    | 峰名称            | 保留时间 min | 样品量 n.a. | 相对峰面积 % | 峰面积 mAU*min | 峰高 mAU  | 类型             | 峰宽 (50%) min | 不对称度 EP | 分离度 EP | 塔板数 EP |
| 1      |                | 17.092   | n.a.     | 19.91   | 144.3525    | 351.13  | BM*            | 0.408        | n.a.    | 0.98   | 9734   |
| 2      |                | 17.827   | n.a.     | 80.09   | 580.7376    | 1049.80 | MB*            | 0.475        | n.a.    | n.a.   | 7787   |
| 最大值    |                |          | 0.0000   | 80.09   | 580.7376    | 1049.80 |                | 0.475        | 0.00    | 0.98   | 9734   |
| 最小值    |                |          | 0.0000   | 19.91   | 144.3525    | 351.13  |                | 0.408        | 0.00    | 0.98   | 7787   |
| 总和     |                |          | 0.0000   | 100.00  | 725.0901    | 1400.92 |                |              |         |        |        |

| 峰序号 | 峰名称 | 保留时间 min | 样品量 n.a. | 相对峰面积 % | 峰面积 mAU*min | 峰高 mAU | 类型  | 峰宽 (50%) min | 不对称度 EP | 分离度 EP | 塔板数 EP |
|-----|-----|----------|----------|---------|-------------|--------|-----|--------------|---------|--------|--------|
| 1   |     | 17.112   | n.a.     | 19.15   | 99.4853     | 233.82 | BM* | 0.431        | n.a.    | 0.93   | 8715   |
| 2   |     | 17.845   | n.a.     | 80.85   | 419.8940    | 714.23 | MB* | 0.502        | n.a.    | n.a.   | 7002   |
| 最大值 |     |          | 0.0000   | 80.85   | 419.8940    | 714.23 |     | 0.502        | 0.00    | 0.93   | 8715   |
| 最小值 |     |          | 0.0000   | 19.15   | 99.4853     | 233.82 |     | 0.431        | 0.00    | 0.93   | 7002   |
| 总和  |     |          | 0.0000   | 100.00  | 519.3793    | 948.04 |     |              |         |        |        |

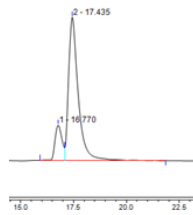

69.8% of L-TME initially used

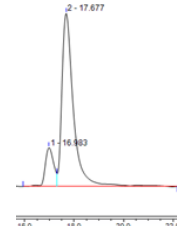

71.8% of L-TME recovered

| Signal | Retention time | sample   | area%    | area    | height      | type    | half peak wide | -            | -       | -      |        |
|--------|----------------|----------|----------|---------|-------------|---------|----------------|--------------|---------|--------|--------|
| 峰序号    | 峰名称            | 保留时间 min | 样品量 n.a. | 相对峰面积 % | 峰面积 mAU*min | 峰高 mAU  | 类型             | 峰宽 (50%) min | 不对称度 EP | 分离度 EP | 塔板数 EP |
| 1      |                | 16.770   | n.a.     | 15.10   | 187.0141    | 489.44  | BM*            | 0.383        | n.a.    | 0.93   | 10613  |
| 2      |                | 17.435   | n.a.     | 84.90   | 1051.3968   | 1986.90 | MB*            | 0.458        | n.a.    | n.a.   | 8040   |
| 最大值    |                |          | 0.0000   | 84.90   | 1051.3968   | 1986.90 |                | 0.458        | 0.00    | 0.93   | 10613  |
| 最小值    |                |          | 0.0000   | 15.10   | 187.0141    | 489.44  |                | 0.383        | 0.00    | 0.93   | 8040   |
| 总和     |                |          | 0.0000   | 100.00  | 1238.4109   | 2476.34 |                |              |         |        |        |

| 峰序号 | 峰名称 | 保留时间 min | 样品量 n.a. | 相对峰面积 % | 峰面积 mAU*min | 峰高 mAU | 类型  | 峰宽 (50%) min | 不对称度 EP | 分离度 EP | 塔板数 EP |
|-----|-----|----------|----------|---------|-------------|--------|-----|--------------|---------|--------|--------|
| 1   |     | 16.983   | n.a.     | 14.08   | 49.6434     | 125.16 | BM* | 0.388        | n.a.    | 0.97   | 10604  |
| 2   |     | 17.677   | n.a.     | 85.92   | 302.8691    | 560.61 | MB* | 0.452        | n.a.    | n.a.   | 8462   |
| 最大值 |     |          | 0.0000   | 85.92   | 302.8691    | 560.61 |     | 0.452        | 0.00    | 0.97   | 10604  |
| 最小值 |     |          | 0.0000   | 14.08   | 49.6434     | 125.16 |     | 0.388        | 0.00    | 0.97   | 8462   |
| 总和  |     |          | 0.0000   | 100.00  | 352.5126    | 685.77 |     |              |         |        |        |

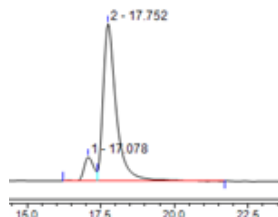

80.1% of L-TME initially used

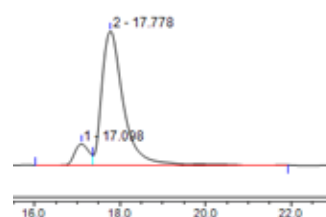

81.2% of L-TME recovered

| Signal | Retention time | sample | area% | area | height | type | half peak wide | - | - | - |
|--------|----------------|--------|-------|------|--------|------|----------------|---|---|---|
|--------|----------------|--------|-------|------|--------|------|----------------|---|---|---|

| 峰序号 | 峰名称 | 保留时间 min | 样品量 n.a. | 相对峰面积 % | 峰面积 mAU*min | 峰高 mAU  | 类型  | 峰宽 (50%) min | 不对称度 EP | 分离度 EP | 塔板数 EP |
|-----|-----|----------|----------|---------|-------------|---------|-----|--------------|---------|--------|--------|
| 1   |     | 17.078   | n.a.     | 9.93    | 58.3722     | 156.05  | BM* | 0.375        | n.a.    | 0.98   | 11470  |
| 2   |     | 17.752   | n.a.     | 90.07   | 529.7426    | 1032.46 | MB* | 0.436        | n.a.    | n.a.   | 9194   |
| 最大值 |     | 0.0000   |          | 90.07   | 529.7426    | 1032.46 |     | 0.436        | 0.00    | 0.98   | 11470  |
| 最小值 |     | 0.0000   |          | 9.93    | 58.3722     | 156.05  |     | 0.375        | 0.00    | 0.98   | 9194   |
| 总和  |     | 0.0000   |          | 100.00  | 588.1148    | 1188.51 |     |              |         |        |        |

  

| 峰序号 | 峰名称 | 保留时间 min | 样品量 n.a. | 相对峰面积 % | 峰面积 mAU*min | 峰高 mAU | 类型  | 峰宽 (50%) min | 不对称度 EP | 分离度 EP | 塔板数 EP |
|-----|-----|----------|----------|---------|-------------|--------|-----|--------------|---------|--------|--------|
| 1   |     | 17.098   | n.a.     | 9.38    | 50.0182     | 131.21 | BM* | 0.413        | n.a.    | 0.87   | 9495   |
| 2   |     | 17.778   | n.a.     | 90.62   | 483.3435    | 831.36 | MB* | 0.507        | n.a.    | n.a.   | 6818   |
| 最大值 |     | 0.0000   |          | 90.62   | 483.3435    | 831.36 |     | 0.507        | 0.00    | 0.87   | 9495   |
| 最小值 |     | 0.0000   |          | 9.38    | 50.0182     | 131.21 |     | 0.413        | 0.00    | 0.87   | 6818   |
| 总和  |     | 0.0000   |          | 100.00  | 533.3617    | 962.57 |     |              |         |        |        |

  

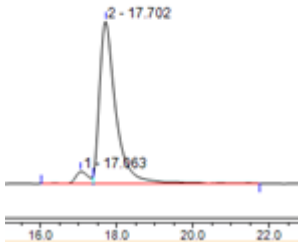

89.1% of L-TME initially used



90.6% of L-TME recovered

  

| Signal | Retention time | sample   | area%    | area    | height      | type    | half peak wide | -            | -       | -      |        |
|--------|----------------|----------|----------|---------|-------------|---------|----------------|--------------|---------|--------|--------|
| 峰序号    | 峰名称            | 保留时间 min | 样品量 n.a. | 相对峰面积 % | 峰面积 mAU*min | 峰高 mAU  | 类型             | 峰宽 (50%) min | 不对称度 EP | 分离度 EP | 塔板数 EP |
| 1      |                | 17.063   | n.a.     | 5.44    | 27.5114     | 71.68   | BM*            | 0.377        | n.a.    | 0.94   | 11323  |
| 2      |                | 17.702   | n.a.     | 94.56   | 477.8001    | 959.20  | MB*            | 0.421        | 1.75    | n.a.   | 9790   |
| 最大值    |                | 0.0000   |          | 94.56   | 477.8001    | 959.20  |                | 0.421        | 1.75    | 0.94   | 11323  |
| 最小值    |                | 0.0000   |          | 5.44    | 27.5114     | 71.68   |                | 0.377        | 1.75    | 0.94   | 9790   |
| 总和     |                | 0.0000   |          | 100.00  | 505.3115    | 1030.88 |                |              |         |        |        |

  

| 峰序号 | 峰名称 | 保留时间 min | 样品量 n.a. | 相对峰面积 % | 峰面积 mAU*min | 峰高 mAU | 类型  | 峰宽 (50%) min | 不对称度 EP | 分离度 EP | 塔板数 EP |
|-----|-----|----------|----------|---------|-------------|--------|-----|--------------|---------|--------|--------|
| 1   |     | 17.245   | n.a.     | 4.69    | 15.8514     | 42.65  | BM* | n.a.         | n.a.    | n.a.   | n.a.   |
| 2   |     | 17.880   | n.a.     | 95.31   | 321.8258    | 599.47 | MB* | 0.446        | 1.69    | n.a.   | 8897   |
| 最大值 |     | 0.0000   |          | 95.31   | 321.8258    | 599.47 |     | 0.446        | 1.69    | 0.00   | 8897   |
| 最小值 |     | 0.0000   |          | 4.69    | 15.8514     | 42.65  |     | 0.446        | 1.69    | 0.00   | 8897   |
| 总和  |     | 0.0000   |          | 100.00  | 337.6772    | 642.12 |     |              |         |        |        |

Table S14 continued

**These data from Tables S13 to S15 (three series of experiments) are summarized in Table S15**

Table S15 The summaries from the Tables S13 to S14 <sup>a,b</sup>

| Entry | %ee <sub>1</sub> of L-TME initially used |                        |                        | %ee <sub>2</sub> of L-TME recovered         |                        |                        | Δ%ee (%ee <sub>2</sub> -%ee <sub>1</sub> ) |                        |                        |
|-------|------------------------------------------|------------------------|------------------------|---------------------------------------------|------------------------|------------------------|--------------------------------------------|------------------------|------------------------|
|       | 1 <sup>st</sup> series                   | 2 <sup>nd</sup> series | 3 <sup>rd</sup> series | 1 <sup>st</sup> series (yield) <sup>b</sup> | 2 <sup>nd</sup> series | 3 <sup>rd</sup> series | 1 <sup>st</sup> series                     | 2 <sup>nd</sup> series | 3 <sup>rd</sup> series |
| 1     | 10.3                                     | 10.6                   | 11.3                   | 11.8<br>(62%)                               | 11.8<br>(61%)          | 12.2<br>(55%)          | 1.5                                        | 1.2                    | 0.9                    |
| 2     | 18.7                                     | 17.9                   | 17.9                   | 20.9<br>(60%)                               | 19.0<br>(56%)          | 18.8<br>(53%)          | 2.2                                        | 1.1                    | 0.9                    |
| 3     | 27.1                                     | 26.5                   | 27.4                   | 29.4<br>(58%)                               | 28.8<br>(55%)          | 29.7<br>(55%)          | 2.3                                        | 2.3                    | 2.3                    |
| 4     | 36.6                                     | 36.7                   | 37.6                   | 42.2<br>(59%)                               | 41.5<br>(55%)          | 40.7<br>(51%)          | 5.6                                        | 4.8                    | 3.1                    |
| 5     | 47.7                                     | 48.4                   | 47.9                   | 50.2<br>(56%)                               | 54.2<br>(56%)          | 51.4<br>(52%)          | 2.5                                        | 5.8                    | 3.5                    |
| 6     | 57.8                                     | 59.0                   | 60.2                   | 58.4<br>(60%)                               | 64.4<br>(62%)          | 61.7<br>(53%)          | 0.6                                        | 5.4                    | 1.5                    |
| 7     | 69.4                                     | 67.2                   | 69.8                   | 70.3<br>(64%)                               | 69.5<br>(61%)          | 71.8<br>(53%)          | 0.9                                        | 2.3                    | 2.0                    |
| 8     | 80.5                                     | 79.9                   | 80.1                   | 82.1<br>(62%)                               | 82.5<br>(63%)          | 81.2<br>(56%)          | 1.6                                        | 2.6                    | 1.1                    |
| 9     | 90.4                                     | 90.2                   | 89.1                   | 91.2<br>(60%)                               | 90.22<br>(56%)         | 90.6<br>(52%)          | 0.8                                        | 0.0<br>(0.04)          | 1.5                    |

<sup>a</sup>The equilibrium time was 2 h in the first series of reactions, 10 h in the second series, and 36 h. in the third series. <sup>b</sup>Table S13 data are listed in the “%ee<sub>1</sub> 1<sup>st</sup> series” column; Table S14 data are listed in the 2<sup>nd</sup> series of column; the Table S15 data are listed in 3<sup>rd</sup> series of column. The data in parentheses are the yields to the recovered material of **1** and **2**.

## Item 9. Analysis of %ee values of (*S*)-benzamide via HPLC

To make sure the original %ee<sub>1</sub> values, the L-TME prepared with about 1%ee was converted into the corresponding benzamide as illustrated below. Theoretically, the %ee of the L-TME will equal to the (*S*)-benzamide's %ee.

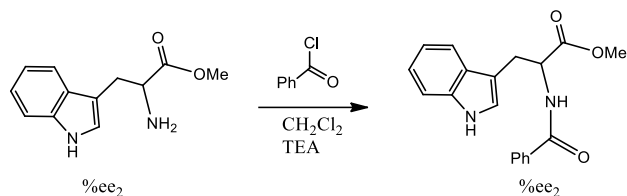

The amide structure was identified by NMR spectra below (Figures S11 and S12)

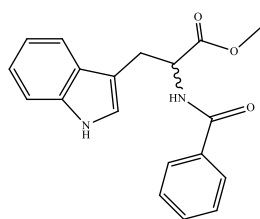

WJ-SH-1  
PROTON CDCl<sub>3</sub> D:\\ zhuhuajie 17

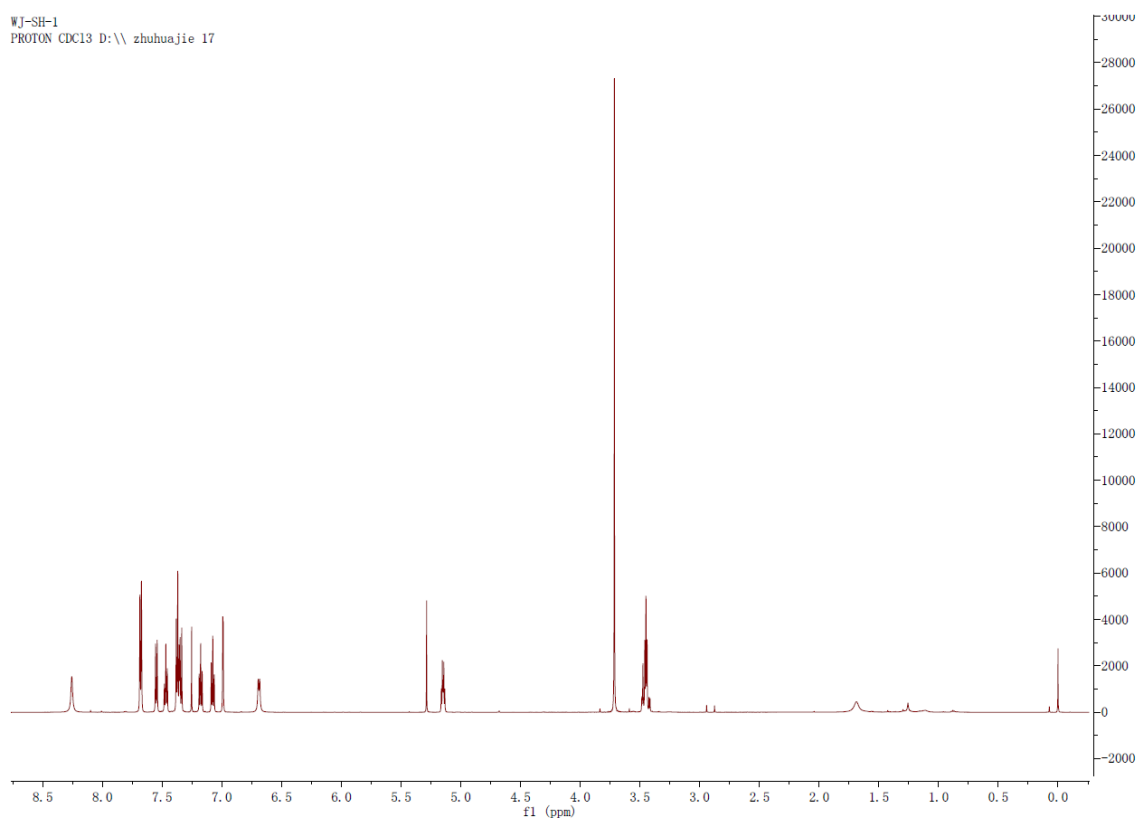

Fig. S9 The <sup>1</sup>H NMR spectra for the structure of methyl 2-benzamido-3-(1H-indol-3-yl)propanoate

<sup>1</sup>H NMR (600 MHz, CDCl<sub>3</sub>) δ 8.26 (s, 1 H), 7.68 (d, *J* = 7.9 Hz, 2 H), 7.55 (d, *J* = 7.9 Hz, 1 H), 7.47 (t, *J* = 7.4 Hz, 1 H), 7.40 – 7.32 (m, 3 H), 7.18 (t, *J* = 7.6 Hz, 1 H), 7.08 (t, *J* = 7.5 Hz, 1 H), 6.99 (d, *J* = 2.1 Hz, 1 H), 6.69 (d, *J* = 7.4 Hz, 1 H), 5.15 (dt, *J* = 7.5, 5.3 Hz, 1 H), 3.71 (s, 3 H), 3.45 (t, *J* = 5.8 Hz, 2 H).

WJ-SH-1  
c13cpd-2 CDCl3 D:\\ zhuhuajie 17

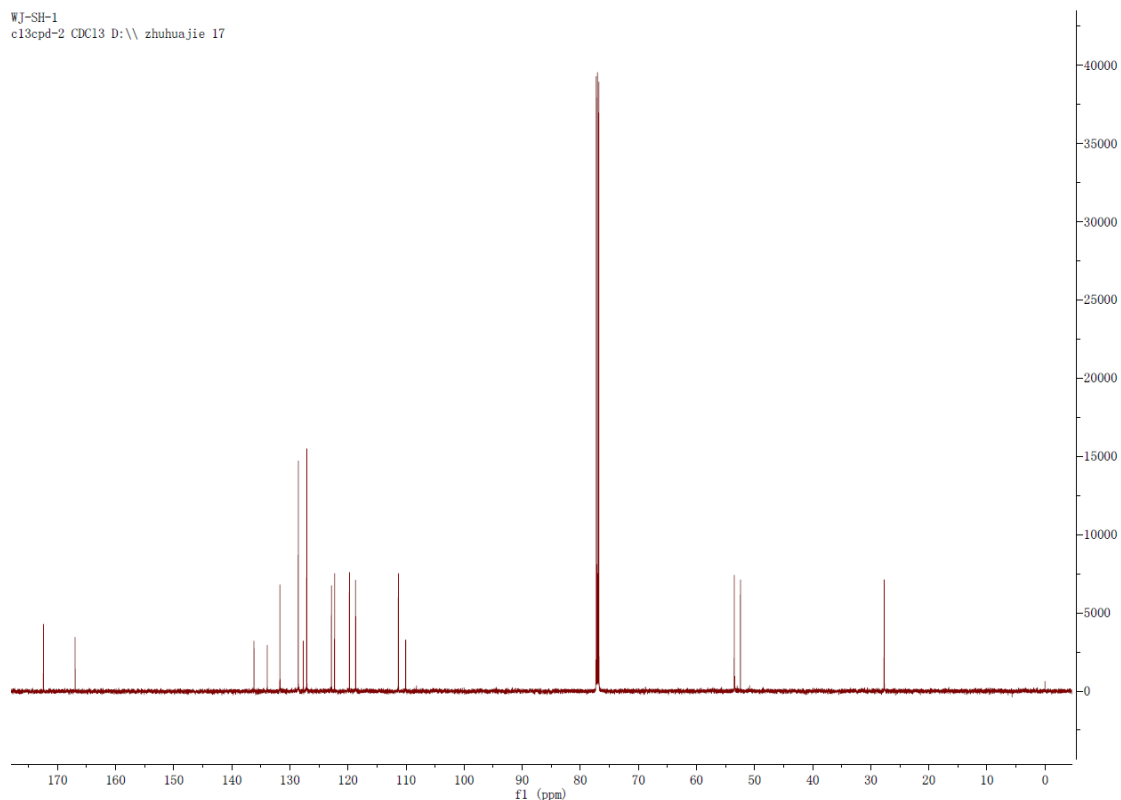

Fig. S10 The <sup>13</sup>C NMR spectra for the structure of methyl 2-benzamido-3-(1H-indol-3-yl)propanoate

<sup>13</sup>C NMR (151 MHz, CDCl<sub>3</sub>) δ 172.42 (s), 166.96 (s), 136.17 (s), 133.89 (s), 131.71 (s), 128.55 (s), 127.69 (s), 127.09 (s), 122.84 (s), 122.30 (s), 119.74 (s), 118.68 (s), 111.32 (s), 110.06 (s), 53.50 (s), 52.43 (s), 27.69 (s). <sup>13</sup>C NMR (151 MHz, CDCl<sub>3</sub>) δ 172.42 (s), 166.96 (s), 136.17 (s), 133.89 (s), 131.71 (s), 128.55 (s), 127.69 (s), 127.09 (s), 122.84 (s), 122.30 (s), 119.74 (s), 118.68 (s), 111.32 (s), 110.06 (s), 53.50 (s), 52.43 (s), 27.69 (s).

**Table S16** The %ee values of (*S*)-benzamide analyzed by HPLC using a Chiralcel-IA column and mixtures of petroleum and isopropanol (v/v, 60:40) (Specific HPLC plots are listed below. The compound is pure enough for HPLC analysis. The integration time ranges that were used for %ee value calculations are strictly held the same in different measurements.)

| <p>The %ee values of (<i>S</i>)-amide derived from the starting material prepared with a 0.7%ee of L-TME before the Pictet-Spengler reaction using 5.0 g in the first biomimic chiral enrichment experiments</p>                                                                                                                                                                                                                                                                                                                                                                                                                                               | <p>The %ee for (<i>S</i>)-amide derived from the recovered L-TME from the second Pictet-Spengler reaction by <b>using 5.00 g of L-TME</b> as the starting material (after the reactions)</p> |             |                 |                   |               |                   |             |             |   |  |        |         |         |       |       |      |   |  |        |         |         |       |       |      |            |  |  |                 |                 |               |               |  |  |
|----------------------------------------------------------------------------------------------------------------------------------------------------------------------------------------------------------------------------------------------------------------------------------------------------------------------------------------------------------------------------------------------------------------------------------------------------------------------------------------------------------------------------------------------------------------------------------------------------------------------------------------------------------------|----------------------------------------------------------------------------------------------------------------------------------------------------------------------------------------------|-------------|-----------------|-------------------|---------------|-------------------|-------------|-------------|---|--|--------|---------|---------|-------|-------|------|---|--|--------|---------|---------|-------|-------|------|------------|--|--|-----------------|-----------------|---------------|---------------|--|--|
| 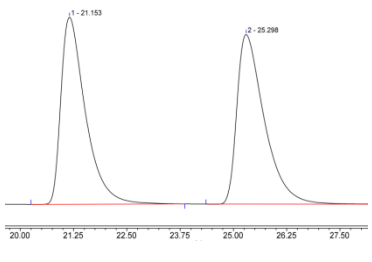                                                                                                                                                                                                                                                                                                                                                                                                                                                                                                                                                                              |                                                                                                            |             |                 |                   |               |                   |             |             |   |  |        |         |         |       |       |      |   |  |        |         |         |       |       |      |            |  |  |                 |                 |               |               |  |  |
| <table border="1"> <thead> <tr> <th>Entry</th> <th>Retention Time</th> <th>Area</th> <th>Height</th> <th>Relative area (%)</th> </tr> </thead> </table>                                                                                                                                                                                                                                                                                                                                                                                                                                                                                                        |                                                                                                                                                                                              | Entry       | Retention Time  | Area              | Height        | Relative area (%) |             |             |   |  |        |         |         |       |       |      |   |  |        |         |         |       |       |      |            |  |  |                 |                 |               |               |  |  |
| Entry                                                                                                                                                                                                                                                                                                                                                                                                                                                                                                                                                                                                                                                          | Retention Time                                                                                                                                                                               | Area        | Height          | Relative area (%) |               |                   |             |             |   |  |        |         |         |       |       |      |   |  |        |         |         |       |       |      |            |  |  |                 |                 |               |               |  |  |
| <p><b>积分结果</b></p>                                                                                                                                                                                                                                                                                                                                                                                                                                                                                                                                                                                                                                             |                                                                                                                                                                                              |             |                 |                   |               |                   |             |             |   |  |        |         |         |       |       |      |   |  |        |         |         |       |       |      |            |  |  |                 |                 |               |               |  |  |
| <table border="1"> <thead> <tr> <th>序号</th> <th>峰名称</th> <th>保留时间<br/>min</th> <th>峰面积<br/>mAU*min</th> <th>峰高<br/>mAU</th> <th>相对峰面积<br/>%</th> <th>相对峰高<br/>%</th> <th>样品量<br/>n.a.</th> </tr> </thead> <tbody> <tr> <td>1</td> <td></td> <td>21.153</td> <td>576.803</td> <td>865.172</td> <td>49.64</td> <td>52.43</td> <td>n.a.</td> </tr> <tr> <td>2</td> <td></td> <td>25.298</td> <td>585.270</td> <td>784.849</td> <td>50.36</td> <td>47.57</td> <td>n.a.</td> </tr> <tr> <td colspan="2"><b>总和:</b></td> <td></td> <td><b>1162.074</b></td> <td><b>1650.021</b></td> <td><b>100.00</b></td> <td><b>100.00</b></td> <td></td> </tr> </tbody> </table> | 序号                                                                                                                                                                                           | 峰名称         | 保留时间<br>min     | 峰面积<br>mAU*min    | 峰高<br>mAU     | 相对峰面积<br>%        | 相对峰高<br>%   | 样品量<br>n.a. | 1 |  | 21.153 | 576.803 | 865.172 | 49.64 | 52.43 | n.a. | 2 |  | 25.298 | 585.270 | 784.849 | 50.36 | 47.57 | n.a. | <b>总和:</b> |  |  | <b>1162.074</b> | <b>1650.021</b> | <b>100.00</b> | <b>100.00</b> |  |  |
| 序号                                                                                                                                                                                                                                                                                                                                                                                                                                                                                                                                                                                                                                                             | 峰名称                                                                                                                                                                                          | 保留时间<br>min | 峰面积<br>mAU*min  | 峰高<br>mAU         | 相对峰面积<br>%    | 相对峰高<br>%         | 样品量<br>n.a. |             |   |  |        |         |         |       |       |      |   |  |        |         |         |       |       |      |            |  |  |                 |                 |               |               |  |  |
| 1                                                                                                                                                                                                                                                                                                                                                                                                                                                                                                                                                                                                                                                              |                                                                                                                                                                                              | 21.153      | 576.803         | 865.172           | 49.64         | 52.43             | n.a.        |             |   |  |        |         |         |       |       |      |   |  |        |         |         |       |       |      |            |  |  |                 |                 |               |               |  |  |
| 2                                                                                                                                                                                                                                                                                                                                                                                                                                                                                                                                                                                                                                                              |                                                                                                                                                                                              | 25.298      | 585.270         | 784.849           | 50.36         | 47.57             | n.a.        |             |   |  |        |         |         |       |       |      |   |  |        |         |         |       |       |      |            |  |  |                 |                 |               |               |  |  |
| <b>总和:</b>                                                                                                                                                                                                                                                                                                                                                                                                                                                                                                                                                                                                                                                     |                                                                                                                                                                                              |             | <b>1162.074</b> | <b>1650.021</b>   | <b>100.00</b> | <b>100.00</b>     |             |             |   |  |        |         |         |       |       |      |   |  |        |         |         |       |       |      |            |  |  |                 |                 |               |               |  |  |
| <p>%ee<sub>1</sub> = 0.7%</p>                                                                                                                                                                                                                                                                                                                                                                                                                                                                                                                                                                                                                                  |                                                                                                                                                                                              |             |                 |                   |               |                   |             |             |   |  |        |         |         |       |       |      |   |  |        |         |         |       |       |      |            |  |  |                 |                 |               |               |  |  |
| <table border="1"> <thead> <tr> <th>Entry</th> <th>Retention Time</th> <th>Area</th> <th>Height</th> <th>Relative area (%)</th> </tr> </thead> </table>                                                                                                                                                                                                                                                                                                                                                                                                                                                                                                        |                                                                                                                                                                                              | Entry       | Retention Time  | Area              | Height        | Relative area (%) |             |             |   |  |        |         |         |       |       |      |   |  |        |         |         |       |       |      |            |  |  |                 |                 |               |               |  |  |
| Entry                                                                                                                                                                                                                                                                                                                                                                                                                                                                                                                                                                                                                                                          | Retention Time                                                                                                                                                                               | Area        | Height          | Relative area (%) |               |                   |             |             |   |  |        |         |         |       |       |      |   |  |        |         |         |       |       |      |            |  |  |                 |                 |               |               |  |  |
| <p><b>积分结果</b></p>                                                                                                                                                                                                                                                                                                                                                                                                                                                                                                                                                                                                                                             |                                                                                                                                                                                              |             |                 |                   |               |                   |             |             |   |  |        |         |         |       |       |      |   |  |        |         |         |       |       |      |            |  |  |                 |                 |               |               |  |  |
| <table border="1"> <thead> <tr> <th>序号</th> <th>峰名称</th> <th>保留时间<br/>min</th> <th>峰面积<br/>mAU*min</th> <th>峰高<br/>mAU</th> <th>相对峰面积<br/>%</th> <th>相对峰高<br/>%</th> <th>样品量<br/>n.a.</th> </tr> </thead> <tbody> <tr> <td>1</td> <td></td> <td>19.500</td> <td>319.148</td> <td>493.189</td> <td>48.65</td> <td>50.94</td> <td>n.a.</td> </tr> <tr> <td>2</td> <td></td> <td>23.665</td> <td>336.903</td> <td>474.953</td> <td>51.35</td> <td>49.06</td> <td>n.a.</td> </tr> <tr> <td colspan="2"><b>总和:</b></td> <td></td> <td><b>656.050</b></td> <td><b>968.141</b></td> <td><b>100.00</b></td> <td><b>100.00</b></td> <td></td> </tr> </tbody> </table>   | 序号                                                                                                                                                                                           | 峰名称         | 保留时间<br>min     | 峰面积<br>mAU*min    | 峰高<br>mAU     | 相对峰面积<br>%        | 相对峰高<br>%   | 样品量<br>n.a. | 1 |  | 19.500 | 319.148 | 493.189 | 48.65 | 50.94 | n.a. | 2 |  | 23.665 | 336.903 | 474.953 | 51.35 | 49.06 | n.a. | <b>总和:</b> |  |  | <b>656.050</b>  | <b>968.141</b>  | <b>100.00</b> | <b>100.00</b> |  |  |
| 序号                                                                                                                                                                                                                                                                                                                                                                                                                                                                                                                                                                                                                                                             | 峰名称                                                                                                                                                                                          | 保留时间<br>min | 峰面积<br>mAU*min  | 峰高<br>mAU         | 相对峰面积<br>%    | 相对峰高<br>%         | 样品量<br>n.a. |             |   |  |        |         |         |       |       |      |   |  |        |         |         |       |       |      |            |  |  |                 |                 |               |               |  |  |
| 1                                                                                                                                                                                                                                                                                                                                                                                                                                                                                                                                                                                                                                                              |                                                                                                                                                                                              | 19.500      | 319.148         | 493.189           | 48.65         | 50.94             | n.a.        |             |   |  |        |         |         |       |       |      |   |  |        |         |         |       |       |      |            |  |  |                 |                 |               |               |  |  |
| 2                                                                                                                                                                                                                                                                                                                                                                                                                                                                                                                                                                                                                                                              |                                                                                                                                                                                              | 23.665      | 336.903         | 474.953           | 51.35         | 49.06             | n.a.        |             |   |  |        |         |         |       |       |      |   |  |        |         |         |       |       |      |            |  |  |                 |                 |               |               |  |  |
| <b>总和:</b>                                                                                                                                                                                                                                                                                                                                                                                                                                                                                                                                                                                                                                                     |                                                                                                                                                                                              |             | <b>656.050</b>  | <b>968.141</b>    | <b>100.00</b> | <b>100.00</b>     |             |             |   |  |        |         |         |       |       |      |   |  |        |         |         |       |       |      |            |  |  |                 |                 |               |               |  |  |
| <p>%ee<sub>2</sub> = 2.7%</p>                                                                                                                                                                                                                                                                                                                                                                                                                                                                                                                                                                                                                                  |                                                                                                                                                                                              |             |                 |                   |               |                   |             |             |   |  |        |         |         |       |       |      |   |  |        |         |         |       |       |      |            |  |  |                 |                 |               |               |  |  |

The second time to do the amplification experiment

| 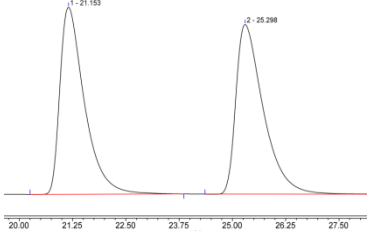 <p><math>\%ee_1 = 0.7\%</math></p> |                | <p>The <math>\%ee</math> for (<i>S</i>)-amide derived from the recovered L-TME from the second condensation reaction <b>using 11.50 g of L-TME</b></p>  <p><math>\%ee_2 = 3.3\%</math></p> |                |                   |               |               |             |
|----------------------------------------------------------------------------------------------------------------------|----------------|------------------------------------------------------------------------------------------------------------------------------------------------------------------------------------------------------------------------------------------------------------------------------|----------------|-------------------|---------------|---------------|-------------|
| Entry                                                                                                                | Retention Time | Area                                                                                                                                                                                                                                                                         | Height         | Relative area (%) |               |               |             |
| <b>积分结果</b>                                                                                                          |                |                                                                                                                                                                                                                                                                              |                |                   |               |               |             |
| 序号                                                                                                                   | 峰名称            | 保留时间<br>min                                                                                                                                                                                                                                                                  | 峰面积<br>mAU*min | 峰高<br>mAU         | 相对峰面积<br>%    | 相对峰高<br>%     | 样品量<br>n.a. |
| 1                                                                                                                    |                | 19.478                                                                                                                                                                                                                                                                       | 407.053        | 621.259           | 48.36         | 50.90         | n.a.        |
| 2                                                                                                                    |                | 23.630                                                                                                                                                                                                                                                                       | 434.647        | 599.211           | 51.64         | 49.10         | n.a.        |
| <b>总和:</b>                                                                                                           |                |                                                                                                                                                                                                                                                                              | <b>841.700</b> | <b>1220.470</b>   | <b>100.00</b> | <b>100.00</b> |             |
| $\%ee_2 = 3.3\%$                                                                                                     |                |                                                                                                                                                                                                                                                                              |                |                   |               |               |             |

### Item 10. The specific optical rotations for different L-TME samples

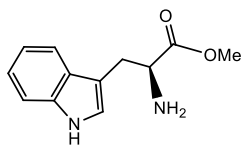

- A. Optically pure L-TME with 99%ee had a specific optical rotation of +18.0 in chloroform.
- B. L-TME prepared as 0.8%ee was measured in chloroform. Its OR was +0.157 with a concentration of 126.7 mg/ml. This is the smallest concentration that can be used to record  $\alpha$  values for specific optical rotation calculation. The corresponding %ee<sub>1</sub> is 0.87% (near 0.9%). The  $\alpha$  value cannot be recorded for concentrations lower than this.
- C. After two Pictet-Spengler reactions, the recovered L-TME had an optical rotation  $[\alpha]_D$  of 0.58 using a concentration of 34 mg/ml. This is also the smallest concentration to record  $\alpha$  values for the specific optical rotation calculation. The corresponding %ee<sub>1</sub> is 3.2%. A higher concentration (76.5 mg/ml) gave a specific optical rotation of 0.65. This corresponds to a %ee<sub>1</sub> of 3.5%.

### The specific optical rotation values ( $[\alpha]_D$ ) of (*S*)-benzamide derived from L-TME

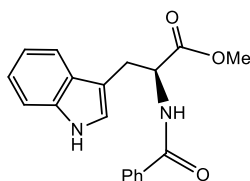

- A. Optically pure (*S*)-benzamide from L-TME with a >99%ee has an OR value of 80.2 in chloroform.
- B. The OR value of (*S*)-benzamide derived from L-TME that was prepared as the starting material with an 0.8%ee: the first time,  $[\alpha]_D = 0.88$ , concentration is 50.2 mg/ml. Its corresponding %ee is 1.1%; the second measured  $[\alpha]_D = 0.84$ , the concentration was 19 mg/ml. Its corresponding %ee is 1.05%.
- C. The OR value of (*S*)-benzamide derived from L-TME (5.0 g) that was recovered from the second Pictet-Spengler reaction. The  $[\alpha]_D$  value was +2.65 with a concentration of 8 mg/ml. Its corresponding %ee is 3.3%.
- D. The OR value of (*S*)-benzamide derived from L-TME (11.50 g) that was recovered from the second Pictet-Spengler reaction. The  $[\alpha]_D$  value was +2.38 with a concentration of 6 mg/ml. Its corresponding %ee is 2.96%ee, which is near 3.0%ee and this value is used in the paper.

### Item 11. The energy for the compounds 5 and 6 at the B3LYP/6-31G(d) level

The products formed in the reactions have six stereogenic centers. Thus, it has 64 enantiomers ( $2^6$ ). Theoretically, half of 64 enantiomers need to be investigated for their relative energy study.

Optimizations for all 32 compounds were performed at the B3LYP/6-31G(d) level in the gas phase first. The energy data in au and their relative energy values in kcal/mol are listed below the corresponding geometries. It could be found that compound DL-4 had the lowest energy among all the 32 compounds. LL-9 had the lowest energy in series of 16 compounds named as LL-1 to LL-16. All the compounds with relative energy from 0 to 4.0 kcal/mol were further used in optimizations again at the higher level, such as using 6-311+G(d) and 6-311++G(2d,p) level in the gas phase and in liquid, respectively. These compounds have the names of DL-4, DL-6, DL-9, DL-11, DL-13, LL-4, LL-6, LL-9. The specific data are illustrated in the corresponding sections below.

Table S17 The total 32 enantiomers optimized at the B3LYP/6-31G(d) level in the gas phase and their energy values

|                                                                                     |                                                                                     |                                                                                      |                                                                                              |
|-------------------------------------------------------------------------------------|-------------------------------------------------------------------------------------|--------------------------------------------------------------------------------------|----------------------------------------------------------------------------------------------|
| 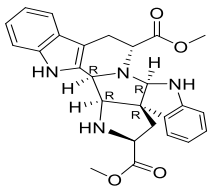  |   |   |          |
| DL-1<br>E=-1526.300328 (au)<br>$\Delta E=25.367$ kcal/mol                           | DL-2<br>E=-1526.305275 (au)<br>$\Delta E=22.264$ kcal/mol                           | DL-3<br>E=-1526.225389 (au)<br>$\Delta E=72.392$ kcal/mol                            | DL-4( <i>R,S</i> )-5( <i>I</i> ) in text<br>E=-1526.340755 (au)<br>$\Delta E=0.000$ kcal/mol |
|  |  |  |         |
| DL-5<br>E=-1526.226604 (au)<br>$\Delta E=71.629$ kcal/mol                           | DL-6<br>E=-1526.339501 (au)<br>$\Delta E=0.786$ kcal/mol                            | DL-7<br>E=-1526.304280 (au)<br>$\Delta E=22.888$ kcal/mol                            | DL-8<br>E=-1526.316202 (au)<br>$\Delta E=15.407$ kcal/mol                                    |
|  |  |  |         |
| DL-9<br>E=-1526.340172 (au)<br>$\Delta E=0.365$ kcal/mol                            | DL-10<br>E=-1526.221978 (au)<br>$\Delta E=74.532$ kcal/mol                          | DL-11<br>E=-1526.337495 (au)<br>$\Delta E=2.045$ kcal/mol                            | DL-12<br>E=-1526.228845 (au)<br>$\Delta E=70.223$ kcal/mol                                   |

Table S17 continued

|                                                                                     |                                                                                     |                                                                                      |                                                                                       |
|-------------------------------------------------------------------------------------|-------------------------------------------------------------------------------------|--------------------------------------------------------------------------------------|---------------------------------------------------------------------------------------|
| 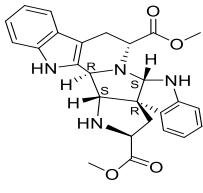   |    |    |    |
| DL-13<br>E=-1526.337496 (au)<br>$\Delta E=1.803$                                    | DL-14<br>E=-1526.228846 (au)<br>$\Delta E=69.981$                                   | DL-15<br>E=-1526.312960 (au)<br>$\Delta E=17.120$                                    | DL-16<br>E=-1526.307145 (au)<br>$\Delta E=20.849$                                     |
|    |    |    |    |
| LL-1<br>E=-1526.301140 (au)<br>$\Delta E=24.859$ kcal/mol                           | LL-2<br>E=-1526.307755 (au)<br>$\Delta E=20.707$ kcal/mol                           | LL-3<br>E=-1526.226303 (au)<br>$\Delta E=71.818$ kcal/mol                            | LL-4<br>E=-1526.338153 (au)<br>$\Delta E=1.632$ kcal/mol                              |
|  |  |  |  |
| LL-5<br>E=-1526.222192 (au)<br>$\Delta E=74.398$ kcal/mol                           | LL-6<br>E=-1526.338075 (au)<br>$\Delta E=1.681$ kcal/mol                            | LL-7<br>E=-1526.305053 (au)<br>$\Delta E=22.403$ kcal/mol                            | LL-8<br>E=-1526.317506 (au)<br>$\Delta E=14.588$ kcal/mol                             |
|  |  |  |  |
| LL-9<br>E=-1526.340370 (au)<br>$\Delta E=0.241$ kcal/mol                            | LL-10<br>E=-1526.225784 (au)<br>$\Delta E=72.144$ kcal/mol                          | LL-11<br>E=-1526.333614 (au)<br>$\Delta E=4.480$ kcal/mol                            | LL-12<br>E=-1526.228257 (au)<br>$\Delta E=70.592$ kcal/mol                            |

Table S17 continued

|                                                                                   |                                                                                   |                                                                                    |                                                                                     |
|-----------------------------------------------------------------------------------|-----------------------------------------------------------------------------------|------------------------------------------------------------------------------------|-------------------------------------------------------------------------------------|
| 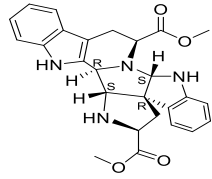 |  |  |  |
| LL-13<br>E=-1526.315686 (au)<br>$\Delta E=15.730$ kcal/mol                        | LL-14<br>E=-1526.310696 (au)<br>$\Delta E=18.862$ kcal/mol                        | LL-15<br>E=-1526.309895 (au)<br>$\Delta E=19.365$ kcal/mol                         | LL-16<br>E=-1526.306535 (au)<br>$\Delta E=21.473$ kcal/mol                          |

*Note: The numbers of these compounds are not the numbers which appeared in Text. The compound numbers used in the published text are listed behind the specific numbers of the compounds used in the SM, and labeled in red for clarity. For example, DL-4, DL-9 and LL-6 are the compound numbers for the series of compounds used here for energy investigations. They correspond to the compound numbers (R,S)-5(1), (R,S)-5(2), and (S,S)-6(1) used in the text.*

## Item 12 Computations of six isomers of 5 and 6: Energies, coordinates at three different quantum levels

All B3LYP/6-31G(d)-optimized geometries with relative energy from 0-4 kcal/mol were optimized at the B3LYP/6-311+G(d) level in the gas phase first. DL-11 and DL-13 were not computed furthermore in higher levels since its relative energy is over 4.0 kcal/mol that means its Boltzmann fraction is small. Then, these compounds named as DL-4, DL-6, DL-9 LL-4, L,L-6 and LL-9 were used in further calculations at the levels of B3LYP/6-311++G(2d,p) in the gas phase and in solution (CH<sub>2</sub>Cl<sub>2</sub>) using PCM model. The lowest energy compound is DL-4. LL-6 had the second lowest energy. The specific data are listed below the corresponding geometries.

The data of E<sub>1</sub>, ΔE<sub>1</sub> were obtained at the B3LYP/6-311+G(d) level in the gas phase

The data of E<sub>2</sub>, ΔE<sub>2</sub> were obtained at the B3LYP/6-311++G(2d,p) level in the gas phase

The data of E<sub>3</sub>, ΔE<sub>3</sub> were obtained at the B3LYP/6-311++G(2d,p) level in CH<sub>2</sub>Cl<sub>2</sub> using PCM model.

Energy unit of E is in a.u.

Delat E unit is in kcal/mol.

Table S18 The predicted energy for the eight compounds

|                                                                                                                                                                                                         |                                                                                                                                                                                    |                                                                                                                                                                                                         |
|---------------------------------------------------------------------------------------------------------------------------------------------------------------------------------------------------------|------------------------------------------------------------------------------------------------------------------------------------------------------------------------------------|---------------------------------------------------------------------------------------------------------------------------------------------------------------------------------------------------------|
| 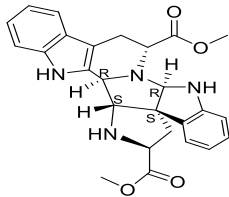                                                                                                                      |                                                                                                  |                                                                                                                      |
| DL-4((R,S)-3(I) in paper)<br>E <sub>1</sub> =-1526.710662<br>ΔE <sub>1</sub> =0.000<br>E <sub>2</sub> =-1526.788189<br>ΔE <sub>2</sub> =0.000<br>E <sub>3</sub> =-1526.804445<br>ΔE <sub>3</sub> =0.000 | DL-6<br>E <sub>1</sub> =-1526.708812<br>ΔE <sub>1</sub> =1.160<br>E <sub>2</sub> =-1526.786158<br>ΔE <sub>2</sub> =1.274<br>E <sub>3</sub> =-1526.801796<br>ΔE <sub>3</sub> =1.662 | DL-9((R,S)-3(2) in paper)<br>E <sub>1</sub> =-1526.708990<br>ΔE <sub>1</sub> =1.049<br>E <sub>2</sub> =-1526.785996<br>ΔE <sub>2</sub> =1.376<br>E <sub>3</sub> =-1526.802090<br>ΔE <sub>3</sub> =1.478 |
|                                                                                                                      |                                                                                                 |                                                                                                                                                                                                         |
| DL-11<br>E <sub>1</sub> =-1526.704542<br>ΔE <sub>1</sub> =3.839<br>The relative energy is too big, further computation was not performed                                                                | DL-13<br>E <sub>1</sub> =-1526.687444<br>ΔE <sub>1</sub> =14.568<br>The relative energy is too big, further computation was not performed                                          |                                                                                                                                                                                                         |

Table S18 continued

|                                                                                                                                                                                                                                                       |                                                                                                                                                                                                                                                                                               |                                                                                                                                                                                                                                                       |
|-------------------------------------------------------------------------------------------------------------------------------------------------------------------------------------------------------------------------------------------------------|-----------------------------------------------------------------------------------------------------------------------------------------------------------------------------------------------------------------------------------------------------------------------------------------------|-------------------------------------------------------------------------------------------------------------------------------------------------------------------------------------------------------------------------------------------------------|
| 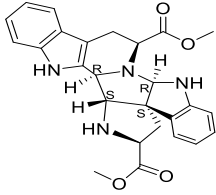                                                                                                                                                                     |                                                                                                                                                                                                              |                                                                                                                                                                     |
| <p>LL-4</p> <p><math>E_1 = -1526.707144</math></p> <p><math>\Delta E_1 = 2.206</math></p> <p><math>E_2 = -1526.784365</math></p> <p><math>\Delta E_2 = 2.399</math></p> <p><math>E_3 = -1526.800037</math></p> <p><math>\Delta E_3 = 2.766</math></p> | <p>LL-6 ((<i>S,S</i>)-4(<i>I</i>) in<br/>paper)</p> <p><math>E_1 = -1526.706464</math></p> <p><math>\Delta E_1 = 2.633</math></p> <p><math>E_2 = -1526.785940</math></p> <p><math>\Delta E_2 = 1.411</math></p> <p><math>E_3 = -1526.802362</math></p> <p><math>\Delta E_3 = 1.307</math></p> | <p>LL-9</p> <p><math>E_1 = -1526.708010</math></p> <p><math>\Delta E_1 = 1.664</math></p> <p><math>E_2 = -1526.784668</math></p> <p><math>\Delta E_2 = 2.209</math></p> <p><math>E_3 = -1526.800011</math></p> <p><math>\Delta E_3 = 2.782</math></p> |

**Coordinates for the four low energy compounds (5(I), 5(2) and 6(I)) at the B3LYP/6-311++G(2d,p) level in CH<sub>2</sub>Cl<sub>2</sub> using PCM.**

Table S19 coordinate for (R,S)-5(I) in text (=DL-4 in the Table S18 )

Standard orientation:

| Center Number | Atomic Number | Atomic Type | Coordinates (Angstroms) |           |           |
|---------------|---------------|-------------|-------------------------|-----------|-----------|
|               |               |             | X                       | Y         | Z         |
| 1             | 6             | 0           | -4.130830               | 2.772989  | -1.928590 |
| 2             | 6             | 0           | -3.333208               | 1.802383  | -1.327947 |
| 3             | 6             | 0           | -3.835123               | 0.516465  | -0.987206 |
| 4             | 6             | 0           | -5.175571               | 0.219063  | -1.265459 |
| 5             | 6             | 0           | -5.971244               | 1.184670  | -1.861449 |
| 6             | 6             | 0           | -5.454190               | 2.448677  | -2.189743 |
| 7             | 6             | 0           | -2.745626               | -0.209296 | -0.393310 |
| 8             | 6             | 0           | -1.663378               | 0.624160  | -0.405329 |
| 9             | 7             | 0           | -2.003047               | 1.839979  | -0.957687 |
| 10            | 1             | 0           | -1.374955               | 2.621855  | -1.048824 |
| 11            | 6             | 0           | -2.675177               | -1.600540 | 0.161466  |
| 12            | 6             | 0           | -1.430826               | -1.752176 | 1.077147  |
| 13            | 6             | 0           | -1.681704               | -1.233944 | 2.505389  |
| 14            | 8             | 0           | -2.755950               | -1.826754 | 3.060022  |
| 15            | 6             | 0           | -3.064834               | -1.432484 | 4.411250  |
| 16            | 7             | 0           | -0.285403               | -1.152410 | 0.425776  |
| 17            | 6             | 0           | -0.338500               | 0.286453  | 0.171672  |
| 18            | 6             | 0           | 0.915972                | 0.512047  | -0.691442 |
| 19            | 1             | 0           | -3.574509               | -1.853284 | 0.725568  |
| 20            | 1             | 0           | -2.585234               | -2.335632 | -0.645159 |
| 21            | 1             | 0           | -1.239725               | -2.824693 | 1.189455  |
| 22            | 1             | 0           | -3.944524               | -2.007725 | 4.687361  |
| 23            | 1             | 0           | -2.230234               | -1.661847 | 5.073046  |
| 24            | 1             | 0           | -3.274795               | -0.364405 | 4.453598  |
| 25            | 6             | 0           | 1.084971                | -1.433491 | 0.862180  |
| 26            | 6             | 0           | 1.929648                | -0.550178 | -0.122433 |
| 27            | 6             | 0           | 3.043185                | 0.311495  | 0.517016  |
| 28            | 6             | 0           | 2.439353                | 1.744248  | 0.598965  |
| 29            | 6             | 0           | 3.508386                | 2.807625  | 0.476074  |
| 30            | 7             | 0           | 1.481209                | 1.848007  | -0.506273 |
| 31            | 1             | 0           | 1.987343                | 2.149990  | -1.334049 |
| 32            | 8             | 0           | 3.844745                | 3.319274  | -0.564464 |
| 33            | 8             | 0           | 4.070407                | 3.081848  | 1.664129  |
| 34            | 6             | 0           | 5.152381                | 4.033552  | 1.641459  |
| 35            | 1             | 0           | 4.801802                | 4.993783  | 1.265113  |

|    |   |   |           |           |           |
|----|---|---|-----------|-----------|-----------|
| 36 | 1 | 0 | 5.481493  | 4.121672  | 2.673237  |
| 37 | 1 | 0 | 5.961459  | 3.671781  | 1.007806  |
| 38 | 1 | 0 | 3.915781  | 0.320000  | -0.139324 |
| 39 | 1 | 0 | 3.361786  | -0.064014 | 1.489823  |
| 40 | 1 | 0 | 1.926706  | 1.876450  | 1.554029  |
| 41 | 7 | 0 | 1.531568  | -2.798589 | 0.617567  |
| 42 | 6 | 0 | 2.425625  | -1.581888 | -1.111859 |
| 43 | 6 | 0 | 3.089536  | -1.418644 | -2.315545 |
| 44 | 6 | 0 | 2.120174  | -2.864752 | -0.648397 |
| 45 | 6 | 0 | 3.435161  | -2.544252 | -3.067878 |
| 46 | 1 | 0 | 3.337661  | -0.427801 | -2.682185 |
| 47 | 6 | 0 | 2.453809  | -3.994269 | -1.387291 |
| 48 | 6 | 0 | 3.113490  | -3.816661 | -2.602840 |
| 49 | 1 | 0 | 3.949882  | -2.426478 | -4.013237 |
| 50 | 1 | 0 | 2.214306  | -4.988762 | -1.028427 |
| 51 | 1 | 0 | 3.380375  | -4.686039 | -3.192324 |
| 52 | 1 | 0 | 0.921739  | -3.551679 | 0.900495  |
| 53 | 1 | 0 | 1.239141  | -1.171977 | 1.915046  |
| 54 | 1 | 0 | -3.734691 | 3.749145  | -2.184130 |
| 55 | 1 | 0 | -6.099677 | 3.183527  | -2.655619 |
| 56 | 1 | 0 | -7.009106 | 0.964129  | -2.080958 |
| 57 | 1 | 0 | -5.586829 | -0.753711 | -1.020608 |
| 58 | 8 | 0 | -0.989935 | -0.435075 | 3.087887  |
| 59 | 1 | 0 | -0.204474 | 0.866239  | 1.100205  |
| 60 | 1 | 0 | 0.685958  | 0.338711  | -1.741600 |

Table S20 coordinate for (R,S)-5(2) in text (=DL-9 in Table S18)

Standard orientation:

| Center<br>Number | Atomic<br>Number | Atomic<br>Type | Coordinates (Angstroms) |           |           |
|------------------|------------------|----------------|-------------------------|-----------|-----------|
|                  |                  |                | X                       | Y         | Z         |
| 1                | 6                | 0              | -4.601272               | 1.366254  | 2.159915  |
| 2                | 6                | 0              | -3.607662               | 0.784033  | 1.377954  |
| 3                | 6                | 0              | -3.864673               | 0.301830  | 0.068401  |
| 4                | 6                | 0              | -5.164765               | 0.391535  | -0.444443 |
| 5                | 6                | 0              | -6.157681               | 0.963967  | 0.335052  |
| 6                | 6                | 0              | -5.877592               | 1.450624  | 1.622141  |
| 7                | 6                | 0              | -2.615302               | -0.194724 | -0.442036 |
| 8                | 6                | 0              | -1.683460               | -0.002573 | 0.534503  |
| 9                | 7                | 0              | -2.272733               | 0.548923  | 1.658490  |
| 10               | 1                | 0              | -1.755900               | 1.022854  | 2.381730  |

|    |   |   |           |           |           |
|----|---|---|-----------|-----------|-----------|
| 11 | 6 | 0 | -2.298343 | -0.815501 | -1.767481 |
| 12 | 6 | 0 | -0.894250 | -1.468660 | -1.790855 |
| 13 | 6 | 0 | -0.911905 | -2.965723 | -1.439234 |
| 14 | 8 | 0 | -1.578237 | -3.229862 | -0.305532 |
| 15 | 6 | 0 | -1.602779 | -4.610240 | 0.106793  |
| 16 | 7 | 0 | 0.037246  | -0.691990 | -0.981990 |
| 17 | 6 | 0 | -0.269785 | -0.459005 | 0.434826  |
| 18 | 6 | 0 | 0.858212  | 0.501485  | 0.850207  |
| 19 | 1 | 0 | -3.049777 | -1.563171 | -2.039835 |
| 20 | 1 | 0 | -2.325005 | -0.052763 | -2.553099 |
| 21 | 1 | 0 | -0.513929 | -1.447850 | -2.813707 |
| 22 | 1 | 0 | -2.192626 | -4.628996 | 1.019239  |
| 23 | 1 | 0 | -2.063849 | -5.226909 | -0.663868 |
| 24 | 1 | 0 | -0.589821 | -4.964818 | 0.294468  |
| 25 | 6 | 0 | 1.456976  | -0.922102 | -1.088161 |
| 26 | 6 | 0 | 2.081403  | 0.099448  | -0.081191 |
| 27 | 6 | 0 | 2.517141  | 1.444180  | -0.703080 |
| 28 | 6 | 0 | 1.816952  | 2.517969  | 0.174895  |
| 29 | 6 | 0 | 1.566283  | 3.798314  | -0.591784 |
| 30 | 7 | 0 | 0.561044  | 1.914715  | 0.613277  |
| 31 | 1 | 0 | -0.116781 | 2.013556  | -0.140698 |
| 32 | 8 | 0 | 0.580361  | 4.018774  | -1.249978 |
| 33 | 8 | 0 | 2.604658  | 4.646612  | -0.485012 |
| 34 | 6 | 0 | 2.490916  | 5.870677  | -1.236661 |
| 35 | 1 | 0 | 3.407060  | 6.419728  | -1.036403 |
| 36 | 1 | 0 | 2.395225  | 5.654927  | -2.300359 |
| 37 | 1 | 0 | 1.621431  | 6.437081  | -0.905275 |
| 38 | 1 | 0 | 2.137906  | 1.521710  | -1.725057 |
| 39 | 1 | 0 | 3.600573  | 1.559575  | -0.732457 |
| 40 | 1 | 0 | 2.438863  | 2.748691  | 1.043680  |
| 41 | 7 | 0 | 1.939606  | -2.238047 | -0.611145 |
| 42 | 6 | 0 | 3.156133  | -0.707228 | 0.603190  |
| 43 | 6 | 0 | 4.149621  | -0.317383 | 1.485625  |
| 44 | 6 | 0 | 3.033284  | -2.052255 | 0.233014  |
| 45 | 6 | 0 | 5.035421  | -1.272473 | 1.990789  |
| 46 | 1 | 0 | 4.253947  | 0.722116  | 1.778497  |
| 47 | 6 | 0 | 3.911606  | -3.013185 | 0.725978  |
| 48 | 6 | 0 | 4.912638  | -2.605206 | 1.606029  |
| 49 | 1 | 0 | 5.820079  | -0.975616 | 2.675370  |
| 50 | 1 | 0 | 3.820985  | -4.053121 | 0.434307  |
| 51 | 1 | 0 | 5.606753  | -3.341013 | 1.995198  |
| 52 | 1 | 0 | 1.978684  | -2.983890 | -1.292096 |
| 53 | 1 | 0 | 1.768509  | -0.758218 | -2.124778 |
| 54 | 1 | 0 | -4.390066 | 1.736659  | 3.156551  |

|    |   |   |           |           |           |
|----|---|---|-----------|-----------|-----------|
| 55 | 1 | 0 | -6.672579 | 1.896957  | 2.207364  |
| 56 | 1 | 0 | -7.166458 | 1.041586  | -0.052517 |
| 57 | 1 | 0 | -5.393046 | 0.025332  | -1.438967 |
| 58 | 8 | 0 | -0.366576 | -3.813546 | -2.108320 |
| 59 | 1 | 0 | -0.150166 | -1.379404 | 1.027986  |
| 60 | 1 | 0 | 1.129490  | 0.359612  | 1.898716  |

Table S21 coordinate for (S,S)-**6(I)** in text (=LL-6 in Table S18)

Standard orientation:

| Center<br>Number | Atomic<br>Number | Atomic<br>Type | Coordinates (Angstroms) |           |           |
|------------------|------------------|----------------|-------------------------|-----------|-----------|
|                  |                  |                | X                       | Y         | Z         |
| 1                | 6                | 0              | -4.395942               | 1.893793  | -0.897558 |
| 2                | 6                | 0              | -3.358033               | 1.005575  | -0.624994 |
| 3                | 6                | 0              | -3.437964               | 0.054619  | 0.426680  |
| 4                | 6                | 0              | -4.605074               | -0.007588 | 1.198816  |
| 5                | 6                | 0              | -5.640965               | 0.871641  | 0.924816  |
| 6                | 6                | 0              | -5.535530               | 1.815526  | -0.110274 |
| 7                | 6                | 0              | -2.190291               | -0.659972 | 0.429643  |
| 8                | 6                | 0              | -1.422970               | -0.132171 | -0.574023 |
| 9                | 7                | 0              | -2.134421               | 0.843961  | -1.244718 |
| 10               | 1                | 0              | -1.667808               | 1.522188  | -1.829679 |
| 11               | 6                | 0              | -1.726949               | -1.790007 | 1.292672  |
| 12               | 6                | 0              | -0.505634               | -2.494090 | 0.631409  |
| 13               | 6                | 0              | -0.949328               | -3.549025 | -0.384010 |
| 14               | 8                | 0              | -1.650086               | -4.521905 | 0.236973  |
| 15               | 6                | 0              | -2.142773               | -5.574108 | -0.613270 |
| 16               | 7                | 0              | 0.458859                | -1.575137 | 0.032128  |
| 17               | 6                | 0              | -0.078248               | -0.656631 | -0.990779 |
| 18               | 6                | 0              | 1.063501                | 0.385135  | -1.179914 |
| 19               | 1                | 0              | -1.431244               | -1.430016 | 2.285476  |
| 20               | 1                | 0              | -2.519000               | -2.521722 | 1.464160  |
| 21               | 1                | 0              | 0.015930                | -3.060622 | 1.408701  |
| 22               | 1                | 0              | -1.314524               | -6.084160 | -1.104221 |
| 23               | 1                | 0              | -2.676237               | -6.253990 | 0.045889  |
| 24               | 1                | 0              | -2.812717               | -5.167019 | -1.369940 |
| 25               | 6                | 0              | 1.223419                | -0.778240 | 1.002589  |
| 26               | 6                | 0              | 1.915397                | 0.308625  | 0.133066  |
| 27               | 6                | 0              | 1.868764                | 1.746192  | 0.698475  |
| 28               | 6                | 0              | 0.671337                | 2.407425  | -0.032549 |
| 29               | 6                | 0              | 0.854662                | 3.902519  | -0.173973 |

|    |   |   |           |           |           |
|----|---|---|-----------|-----------|-----------|
| 30 | 7 | 0 | 0.605716  | 1.769005  | -1.351769 |
| 31 | 1 | 0 | 1.220412  | 2.278028  | -1.980157 |
| 32 | 8 | 0 | 1.328478  | 4.442205  | -1.144750 |
| 33 | 8 | 0 | 0.465194  | 4.552538  | 0.933179  |
| 34 | 6 | 0 | 0.663754  | 5.980221  | 0.926399  |
| 35 | 1 | 0 | 1.720233  | 6.214502  | 0.800356  |
| 36 | 1 | 0 | 0.094168  | 6.435725  | 0.117327  |
| 37 | 1 | 0 | 0.304684  | 6.326231  | 1.891703  |
| 38 | 1 | 0 | 2.791068  | 2.268193  | 0.434430  |
| 39 | 1 | 0 | 1.770593  | 1.770633  | 1.784053  |
| 40 | 1 | 0 | -0.253082 | 2.217931  | 0.518364  |
| 41 | 7 | 0 | 2.319630  | -1.511170 | 1.636252  |
| 42 | 6 | 0 | 3.314275  | -0.252944 | -0.009237 |
| 43 | 6 | 0 | 4.364050  | 0.148941  | -0.817299 |
| 44 | 6 | 0 | 3.471618  | -1.334251 | 0.860910  |
| 45 | 6 | 0 | 5.574154  | -0.546935 | -0.765041 |
| 46 | 1 | 0 | 4.254572  | 0.991187  | -1.492913 |
| 47 | 6 | 0 | 4.668679  | -2.038713 | 0.921891  |
| 48 | 6 | 0 | 5.715875  | -1.631888 | 0.096695  |
| 49 | 1 | 0 | 6.399942  | -0.245437 | -1.397231 |
| 50 | 1 | 0 | 4.789123  | -2.880736 | 1.593795  |
| 51 | 1 | 0 | 6.655559  | -2.170825 | 0.129055  |
| 52 | 1 | 0 | 2.114942  | -2.450221 | 1.948509  |
| 53 | 1 | 0 | 0.582762  | -0.347019 | 1.781678  |
| 54 | 1 | 0 | -4.321188 | 2.616858  | -1.701683 |
| 55 | 1 | 0 | -6.360685 | 2.491475  | -0.300203 |
| 56 | 1 | 0 | -6.547540 | 0.834273  | 1.517049  |
| 57 | 1 | 0 | -4.697946 | -0.728376 | 2.003524  |
| 58 | 8 | 0 | -0.716724 | -3.551827 | -1.564146 |
| 59 | 1 | 0 | -0.205241 | -1.215906 | -1.920352 |
| 60 | 1 | 0 | 1.651145  | 0.092239  | -2.047833 |

---

### Item 13. Analysis of %ee values of TME via HPLC

Table S22 The HPLC plots for the %ee<sub>2</sub> of L-TME analysis (L-TME was converted into the corresponding benzamide for this measurement, see details at the end of this Table <sup>a</sup>).

| Before the reaction <sup>b</sup>                                                                                                                                                                                                                                                                                                                                      |           | After the reaction <sup>b</sup>                                                      |                 |                |               |               |             |
|-----------------------------------------------------------------------------------------------------------------------------------------------------------------------------------------------------------------------------------------------------------------------------------------------------------------------------------------------------------------------|-----------|--------------------------------------------------------------------------------------|-----------------|----------------|---------------|---------------|-------------|
| 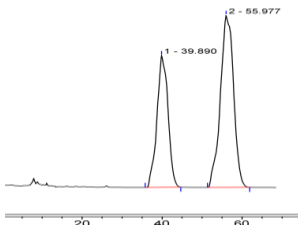                                                                                                                                                                                                                                                                                     |           |    |                 |                |               |               |             |
| A %ee of 21.88% initial used (%ee <sub>1</sub> )                                                                                                                                                                                                                                                                                                                      |           | A %ee of 30.8% was recovered (%ee <sub>2</sub> )                                     |                 |                |               |               |             |
| Signal                                                                                                                                                                                                                                                                                                                                                                | Retention | Area                                                                                 | Height          | Area%          | Height%       |               |             |
| <b>积分结果</b>                                                                                                                                                                                                                                                                                                                                                           |           |                                                                                      |                 |                |               |               |             |
| 序号                                                                                                                                                                                                                                                                                                                                                                    | 峰名称       | 保留时间<br>min                                                                          | 峰面积<br>mAU*min  | 峰高<br>mAU      | 相对峰面积<br>%    | 相对峰高<br>%     | 样品量<br>n.a. |
| 1                                                                                                                                                                                                                                                                                                                                                                     |           | 39.890                                                                               | 728.836         | 227.187        | 39.06         | 43.38         | n.a.        |
| 2                                                                                                                                                                                                                                                                                                                                                                     |           | 55.977                                                                               | 1137.041        | 296.563        | 60.94         | 56.62         | n.a.        |
| <b>总和:</b>                                                                                                                                                                                                                                                                                                                                                            |           |                                                                                      | <b>1865.877</b> | <b>523.750</b> | <b>100.00</b> | <b>100.00</b> |             |
| <b>积分结果</b>                                                                                                                                                                                                                                                                                                                                                           |           |                                                                                      |                 |                |               |               |             |
| 序号                                                                                                                                                                                                                                                                                                                                                                    | 峰名称       | 保留时间<br>min                                                                          | 峰面积<br>mAU*min  | 峰高<br>mAU      | 相对峰面积<br>%    | 相对峰高<br>%     | 样品量<br>n.a. |
| 1                                                                                                                                                                                                                                                                                                                                                                     |           | 38.987                                                                               | 671.215         | 218.788        | 34.60         | 39.15         | n.a.        |
| 2                                                                                                                                                                                                                                                                                                                                                                     |           | 55.198                                                                               | 1268.790        | 340.069        | 65.40         | 60.85         | n.a.        |
| <b>总和:</b>                                                                                                                                                                                                                                                                                                                                                            |           |                                                                                      | <b>1940.005</b> | <b>558.857</b> | <b>100.00</b> | <b>100.00</b> |             |
| Before the reaction                                                                                                                                                                                                                                                                                                                                                   |           | After the reaction                                                                   |                 |                |               |               |             |
|                                                                                                                                                                                                                                                                                    |           |  |                 |                |               |               |             |
| 30.68% (%ee <sub>1</sub> )                                                                                                                                                                                                                                                                                                                                            |           | 38.86% (%ee <sub>2</sub> )                                                           |                 |                |               |               |             |
| Signal                                                                                                                                                                                                                                                                                                                                                                | Retention | Area                                                                                 | Height          | Area%          | Height%       |               |             |
| <b>积分结果</b>                                                                                                                                                                                                                                                                                                                                                           |           |                                                                                      |                 |                |               |               |             |
| 序号                                                                                                                                                                                                                                                                                                                                                                    | 峰名称       | 保留时间<br>min                                                                          | 峰面积<br>mAU*min  | 峰高<br>mAU      | 相对峰面积<br>%    | 相对峰高<br>%     | 样品量<br>n.a. |
| 1                                                                                                                                                                                                                                                                                                                                                                     |           | 40.130                                                                               | 137.043         | 97.114         | 34.66         | 34.96         | n.a.        |
| 2                                                                                                                                                                                                                                                                                                                                                                     |           | 52.438                                                                               | 258.347         | 180.644        | 65.34         | 65.04         | n.a.        |
| <b>总和:</b>                                                                                                                                                                                                                                                                                                                                                            |           |                                                                                      | <b>395.390</b>  | <b>277.758</b> | <b>100.00</b> | <b>100.00</b> |             |
| <b>积分结果</b>                                                                                                                                                                                                                                                                                                                                                           |           |                                                                                      |                 |                |               |               |             |
| 序号                                                                                                                                                                                                                                                                                                                                                                    | 峰名称       | 保留时间<br>min                                                                          | 峰面积<br>mAU*min  | 峰高<br>mAU      | 相对峰面积<br>%    | 相对峰高<br>%     | 样品量<br>n.a. |
| 1                                                                                                                                                                                                                                                                                                                                                                     |           | 43.177                                                                               | 199.557         | 107.919        | 30.57         | 29.93         | n.a.        |
| 2                                                                                                                                                                                                                                                                                                                                                                     |           | 55.947                                                                               | 453.250         | 252.701        | 69.43         | 70.07         | n.a.        |
| <b>总和:</b>                                                                                                                                                                                                                                                                                                                                                            |           |                                                                                      | <b>652.807</b>  | <b>360.619</b> | <b>100.00</b> | <b>100.00</b> |             |
| <sup>a</sup> The reaction equation is illustrated at the end of this Table. <sup>b</sup> “Before the reaction” means the HPLC plot analyzed for %ee <sub>1</sub> of L-TME prepared as the starting material. “After the reaction” means HPLC plot analyzed for the corresponding %ee <sub>2</sub> of the L-TME that was recovered after the Pictet-Spengler reaction. |           |                                                                                      |                 |                |               |               |             |

Table 22 continued

|                                                                                     |           |                                                                                      |                 |                 |               |               |             |
|-------------------------------------------------------------------------------------|-----------|--------------------------------------------------------------------------------------|-----------------|-----------------|---------------|---------------|-------------|
| 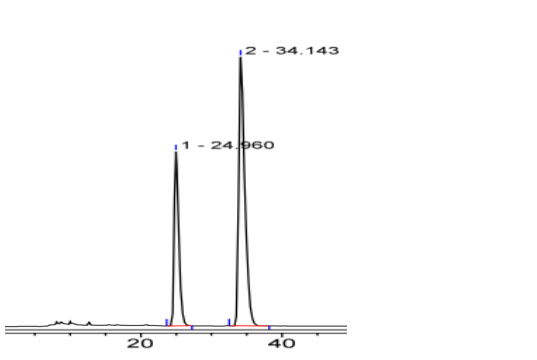   |           |    |                 |                 |               |               |             |
| 35.72% (%ee <sub>1</sub> )                                                          |           | 47.14% (%ee <sub>2</sub> )                                                           |                 |                 |               |               |             |
| Signal                                                                              | Retention | Area                                                                                 | Height          | Area%           | Height%       |               |             |
| <b>积分结果</b>                                                                         |           |                                                                                      |                 |                 |               |               |             |
| 序号                                                                                  | 峰名称       | 保留时间<br>min                                                                          | 峰面积<br>mAU*min  | 峰高<br>mAU       | 相对峰面积<br>%    | 相对峰高<br>%     | 样品量<br>n.a. |
| 1                                                                                   |           | 24.960                                                                               | 372.346         | 510.605         | 32.14         | 39.32         | n.a.        |
| 2                                                                                   |           | 34.143                                                                               | 786.107         | 788.118         | 67.86         | 60.68         | n.a.        |
| <b>总和:</b>                                                                          |           |                                                                                      | <b>1158.454</b> | <b>1298.724</b> | <b>100.00</b> | <b>100.00</b> |             |
| <b>积分结果</b>                                                                         |           |                                                                                      |                 |                 |               |               |             |
| 序号                                                                                  | 峰名称       | 保留时间<br>min                                                                          | 峰面积<br>mAU*min  | 峰高<br>mAU       | 相对峰面积<br>%    | 相对峰高<br>%     | 样品量<br>n.a. |
| 1                                                                                   |           | 26.537                                                                               | 116.577         | 107.772         | 26.43         | 30.77         | n.a.        |
| 2                                                                                   |           | 36.235                                                                               | 324.431         | 242.514         | 73.57         | 69.23         | n.a.        |
| <b>总和:</b>                                                                          |           |                                                                                      | <b>441.008</b>  | <b>350.285</b>  | <b>100.00</b> | <b>100.00</b> |             |
|  |           |  |                 |                 |               |               |             |
| 40.3% (%ee <sub>1</sub> )                                                           |           | 51.8% (%ee <sub>2</sub> )                                                            |                 |                 |               |               |             |
| Signal                                                                              | Retention | Area                                                                                 | Height          | Area%           | Height%       |               |             |
| <b>积分结果</b>                                                                         |           |                                                                                      |                 |                 |               |               |             |
| 序号                                                                                  | 峰名称       | 保留时间<br>min                                                                          | 峰面积<br>mAU*min  | 峰高<br>mAU       | 相对峰面积<br>%    | 相对峰高<br>%     | 样品量<br>n.a. |
| 1                                                                                   |           | 40.345                                                                               | 624.678         | 211.733         | 29.81         | 33.37         | n.a.        |
| 2                                                                                   |           | 56.530                                                                               | 1470.814        | 422.791         | 70.19         | 66.63         | n.a.        |
| <b>总和:</b>                                                                          |           |                                                                                      | <b>2095.493</b> | <b>634.524</b>  | <b>100.00</b> | <b>100.00</b> |             |
| <b>积分结果</b>                                                                         |           |                                                                                      |                 |                 |               |               |             |
| 序号                                                                                  | 峰名称       | 保留时间<br>min                                                                          | 峰面积<br>mAU*min  | 峰高<br>mAU       | 相对峰面积<br>%    | 相对峰高<br>%     | 样品量<br>n.a. |
| 1                                                                                   |           | 39.765                                                                               | 1242.053        | 355.084         | 24.10         | 28.95         | n.a.        |
| 2                                                                                   |           | 55.033                                                                               | 3911.881        | 871.264         | 75.90         | 71.05         | n.a.        |
| <b>总和:</b>                                                                          |           |                                                                                      | <b>5153.933</b> | <b>1226.348</b> | <b>100.00</b> | <b>100.00</b> |             |

Table S22 continued

|                                                                                     |           |                                                                                      |                |                |               |               |             |
|-------------------------------------------------------------------------------------|-----------|--------------------------------------------------------------------------------------|----------------|----------------|---------------|---------------|-------------|
| 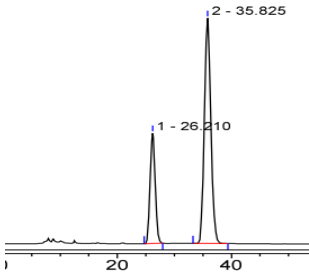   |           |    |                |                |               |               |             |
| 44.22% (%ee1)                                                                       |           | 56.48% (%ee2)                                                                        |                |                |               |               |             |
| Signal                                                                              | Retention | Area                                                                                 | Height         | Area%          | Height%       |               |             |
| <b>积分结果</b>                                                                         |           |                                                                                      |                |                |               |               |             |
| 序号                                                                                  | 峰名称       | 保留时间<br>min                                                                          | 峰面积<br>mAU*min | 峰高<br>mAU      | 相对峰面积<br>%    | 相对峰高<br>%     | 样品量<br>n.a. |
| 1                                                                                   |           | 26.210                                                                               | 191.229        | 183.777        | 27.89         | 32.90         | n.a.        |
| 2                                                                                   |           | 35.825                                                                               | 494.458        | 374.839        | 72.11         | 67.10         | n.a.        |
| <b>总和:</b>                                                                          |           |                                                                                      | <b>685.686</b> | <b>558.616</b> | <b>100.00</b> | <b>100.00</b> |             |
| <b>积分结果</b>                                                                         |           |                                                                                      |                |                |               |               |             |
| 序号                                                                                  | 峰名称       | 保留时间<br>min                                                                          | 峰面积<br>mAU*min | 峰高<br>mAU      | 相对峰面积<br>%    | 相对峰高<br>%     | 样品量<br>n.a. |
| 1                                                                                   |           | 28.327                                                                               | 135.793        | 105.676        | 21.76         | 25.59         | n.a.        |
| 2                                                                                   |           | 38.303                                                                               | 488.379        | 307.220        | 78.24         | 74.41         | n.a.        |
| <b>总和:</b>                                                                          |           |                                                                                      | <b>624.173</b> | <b>412.896</b> | <b>100.00</b> | <b>100.00</b> |             |
|  |           |  |                |                |               |               |             |
| 51.2% (%ee1)                                                                        |           | 60.8% (%ee2)                                                                         |                |                |               |               |             |
| Signal                                                                              | Retention | Area                                                                                 | Height         | Area%          | Height%       |               |             |
| <b>积分结果</b>                                                                         |           |                                                                                      |                |                |               |               |             |
| 序号                                                                                  | 峰名称       | 保留时间<br>min                                                                          | 峰面积<br>mAU*min | 峰高<br>mAU      | 相对峰面积<br>%    | 相对峰高<br>%     | 样品量<br>n.a. |
| 1                                                                                   |           | 42.730                                                                               | 231.639        | 117.969        | 24.32         | 24.91         | n.a.        |
| 2                                                                                   |           | 54.417                                                                               | 720.708        | 355.587        | 75.68         | 75.09         | n.a.        |
| <b>总和:</b>                                                                          |           |                                                                                      | <b>952.347</b> | <b>473.556</b> | <b>100.00</b> | <b>100.00</b> |             |
| <b>积分结果</b>                                                                         |           |                                                                                      |                |                |               |               |             |
| 序号                                                                                  | 峰名称       | 保留时间<br>min                                                                          | 峰面积<br>mAU*min | 峰高<br>mAU      | 相对峰面积<br>%    | 相对峰高<br>%     | 样品量<br>n.a. |
| 1                                                                                   |           | 39.738                                                                               | 160.155        | 91.636         | 19.60         | 20.01         | n.a.        |
| 2                                                                                   |           | 51.050                                                                               | 657.028        | 366.306        | 80.40         | 79.99         | n.a.        |
| <b>总和:</b>                                                                          |           |                                                                                      | <b>817.183</b> | <b>457.942</b> | <b>100.00</b> | <b>100.00</b> |             |

Table S22 continued

|                                                                                     |           |                                                                                      |                 |                |               |               |             |
|-------------------------------------------------------------------------------------|-----------|--------------------------------------------------------------------------------------|-----------------|----------------|---------------|---------------|-------------|
| 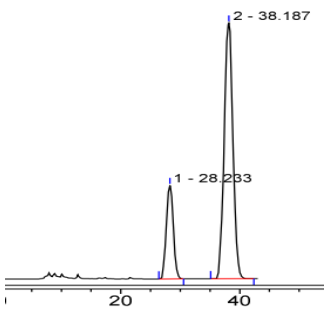   |           |    |                 |                |               |               |             |
| 54.92% (%ee <sub>1</sub> )                                                          |           | 66.54% (%ee <sub>2</sub> )                                                           |                 |                |               |               |             |
| Signal                                                                              | Retention | Area                                                                                 | Height          | Area%          | Height%       |               |             |
| <b>积分结果</b>                                                                         |           |                                                                                      |                 |                |               |               |             |
| 序号                                                                                  | 峰名称       | 保留时间<br>min                                                                          | 峰面积<br>mAU*min  | 峰高<br>mAU      | 相对峰面积<br>%    | 相对峰高<br>%     | 样品量<br>n.a. |
| 1                                                                                   |           | 28.233                                                                               | 207.775         | 152.001        | 22.54         | 26.72         | n.a.        |
| 2                                                                                   |           | 38.187                                                                               | 714.191         | 416.881        | 77.46         | 73.28         | n.a.        |
| <b>总和:</b>                                                                          |           |                                                                                      | <b>921.965</b>  | <b>568.882</b> | <b>100.00</b> | <b>100.00</b> |             |
| <b>积分结果</b>                                                                         |           |                                                                                      |                 |                |               |               |             |
| 序号                                                                                  | 峰名称       | 保留时间<br>min                                                                          | 峰面积<br>mAU*min  | 峰高<br>mAU      | 相对峰面积<br>%    | 相对峰高<br>%     | 样品量<br>n.a. |
| 1                                                                                   |           | 28.558                                                                               | 76.400          | 60.124         | 16.73         | 20.01         | n.a.        |
| 2                                                                                   |           | 38.473                                                                               | 380.236         | 240.316        | 83.27         | 79.99         | n.a.        |
| <b>总和:</b>                                                                          |           |                                                                                      | <b>456.636</b>  | <b>300.440</b> | <b>100.00</b> | <b>100.00</b> |             |
|  |           |  |                 |                |               |               |             |
| 62.3% (%ee <sub>1</sub> )                                                           |           | 70.2% (%ee <sub>2</sub> )                                                            |                 |                |               |               |             |
| Signal                                                                              | Retention | Area                                                                                 | Height          | Area%          | Height%       |               |             |
| <b>积分结果</b>                                                                         |           |                                                                                      |                 |                |               |               |             |
| 序号                                                                                  | 峰名称       | 保留时间<br>min                                                                          | 峰面积<br>mAU*min  | 峰高<br>mAU      | 相对峰面积<br>%    | 相对峰高<br>%     | 样品量<br>n.a. |
| 1                                                                                   |           | 39.750                                                                               | 165.897         | 94.491         | 18.85         | 19.65         | n.a.        |
| 2                                                                                   |           | 51.043                                                                               | 713.963         | 386.455        | 81.15         | 80.35         | n.a.        |
| <b>总和:</b>                                                                          |           |                                                                                      | <b>879.860</b>  | <b>480.946</b> | <b>100.00</b> | <b>100.00</b> |             |
| <b>积分结果</b>                                                                         |           |                                                                                      |                 |                |               |               |             |
| 序号                                                                                  | 峰名称       | 保留时间<br>min                                                                          | 峰面积<br>mAU*min  | 峰高<br>mAU      | 相对峰面积<br>%    | 相对峰高<br>%     | 样品量<br>n.a. |
| 1                                                                                   |           | 39.963                                                                               | 155.072         | 88.953         | 15.07         | 16.12         | n.a.        |
| 2                                                                                   |           | 51.072                                                                               | 874.067         | 462.817        | 84.93         | 83.88         | n.a.        |
| <b>总和:</b>                                                                          |           |                                                                                      | <b>1029.139</b> | <b>551.769</b> | <b>100.00</b> | <b>100.00</b> |             |

Table S22 continued

|                                                                                     |           |                                                                                      |                 |                |               |               |             |
|-------------------------------------------------------------------------------------|-----------|--------------------------------------------------------------------------------------|-----------------|----------------|---------------|---------------|-------------|
| 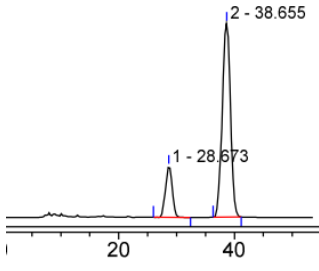   |           |    |                 |                |               |               |             |
| 64.42% (%ee1)                                                                       |           | 73.3% (%ee2)                                                                         |                 |                |               |               |             |
| Signal                                                                              | Retention | Area                                                                                 | Height          | Area%          | Height%       |               |             |
| <b>积分结果</b>                                                                         |           |                                                                                      |                 |                |               |               |             |
| 序号                                                                                  | 峰名称       | 保留时间<br>min                                                                          | 峰面积<br>mAU*min  | 峰高<br>mAU      | 相对峰面积<br>%    | 相对峰高<br>%     | 样品量<br>n.a. |
| 1                                                                                   |           | 28.673                                                                               | 76.697          | 56.020         | 17.79         | 20.79         | n.a.        |
| 2                                                                                   |           | 38.655                                                                               | 354.468         | 213.375        | 82.21         | 79.21         | n.a.        |
| <b>总和:</b>                                                                          |           |                                                                                      | <b>431.166</b>  | <b>269.395</b> | <b>100.00</b> | <b>100.00</b> |             |
| <b>积分结果</b>                                                                         |           |                                                                                      |                 |                |               |               |             |
| 序号                                                                                  | 峰名称       | 保留时间<br>min                                                                          | 峰面积<br>mAU*min  | 峰高<br>mAU      | 相对峰面积<br>%    | 相对峰高<br>%     | 样品量<br>n.a. |
| 1                                                                                   |           | 28.750                                                                               | 140.511         | 95.574         | 13.33         | 16.06         | n.a.        |
| 2                                                                                   |           | 38.450                                                                               | 913.419         | 499.400        | 86.67         | 83.94         | n.a.        |
| <b>总和:</b>                                                                          |           |                                                                                      | <b>1053.929</b> | <b>594.974</b> | <b>100.00</b> | <b>100.00</b> |             |
|  |           |  |                 |                |               |               |             |
| 70.56% (%ee1)                                                                       |           | 76.1% (%ee2)                                                                         |                 |                |               |               |             |
| Signal                                                                              | Retention | Area                                                                                 | Height          | Area%          | Height%       |               |             |
| <b>积分结果</b>                                                                         |           |                                                                                      |                 |                |               |               |             |
| 序号                                                                                  | 峰名称       | 保留时间<br>min                                                                          | 峰面积<br>mAU*min  | 峰高<br>mAU      | 相对峰面积<br>%    | 相对峰高<br>%     | 样品量<br>n.a. |
| 1                                                                                   |           | 40.873                                                                               | 177.858         | 65.374         | 14.72         | 18.67         | n.a.        |
| 2                                                                                   |           | 56.405                                                                               | 1030.735        | 284.835        | 85.28         | 81.33         | n.a.        |
| <b>总和:</b>                                                                          |           |                                                                                      | <b>1208.593</b> | <b>350.209</b> | <b>100.00</b> | <b>100.00</b> |             |
| <b>积分结果</b>                                                                         |           |                                                                                      |                 |                |               |               |             |
| 序号                                                                                  | 峰名称       | 保留时间<br>min                                                                          | 峰面积<br>mAU*min  | 峰高<br>mAU      | 相对峰面积<br>%    | 相对峰高<br>%     | 样品量<br>n.a. |
| 1                                                                                   |           | 41.123                                                                               | 121.370         | 46.048         | 11.95         | 14.93         | n.a.        |
| 2                                                                                   |           | 56.675                                                                               | 894.134         | 262.403        | 88.05         | 85.07         | n.a.        |
| <b>总和:</b>                                                                          |           |                                                                                      | <b>1015.504</b> | <b>308.452</b> | <b>100.00</b> | <b>100.00</b> |             |

Table S22 continued

|                                                                                     |           |                                                                                      |                 |                |               |               |             |
|-------------------------------------------------------------------------------------|-----------|--------------------------------------------------------------------------------------|-----------------|----------------|---------------|---------------|-------------|
|    |           |    |                 |                |               |               |             |
| 82.8% (%ee <sub>1</sub> )                                                           |           | 86.62% (%ee <sub>2</sub> )                                                           |                 |                |               |               |             |
| Signal                                                                              | Retention | Area                                                                                 | Height          | Area%          | Height%       |               |             |
| <b>积分结果</b>                                                                         |           |                                                                                      |                 |                |               |               |             |
| 序号                                                                                  | 峰名称       | 保留时间<br>min                                                                          | 峰面积<br>mAU*min  | 峰高<br>mAU      | 相对峰面积<br>%    | 相对峰高<br>%     | 样品量<br>n.a. |
| 1                                                                                   |           | 28.850                                                                               | 102.349         | 65.139         | 8.60          | 10.43         | n.a.        |
| 2                                                                                   |           | 38.628                                                                               | 1087.488        | 559.502        | 91.40         | 89.57         | n.a.        |
| <b>总和:</b>                                                                          |           |                                                                                      | <b>1189.837</b> | <b>624.641</b> | <b>100.00</b> | <b>100.00</b> |             |
| <b>积分结果</b>                                                                         |           |                                                                                      |                 |                |               |               |             |
| 序号                                                                                  | 峰名称       | 保留时间<br>min                                                                          | 峰面积<br>mAU*min  | 峰高<br>mAU      | 相对峰面积<br>%    | 相对峰高<br>%     | 样品量<br>n.a. |
| 1                                                                                   |           | 29.090                                                                               | 50.897          | 31.465         | 6.69          | 8.33          | n.a.        |
| 2                                                                                   |           | 38.785                                                                               | 710.409         | 346.327        | 93.31         | 91.67         | n.a.        |
| <b>总和:</b>                                                                          |           |                                                                                      | <b>761.306</b>  | <b>377.792</b> | <b>100.00</b> | <b>100.00</b> |             |
|  |           |  |                 |                |               |               |             |
| 89.6% (%ee <sub>1</sub> )                                                           |           | 91.92% (%ee <sub>2</sub> )                                                           |                 |                |               |               |             |
| Signal                                                                              | Retention | Area                                                                                 | Height          | Area%          | Height%       |               |             |
| <b>积分结果</b>                                                                         |           |                                                                                      |                 |                |               |               |             |
| 序号                                                                                  | 峰名称       | 保留时间<br>min                                                                          | 峰面积<br>mAU*min  | 峰高<br>mAU      | 相对峰面积<br>%    | 相对峰高<br>%     | 样品量<br>n.a. |
| 1                                                                                   |           | 40.758                                                                               | 63.483          | 25.114         | 5.20          | 6.97          | n.a.        |
| 2                                                                                   |           | 56.418                                                                               | 1157.243        | 335.298        | 94.80         | 93.03         | n.a.        |
| <b>总和:</b>                                                                          |           |                                                                                      | <b>1220.726</b> | <b>360.412</b> | <b>100.00</b> | <b>100.00</b> |             |
| <b>积分结果</b>                                                                         |           |                                                                                      |                 |                |               |               |             |
| 序号                                                                                  | 峰名称       | 保留时间<br>min                                                                          | 峰面积<br>mAU*min  | 峰高<br>mAU      | 相对峰面积<br>%    | 相对峰高<br>%     | 样品量<br>n.a. |
| 1                                                                                   |           | 29.213                                                                               | 67.104          | 42.394         | 4.04          | 5.26          | n.a.        |
| 2                                                                                   |           | 38.723                                                                               | 1594.298        | 763.380        | 95.96         | 94.74         | n.a.        |
| <b>总和:</b>                                                                          |           |                                                                                      | <b>1661.402</b> | <b>805.774</b> | <b>100.00</b> | <b>100.00</b> |             |

Table S22 continued

|                                                                                     |           |                                                                                      |                |                 |               |               |             |
|-------------------------------------------------------------------------------------|-----------|--------------------------------------------------------------------------------------|----------------|-----------------|---------------|---------------|-------------|
| 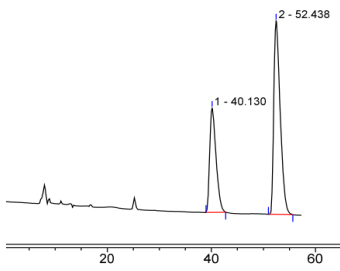   |           |    |                |                 |               |               |             |
| 30.68% (%ee <sub>1</sub> )                                                          |           | 35.62% (%ee <sub>2</sub> )                                                           |                |                 |               |               |             |
| Signal                                                                              | Retention | Area                                                                                 | Height         | Area%           | Height%       |               |             |
| <b>积分结果</b>                                                                         |           |                                                                                      |                |                 |               |               |             |
| 序号                                                                                  | 峰名称       | 保留时间<br>min                                                                          | 峰面积<br>mAU*min | 峰高<br>mAU       | 相对峰面积<br>%    | 相对峰高<br>%     | 样品量<br>n.a. |
| 1                                                                                   |           | 40.130                                                                               | 137.043        | 97.114          | 34.66         | 34.96         | n.a.        |
| 2                                                                                   |           | 52.438                                                                               | 258.347        | 180.644         | 65.34         | 65.04         | n.a.        |
| <b>总和:</b>                                                                          |           |                                                                                      | <b>395.390</b> | <b>277.758</b>  | <b>100.00</b> | <b>100.00</b> |             |
| <b>积分结果</b>                                                                         |           |                                                                                      |                |                 |               |               |             |
| 序号                                                                                  | 峰名称       | 保留时间<br>min                                                                          | 峰面积<br>mAU*min | 峰高<br>mAU       | 相对峰面积<br>%    | 相对峰高<br>%     | 样品量<br>n.a. |
| 1                                                                                   |           | 9.447                                                                                | 98.745         | 543.999         | 32.19         | 34.60         | n.a.        |
| 2                                                                                   |           | 11.085                                                                               | 208.017        | 1028.264        | 67.81         | 65.40         | n.a.        |
| <b>总和:</b>                                                                          |           |                                                                                      | <b>306.762</b> | <b>1572.263</b> | <b>100.00</b> | <b>100.00</b> |             |
|  |           |  |                |                 |               |               |             |
| 30.68% (%ee <sub>1</sub> )                                                          |           | 38.12% (%ee <sub>2</sub> )                                                           |                |                 |               |               |             |
| Signal                                                                              | Retention | Area                                                                                 | Height         | Area%           | Height%       |               |             |
| <b>积分结果</b>                                                                         |           |                                                                                      |                |                 |               |               |             |
| 序号                                                                                  | 峰名称       | 保留时间<br>min                                                                          | 峰面积<br>mAU*min | 峰高<br>mAU       | 相对峰面积<br>%    | 相对峰高<br>%     | 样品量<br>n.a. |
| 1                                                                                   |           | 40.130                                                                               | 137.043        | 97.114          | 34.66         | 34.96         | n.a.        |
| 2                                                                                   |           | 52.438                                                                               | 258.347        | 180.644         | 65.34         | 65.04         | n.a.        |
| <b>总和:</b>                                                                          |           |                                                                                      | <b>395.390</b> | <b>277.758</b>  | <b>100.00</b> | <b>100.00</b> |             |
| <b>积分结果</b>                                                                         |           |                                                                                      |                |                 |               |               |             |
| 序号                                                                                  | 峰名称       | 保留时间<br>min                                                                          | 峰面积<br>mAU*min | 峰高<br>mAU       | 相对峰面积<br>%    | 相对峰高<br>%     | 样品量<br>n.a. |
| 1                                                                                   |           | 38.735                                                                               | 124.057        | 89.835          | 30.94         | 31.94         | n.a.        |
| 2                                                                                   |           | 50.747                                                                               | 276.850        | 191.433         | 69.06         | 68.06         | n.a.        |
| <b>总和:</b>                                                                          |           |                                                                                      | <b>400.907</b> | <b>281.268</b>  | <b>100.00</b> | <b>100.00</b> |             |

Table S22 continued

| 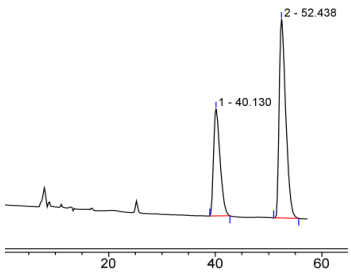   |           |    |                 |                |               |               |             |
|-------------------------------------------------------------------------------------|-----------|--------------------------------------------------------------------------------------|-----------------|----------------|---------------|---------------|-------------|
| 30.68% (%ee <sub>1</sub> )                                                          |           | 41.86% (%ee <sub>2</sub> )                                                           |                 |                |               |               |             |
| Signal                                                                              | Retention | Area                                                                                 | Height          | Area%          | Height%       |               |             |
| <b>积分结果</b>                                                                         |           |                                                                                      |                 |                |               |               |             |
| 序号                                                                                  | 峰名称       | 保留时间<br>min                                                                          | 峰面积<br>mAU*min  | 峰高<br>mAU      | 相对峰面积<br>%    | 相对峰高<br>%     | 样品量<br>n.a. |
| 1                                                                                   |           | 40.130                                                                               | 137.043         | 97.114         | 34.66         | 34.96         | n.a.        |
| 2                                                                                   |           | 52.438                                                                               | 258.347         | 180.644        | 65.34         | 65.04         | n.a.        |
| <b>总和:</b>                                                                          |           |                                                                                      | <b>395.390</b>  | <b>277.758</b> | <b>100.00</b> | <b>100.00</b> |             |
| <b>积分结果</b>                                                                         |           |                                                                                      |                 |                |               |               |             |
| 序号                                                                                  | 峰名称       | 保留时间<br>min                                                                          | 峰面积<br>mAU*min  | 峰高<br>mAU      | 相对峰面积<br>%    | 相对峰高<br>%     | 样品量<br>n.a. |
| 1                                                                                   |           | 42.095                                                                               | 463.147         | 210.820        | 29.37         | 27.50         | n.a.        |
| 2                                                                                   |           | 54.595                                                                               | 1113.572        | 555.678        | 70.63         | 72.50         | n.a.        |
| <b>总和:</b>                                                                          |           |                                                                                      | <b>1576.719</b> | <b>766.498</b> | <b>100.00</b> | <b>100.00</b> |             |
|  |           |  |                 |                |               |               |             |
| 30.68% (%ee <sub>1</sub> )                                                          |           | 42.22% (%ee <sub>2</sub> )                                                           |                 |                |               |               |             |
| Signal                                                                              | Retention | Area                                                                                 | Height          | Area%          | Height%       |               |             |
| <b>积分结果</b>                                                                         |           |                                                                                      |                 |                |               |               |             |
| 序号                                                                                  | 峰名称       | 保留时间<br>min                                                                          | 峰面积<br>mAU*min  | 峰高<br>mAU      | 相对峰面积<br>%    | 相对峰高<br>%     | 样品量<br>n.a. |
| 1                                                                                   |           | 40.130                                                                               | 137.043         | 97.114         | 34.66         | 34.96         | n.a.        |
| 2                                                                                   |           | 52.438                                                                               | 258.347         | 180.644        | 65.34         | 65.04         | n.a.        |
| <b>总和:</b>                                                                          |           |                                                                                      | <b>395.390</b>  | <b>277.758</b> | <b>100.00</b> | <b>100.00</b> |             |
| <b>积分结果</b>                                                                         |           |                                                                                      |                 |                |               |               |             |
| 序号                                                                                  | 峰名称       | 保留时间<br>min                                                                          | 峰面积<br>mAU*min  | 峰高<br>mAU      | 相对峰面积<br>%    | 相对峰高<br>%     | 样品量<br>n.a. |
| 1                                                                                   |           | 43.523                                                                               | 444.496         | 138.693        | 28.89         | 31.42         | n.a.        |
| 2                                                                                   |           | 59.007                                                                               | 1094.313        | 302.786        | 71.11         | 68.58         | n.a.        |
| <b>总和:</b>                                                                          |           |                                                                                      | <b>1538.808</b> | <b>441.479</b> | <b>100.00</b> | <b>100.00</b> |             |

Table S22 continued

|                                                                                     |           |                                                                                      |                 |                |               |               |      |
|-------------------------------------------------------------------------------------|-----------|--------------------------------------------------------------------------------------|-----------------|----------------|---------------|---------------|------|
| 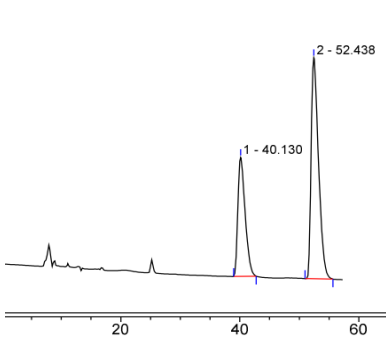   |           |    |                 |                |               |               |      |
| 30.68% (%ee1)                                                                       |           | 42.06% (%ee2)                                                                        |                 |                |               |               |      |
| Signal                                                                              | Retention | Sample                                                                               | Height          | Area%          | Height%       |               |      |
| <b>积分结果</b>                                                                         |           |                                                                                      |                 |                |               |               |      |
| 序号                                                                                  | 峰名称       | 保留时间<br>min                                                                          | 峰面积<br>mAU*min  | 峰高<br>mAU      | 相对峰面积<br>%    | 相对峰高<br>%     | 样品量  |
| 1                                                                                   |           | 40.130                                                                               | 137.043         | 97.114         | 34.66         | 34.96         | n.a. |
| 2                                                                                   |           | 52.438                                                                               | 258.347         | 180.644        | 65.34         | 65.04         | n.a. |
| <b>总和:</b>                                                                          |           |                                                                                      | <b>395.390</b>  | <b>277.758</b> | <b>100.00</b> | <b>100.00</b> |      |
| <b>积分结果</b>                                                                         |           |                                                                                      |                 |                |               |               |      |
| 序号                                                                                  | 峰名称       | 保留时间<br>min                                                                          | 峰面积<br>mAU*min  | 峰高<br>mAU      | 相对峰面积<br>%    | 相对峰高<br>%     | 样品量  |
| 1                                                                                   |           | 42.732                                                                               | 493.065         | 148.493        | 28.97         | 31.60         | n.a. |
| 2                                                                                   |           | 58.272                                                                               | 1208.632        | 321.363        | 71.03         | 68.40         | n.a. |
| <b>总和:</b>                                                                          |           |                                                                                      | <b>1701.698</b> | <b>469.857</b> | <b>100.00</b> | <b>100.00</b> |      |
|  |           |  |                 |                |               |               |      |
| 30.68% (%ee1)                                                                       |           | 42.5% (%ee2)                                                                         |                 |                |               |               |      |
| Signal                                                                              | Retention | Area                                                                                 | Height          | Area%          | Height%       |               |      |
| <b>积分结果</b>                                                                         |           |                                                                                      |                 |                |               |               |      |
| 序号                                                                                  | 峰名称       | 保留时间<br>min                                                                          | 峰面积<br>mAU*min  | 峰高<br>mAU      | 相对峰面积<br>%    | 相对峰高<br>%     | 样品量  |
| 1                                                                                   |           | 40.130                                                                               | 137.043         | 97.114         | 34.66         | 34.96         | n.a. |
| 2                                                                                   |           | 52.438                                                                               | 258.347         | 180.644        | 65.34         | 65.04         | n.a. |
| <b>总和:</b>                                                                          |           |                                                                                      | <b>395.390</b>  | <b>277.758</b> | <b>100.00</b> | <b>100.00</b> |      |
| <b>积分结果</b>                                                                         |           |                                                                                      |                 |                |               |               |      |
| 序号                                                                                  | 峰名称       | 保留时间<br>min                                                                          | 峰面积<br>mAU*min  | 峰高<br>mAU      | 相对峰面积<br>%    | 相对峰高<br>%     | 样品量  |
| 1                                                                                   |           | 42.685                                                                               | 316.308         | 101.181        | 28.75         | 31.88         | n.a. |
| 2                                                                                   |           | 58.640                                                                               | 783.878         | 216.213        | 71.25         | 68.12         | n.a. |
| <b>总和:</b>                                                                          |           |                                                                                      | <b>1100.186</b> | <b>317.394</b> | <b>100.00</b> | <b>100.00</b> |      |

Table S22 continued

|                                                                                   |           |                                                                                    |                 |                |               |               |             |
|-----------------------------------------------------------------------------------|-----------|------------------------------------------------------------------------------------|-----------------|----------------|---------------|---------------|-------------|
| 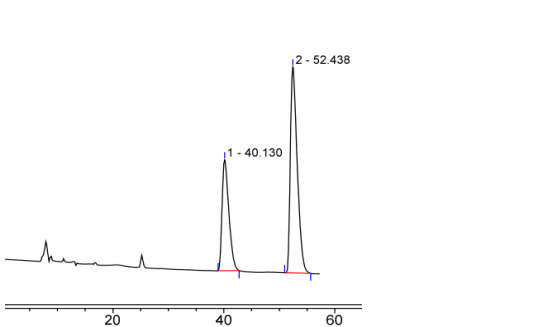 |           |  |                 |                |               |               |             |
| 30.68% (%ee <sub>1</sub> )                                                        |           | 42.64% (%ee <sub>2</sub> )                                                         |                 |                |               |               |             |
| Signal                                                                            | Retention | Area                                                                               | Height          | Area%          | Height%       |               |             |
| <b>积分结果</b>                                                                       |           |                                                                                    |                 |                |               |               |             |
| 序号                                                                                | 峰名称       | 保留时间<br>min                                                                        | 峰面积<br>mAU*min  | 峰高<br>mAU      | 相对峰面积<br>%    | 相对峰高<br>%     | 样品量<br>n.a. |
| 1                                                                                 |           | 40.130                                                                             | 137.043         | 97.114         | 34.66         | 34.96         | n.a.        |
| 2                                                                                 |           | 52.438                                                                             | 258.347         | 180.644        | 65.34         | 65.04         | n.a.        |
| <b>总和:</b>                                                                        |           |                                                                                    | <b>395.390</b>  | <b>277.758</b> | <b>100.00</b> | <b>100.00</b> |             |
| <b>积分结果</b>                                                                       |           |                                                                                    |                 |                |               |               |             |
| 序号                                                                                | 峰名称       | 保留时间<br>min                                                                        | 峰面积<br>mAU*min  | 峰高<br>mAU      | 相对峰面积<br>%    | 相对峰高<br>%     | 样品量<br>n.a. |
| 1                                                                                 |           | 42.213                                                                             | 655.890         | 195.229        | 28.68         | 31.81         | n.a.        |
| 2                                                                                 |           | 57.942                                                                             | 1630.929        | 418.424        | 71.32         | 68.19         | n.a.        |
| <b>总和:</b>                                                                        |           |                                                                                    | <b>2286.819</b> | <b>613.653</b> | <b>100.00</b> | <b>100.00</b> |             |

<sup>a</sup> It was found that the benzamide could be well isolated by chiral column. The L-TME with %ee<sub>1</sub> was converted into the corresponding amide as illustrated below. Theoretically, the %ee value of the benzamide will be the same as that of the L-TME (%ee<sub>2</sub>).

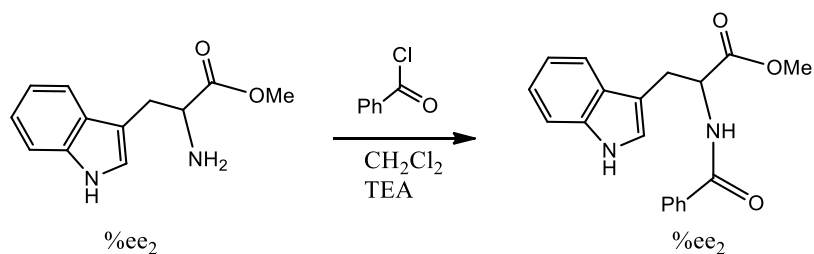

The amide structure was identified by NMR spectra.

**Item 14. The %ee<sub>2</sub> values of TME via HPLC (Table S23)**

Table 23A The %ee<sub>2</sub> changes when starting material %ee<sub>1</sub> changes from 6.1% to 89.6% summarized from Table S22.

| %ee <sub>1</sub> | %ee <sub>2</sub> | Δ%ee |
|------------------|------------------|------|
| 6.1              | 11.7             | 5.6  |
| 9.3              | 15.8             | 6.5  |
| 21.9             | 30.8             | 8.9  |
| 30.6             | 38.9             | 8.3  |
| 35.7             | 47.1             | 11.4 |
| 40.3             | 51.8             | 10.5 |
| 44.2             | 56.5             | 12.3 |
| 51.2             | 60.8             | 9.6  |
| 54.92            | 66.54            | 11.6 |
| 62.3             | 70.2             | 7.9  |
| 64.4             | 73.3             | 8.9  |
| 70.5             | 76.1             | 5.6  |
| 82.8             | 86.6             | 3.8  |
| 89.6             | 91.9             | 2.3  |

Table 23B The %ee<sub>2</sub> change tendency when the starting material's %ee<sub>1</sub> was fixed and the mole ratio of oxalaldehyde to D-TME increased from 0.7 to 1.3 summarized from Table S22.

|     | %ee <sub>1</sub> | %ee <sub>2</sub> | Δ%ee |
|-----|------------------|------------------|------|
| 0.7 | 30.6             | 35.7             | 5.1  |
| 0.8 | 30.6             | 38.2             | 7.6  |
| 0.9 | 30.6             | 41.9             | 11.3 |
| 1.0 | 30.6             | 42.3             | 11.7 |
| 1.1 | 30.6             | 42.1             | 11.5 |
| 1.2 | 30.6             | 42.5             | 11.9 |
| 1.3 | 30.6             | 42.7             | 12.1 |

### Item 15. HPLC analysis of %ee values of recovered L-phenylalanine (Tables S24-S25)

This was performed by converting it into the corresponding benzamide after the reaction of oxalyl dichloride with L-phenylalanine.

Table S24 Analysis of %ee values of L-phenylalanine benzamide via HPLC <sup>a</sup>.

| HPLC peaks before the reaction <sup>b</sup>                                                                                                                                                                                                                                                                                                                              |           |             |                | HPLC peaks after the reaction <sup>c</sup>                                           |            |           |             |
|--------------------------------------------------------------------------------------------------------------------------------------------------------------------------------------------------------------------------------------------------------------------------------------------------------------------------------------------------------------------------|-----------|-------------|----------------|--------------------------------------------------------------------------------------|------------|-----------|-------------|
| 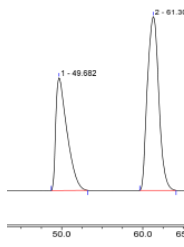                                                                                                                                                                                                                                                                                        |           |             |                |    |            |           |             |
| %ee <sub>1</sub> = 22.04%                                                                                                                                                                                                                                                                                                                                                |           |             |                | %ee <sub>2</sub> = 23.80%                                                            |            |           |             |
| Signal                                                                                                                                                                                                                                                                                                                                                                   | Retention | Sample      | Height         | Area%                                                                                | Height%    |           |             |
| <b>积分结果</b>                                                                                                                                                                                                                                                                                                                                                              |           |             |                |                                                                                      |            |           |             |
| 序号                                                                                                                                                                                                                                                                                                                                                                       | 峰名称       | 保留时间<br>min | 峰面积<br>mAU*min | 峰高<br>mAU                                                                            | 相对峰面积<br>% | 相对峰高<br>% | 样品量<br>n.a. |
| 1                                                                                                                                                                                                                                                                                                                                                                        |           | 49.682      | 537.814        | 335.758                                                                              | 38.98      | 39.35     | n.a.        |
| 2                                                                                                                                                                                                                                                                                                                                                                        |           | 61.302      | 842.072        | 517.481                                                                              | 61.02      | 60.65     | n.a.        |
| 总和:                                                                                                                                                                                                                                                                                                                                                                      |           |             | 1379.885       | 853.238                                                                              | 100.00     | 100.00    |             |
| <b>积分结果</b>                                                                                                                                                                                                                                                                                                                                                              |           |             |                |                                                                                      |            |           |             |
| 序号                                                                                                                                                                                                                                                                                                                                                                       | 峰名称       | 保留时间<br>min | 峰面积<br>mAU*min | 峰高<br>mAU                                                                            | 相对峰面积<br>% | 相对峰高<br>% | 样品量<br>n.a. |
| 1                                                                                                                                                                                                                                                                                                                                                                        |           | 47.617      | 379.514        | 267.309                                                                              | 38.10      | 37.11     | n.a.        |
| 2                                                                                                                                                                                                                                                                                                                                                                        |           | 57.638      | 616.651        | 452.941                                                                              | 61.90      | 62.89     | n.a.        |
| 总和:                                                                                                                                                                                                                                                                                                                                                                      |           |             | 996.165        | 720.250                                                                              | 100.00     | 100.00    |             |
|                                                                                                                                                                                                                                                                                       |           |             |                |  |            |           |             |
| %ee <sub>1</sub> = 26.76%                                                                                                                                                                                                                                                                                                                                                |           |             |                | %ee <sub>2</sub> = 29.06%                                                            |            |           |             |
| Signal                                                                                                                                                                                                                                                                                                                                                                   | Retention | Sample      | Height         | Area%                                                                                | Height%    |           |             |
| <b>积分结果</b>                                                                                                                                                                                                                                                                                                                                                              |           |             |                |                                                                                      |            |           |             |
| 序号                                                                                                                                                                                                                                                                                                                                                                       | 峰名称       | 保留时间<br>min | 峰面积<br>mAU*min | 峰高<br>mAU                                                                            | 相对峰面积<br>% | 相对峰高<br>% | 样品量<br>n.a. |
| 1                                                                                                                                                                                                                                                                                                                                                                        |           | 49.207      | 393.105        | 266.941                                                                              | 36.62      | 36.56     | n.a.        |
| 2                                                                                                                                                                                                                                                                                                                                                                        |           | 59.933      | 680.336        | 463.252                                                                              | 63.38      | 63.44     | n.a.        |
| 总和:                                                                                                                                                                                                                                                                                                                                                                      |           |             | 1073.441       | 730.193                                                                              | 100.00     | 100.00    |             |
| <b>积分结果</b>                                                                                                                                                                                                                                                                                                                                                              |           |             |                |                                                                                      |            |           |             |
| 序号                                                                                                                                                                                                                                                                                                                                                                       | 峰名称       | 保留时间<br>min | 峰面积<br>mAU*min | 峰高<br>mAU                                                                            | 相对峰面积<br>% | 相对峰高<br>% | 样品量<br>n.a. |
| 1                                                                                                                                                                                                                                                                                                                                                                        |           | 45.683      | 390.070        | 290.705                                                                              | 35.47      | 34.92     | n.a.        |
| 2                                                                                                                                                                                                                                                                                                                                                                        |           | 55.060      | 709.674        | 541.677                                                                              | 64.53      | 65.08     | n.a.        |
| 总和:                                                                                                                                                                                                                                                                                                                                                                      |           |             | 1099.744       | 832.382                                                                              | 100.00     | 100.00    |             |
| <sup>a</sup> More details could be found in the end of the Table. <sup>b</sup> “Before the reaction” means the HPLC plot analyzed for %ee <sub>1</sub> of L-TME prepared as the starting material. <sup>c</sup> “After the reaction” means HPLC plot analyzed for the corresponding %ee <sub>2</sub> of the L-TME that was recovered after the Pictet-Spengler reaction. |           |             |                |                                                                                      |            |           |             |

Table 24 continued

|                                                                                     |           |                                                                                      |                 |                 |               |               |             |
|-------------------------------------------------------------------------------------|-----------|--------------------------------------------------------------------------------------|-----------------|-----------------|---------------|---------------|-------------|
| 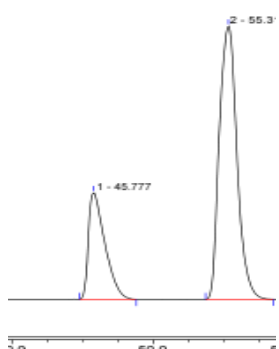   |           |    |                 |                 |               |               |             |
| %ee <sub>1</sub> =46.56%                                                            |           | %ee <sub>2</sub> =50.50%                                                             |                 |                 |               |               |             |
| Signal                                                                              | Retention | Sample                                                                               | Height          | Area%           | Height%       |               |             |
| <b>积分结果</b>                                                                         |           |                                                                                      |                 |                 |               |               |             |
| 序号                                                                                  | 峰名称       | 保留时间<br>min                                                                          | 峰面积<br>mAU*min  | 峰高<br>mAU       | 相对峰面积<br>%    | 相对峰高<br>%     | 样品量<br>n.a. |
| 1                                                                                   |           | 45.777                                                                               | 390.013         | 289.182         | 26.72         | 28.07         | n.a.        |
| 2                                                                                   |           | 55.315                                                                               | 1069.559        | 741.019         | 73.28         | 71.93         | n.a.        |
| 总和:                                                                                 |           |                                                                                      | <b>1459.571</b> | <b>1030.201</b> | <b>100.00</b> | <b>100.00</b> |             |
| <b>积分结果</b>                                                                         |           |                                                                                      |                 |                 |               |               |             |
| 序号                                                                                  | 峰名称       | 保留时间<br>min                                                                          | 峰面积<br>mAU*min  | 峰高<br>mAU       | 相对峰面积<br>%    | 相对峰高<br>%     | 样品量<br>n.a. |
| 1                                                                                   |           | 45.830                                                                               | 385.215         | 285.785         | 24.75         | 26.62         | n.a.        |
| 2                                                                                   |           | 55.482                                                                               | 1171.499        | 787.894         | 75.25         | 73.38         | n.a.        |
| 总和:                                                                                 |           |                                                                                      | <b>1556.714</b> | <b>1073.680</b> | <b>100.00</b> | <b>100.00</b> |             |
|  |           |  |                 |                 |               |               |             |
| %ee <sub>1</sub> =56.02%                                                            |           | %ee <sub>2</sub> =56.82%                                                             |                 |                 |               |               |             |
| Signal                                                                              | Retention | Sample                                                                               | Height          | Area%           | Height%       |               |             |
| <b>积分结果</b>                                                                         |           |                                                                                      |                 |                 |               |               |             |
| 序号                                                                                  | 峰名称       | 保留时间<br>min                                                                          | 峰面积<br>mAU*min  | 峰高<br>mAU       | 相对峰面积<br>%    | 相对峰高<br>%     | 样品量<br>n.a. |
| 1                                                                                   |           | 46.833                                                                               | 229.971         | 185.459         | 21.99         | 24.34         | n.a.        |
| 2                                                                                   |           | 56.438                                                                               | 815.981         | 576.366         | 78.01         | 75.66         | n.a.        |
| 总和:                                                                                 |           |                                                                                      | <b>1045.953</b> | <b>761.824</b>  | <b>100.00</b> | <b>100.00</b> |             |
| <b>积分结果</b>                                                                         |           |                                                                                      |                 |                 |               |               |             |
| 序号                                                                                  | 峰名称       | 保留时间<br>min                                                                          | 峰面积<br>mAU*min  | 峰高<br>mAU       | 相对峰面积<br>%    | 相对峰高<br>%     | 样品量<br>n.a. |
| 1                                                                                   |           | 48.970                                                                               | 314.046         | 214.856         | 21.59         | 24.13         | n.a.        |
| 2                                                                                   |           | 60.075                                                                               | 1140.361        | 675.428         | 78.41         | 75.87         | n.a.        |
| 总和:                                                                                 |           |                                                                                      | <b>1454.407</b> | <b>890.284</b>  | <b>100.00</b> | <b>100.00</b> |             |

Table 24 continued

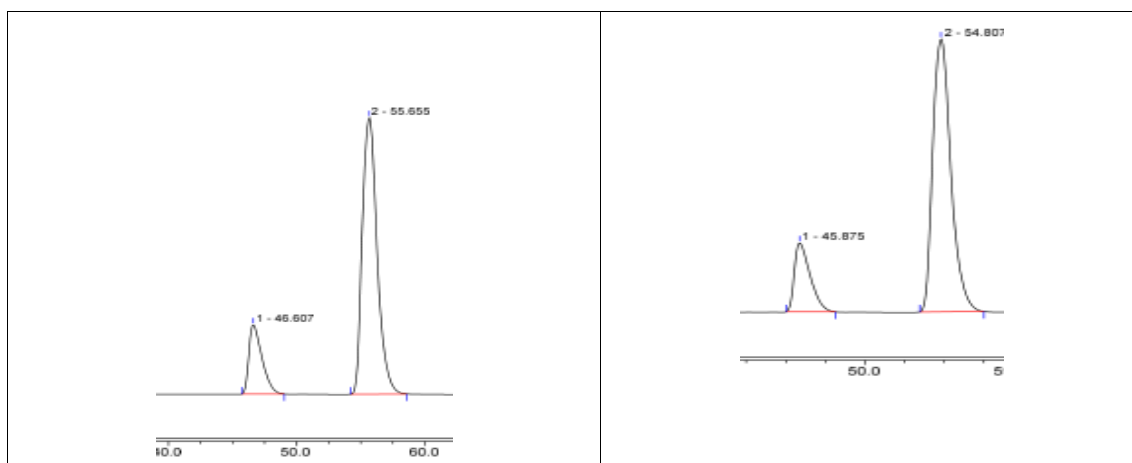

%ee<sub>1</sub>=63.86%

%ee<sub>2</sub>=64.16%

| Signal      | Retention | Sample      | Height          | Area%          | Height%       |               |
|-------------|-----------|-------------|-----------------|----------------|---------------|---------------|
| <b>积分结果</b> |           |             |                 |                |               |               |
| 序号          | 峰名称       | 保留时间<br>min | 峰面积<br>mAU*min  | 峰高<br>mAU      | 相对峰面积<br>%    | 相对峰高<br>%     |
| 1           |           | 46.607      | 187.748         | 158.714        | 18.07         | 20.02         |
| 2           |           | 55.655      | 851.469         | 633.870        | 81.93         | 79.98         |
| 总和:         |           |             | <b>1039.218</b> | <b>792.584</b> | <b>100.00</b> | <b>100.00</b> |
| <b>积分结果</b> |           |             |                 |                |               |               |
| 序号          | 峰名称       | 保留时间<br>min | 峰面积<br>mAU*min  | 峰高<br>mAU      | 相对峰面积<br>%    | 相对峰高<br>%     |
| 1           |           | 45.875      | 178.606         | 154.786        | 17.92         | 20.14         |
| 2           |           | 54.807      | 817.819         | 613.651        | 82.08         | 79.86         |
| 总和:         |           |             | <b>996.425</b>  | <b>768.437</b> | <b>100.00</b> | <b>100.00</b> |

<sup>a</sup> During the conversion of L-TME to the corresponding (S)-methyl 2,3,4,9-tetrahydro-1H-pyrido[3,4-b]indole-3-carboxylate, the students found the reaction required much long time. The other master students tried other methods for the isolation of the recovered L-TME. Finally, it was found that the benzamide could be well isolated by chiral column. The L-TME with %ee<sub>2</sub> was converted into the corresponding amide as illustrated below. Theoretically, the %ee value of the benzamide will be the same as that of the L-TME (%ee<sub>2</sub>).

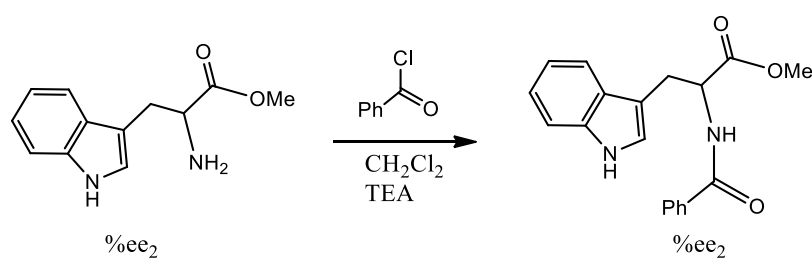

The amide structure was identified by NMR spectra.

Table 25 The %ee<sub>2</sub> changes when starting material %ee<sub>1</sub> varies (summary of Table S24).

| %ee <sub>1</sub> | %ee <sub>2</sub> | Δ%ee |
|------------------|------------------|------|
| 22.0%            | 23.8%            | 1.8% |
| 26.7%            | 29.0%            | 2.3% |
| 46.6%            | 50.5%            | 3.9% |
| 56.0%            | 56.8%            | 0.8% |
| 63.9%            | 64.2%            | 0.3% |

## Item 16 The computed relative energies for the cyclodimers of six selected amino acids.

Table S26 The predicted energy for six selected amino acids using DFT methods in the gas phase and in liquid using PCM model.

| Entry | R (Amino acid)                                                                                     | $E_{L,L\text{-product}}$ (a.u.) <sup>a</sup> | $E_{D,L\text{-product}}$ (a.u.) | $\Delta E$ <sup>b</sup> |
|-------|----------------------------------------------------------------------------------------------------|----------------------------------------------|---------------------------------|-------------------------|
| 1     | -Me (Alanine)                                                                                      | -494.805868 (g)                              | -494.805516 (g)                 | +0.221 (g)              |
|       |                                                                                                    | -494.822208 (l)                              | -494.822517 (l)                 | -0.194 (l)              |
| 2     | -CHMeCH <sub>2</sub> Me<br>(isoleucine)                                                            | -730.751373 (g)                              | -730.751961 (l)                 | -0.369 (g)              |
|       |                                                                                                    | -730.766768 (l)                              | -730.767541 (l)                 | -0.485 (l)              |
| 3     | -CHMe <sub>2</sub><br>(Valine)                                                                     | -652.104422 (g)                              | -652.104962 (g)                 | -0.339 (g)              |
|       |                                                                                                    | -652.119857 (l)                              | -652.120556 (l)                 | -0.438 (l)              |
| 4     | -CH <sub>2</sub> SH<br>(Cysteine)                                                                  | -1291.236420 (g)                             | -1291.236050 (g)                | +0.232 (g)              |
|       |                                                                                                    | -1291.254319 (l)                             | -1291.254291 (l)                | +0.018 (l)              |
| 5     | -CH <sub>2</sub> CO <sub>2</sub> H<br>(Aspartic acid)                                              | H-bond formed:                               |                                 |                         |
|       |                                                                                                    | -872.081036 (g)                              | -872.080993 (g)                 | +0.027 (g)              |
|       |                                                                                                    | -872.103256 (l)                              | -872.103551 (l)                 | -0.185 (l)              |
|       |                                                                                                    | Non-H-bond:                                  |                                 |                         |
|       |                                                                                                    | -872.072699 (g)                              | -872.073684 (g)                 | -0.618 (g)              |
|       |                                                                                                    | -872.100224 (l)                              | -872.101097 (l)                 | -0.547 (l)              |
| 6     | 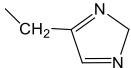<br>(Histidine) | H-bond formed:                               |                                 |                         |
|       |                                                                                                    | -944.987923 (g)                              | -944.986684 (g)                 | 0.777 (g)               |
|       |                                                                                                    | -945.017233 (l)                              | -945.016235 (l)                 | 0.626 (l)               |
|       |                                                                                                    | Non-H-bond:                                  |                                 |                         |
|       |                                                                                                    | -944.976114 (g)                              | -944.979602 (g)                 | -2.189 (g)              |
|       |                                                                                                    | -945.009154 (l)                              | -945.010790 (l)                 | -1.026 (l)              |

<sup>a</sup>The computed total electronic energy was obtained at the B3LYP/6-311++G(2d,p) level in the gas phase (g) and in liquid water (l) using the PCM model, respectively, atom unit (a.u.) was used. <sup>b</sup>The energy difference were computed using the formula:  $\Delta E = 627.5 \times (E_{D,L\text{-product}} - E_{L,L\text{-product}})$ , unit in kcal/mol.
